# Supplementary material for: ketu mutant mice uncover an essential meiotic function for the ancient RNA helicase YTHDC2
Source: eLife. 2018 Jan 23;7:e30919. doi: 10.7554/eLife.30919 (PMC5832417; doi:10.7554/eLife.30919)
Supplement: Figure 1—source data 1. [file elife-30919-fig1-data1.xlsx]

## Sheet: Sheet1
Figure 1−Source Data 1. Number of SYCP3-staining cells plotted in Figure 1D.
Mouse name	Early prophase-like	Late prophase-like	Type I	Type II	Type III	Total counted
a'	280	710				990
b'	273	802				1075
c'	229	732				961
a			462	61	3	526
b			459	138	21	618
c			625	205	4	834
d			395	82	3	480
