# Supplementary material for: ketu mutant mice uncover an essential meiotic function for the ancient RNA helicase YTHDC2
Source: eLife. 2018 Jan 23;7:e30919. doi: 10.7554/eLife.30919 (PMC5832417; doi:10.7554/eLife.30919)
Supplement: Figure 2—source data 1. [file elife-30919-fig2-data1.xlsx]

## Sheet: Sheet1
Figure 2−Source Data 1. Ythdc2 and Meioc RPKM valuesa plotted in Figure 2D.
Tissue	Ythdc2 RPKM1	Ythdc2 RPKM2	Ythdc2 mean RPKM	Meioc RPKM1	Meioc RPKM2	Meioc mean RPKM
E14.5 Whole brain	0.868489	1.01175	0.940119	0.00659	0.002709	0.0046495
Cerebellum	0.780359	0.773734	0.777046	0.001045	0	0.0005225
Frontal lobe	0.717772	0.807176	0.762474	0	0.001632	0.000816
E14.5 Limb	0.752486	0.745957	0.749221	0.080855	0.100654	0.0907545
Cortex	0.762078	0.722246	0.742162	0	0	0
E14.5 Liver	0.605008	0.539231	0.57212	0.010177	0.004323	0.00725
Testis	0.18167	0.20735	0.19451	2.04674	3.17425	2.61049
Heart	0.185392	0.085137	0.135265	0.010463	0	0.0052315
Thymus	0.094756	0.094702	0.094729	0.00085	0.000656	0.000753
Lung	0.109945	0.06842	0.0891825	0	0	0
Large intestine	0.088504	0.074068	0.081286	0.00189	0	0.000945
Mammary Gland	0.099266	0.052886	0.076076	0	0	0
Spleen	0.06086	0.079701	0.0702805	0	0	0
Kidney	0.052163	0.05829	0.0552265	0	0	0
Colon	0.051989	0.057743	0.054866	0	0	0
Ovary	0.052446	0.037225	0.0448355	0	0	0
Liver	0.038567	0.032934	0.0357505	0	0	0
Small Intestine	0.02436	0.015822	0.020091	0	0	0
Stomach	0.016657	0.022355	0.019506	0	0	0
Adrenal Gland	0.015028	0.013494	0.014261	0	0	0
Duodenum	0.009918	0.018319	0.0141185	0	0	0
aENCODE long-RNA sequencing data (release 3).
