# Supplementary material for: ketu mutant mice uncover an essential meiotic function for the ancient RNA helicase YTHDC2
Source: eLife. 2018 Jan 23;7:e30919. doi: 10.7554/eLife.30919 (PMC5832417; doi:10.7554/eLife.30919)
Supplement: Figure 3—figure supplement 1—source data 1. [file elife-30919-fig3-figsupp1-data1.xlsx]

## Sheet: Sheet1
Figure 3−Figure Supplement 1−Source Data 1. Quantification of TUNEL assay plotted in panel A.
Mouse name	Number of tubules with ≥5 TUNEL positive cells	Number of tubules counted	Percent of tubules with ≥5 TUNEL positive cells
8 dppYthdc2+/+ a'	10	850	1.17647
8 dppYthdc2ketu/ketu a	3	735	0.408163
8 dppYthdc2+/ketu b'	8	1037	0.771456
8 dppYthdc2ketu/ketu b	13	1508	0.862069
10 dppYthdc2+/+ a'	7	418	1.67464
10 dppYthdc2ketu/ketu a	25	624	4.00641
10 dppYthdc2+/ketu b'	25	1021	2.44858
10 dppYthdc2ketu/ketu b	9	820	1.09756
14 dppYthdc2+/+ a'	7	528	1.32576
14 dppYthdc2ketu/ketu a	96	690	13.913
15 dppYthdc2+/+ a'	45	756	5.95238
15 dppYthdc2ketu/ketu a	169	869	19.4476
