# Supplementary material for: ketu mutant mice uncover an essential meiotic function for the ancient RNA helicase YTHDC2
Source: eLife. 2018 Jan 23;7:e30919. doi: 10.7554/eLife.30919 (PMC5832417; doi:10.7554/eLife.30919)
Supplement: Figure 6—source data 2. [file elife-30919-fig6-data2.xlsx]

## Sheet: Sheet1
Figure 6−Source Data 2. p-values of significantly enriched GO terms in Clusters II and III plotted in Figure 6D.
Category	Term ID	Term name	Benjamini-Hochberg-adjusted p-value from DAVID	Genes
GOTERM_BP_DIRECT	GO:0051321	meiotic cell cycle	2.64505e-19	TERB1, MSH5, MEIOB, SPO11, SYCP2, SYCP1, RAD21L, CCNB3, PRDM9, SYCP3, STAG3, HORMAD1, SPATA22, SMC1B, HFM1
GOTERM_BP_DIRECT	GO:0007129	synapsis	3.77242e-15	SYCP3, TERB1, MSH5, MEIOB, STAG3, HORMAD1, SPO11, SYCP1, SPATA22, RAD21L
GOTERM_BP_DIRECT	GO:0007130	synaptonemal complex assembly	1.59127e-07	TEX12, SYCP3, HORMAD1, SPO11, SYCP1, RAD21L
GOTERM_BP_DIRECT	GO:0000711	meiotic DNA repair synthesis	4.36815e-06	TEX12, SYCP3, SYCP1, SPATA22
GOTERM_BP_DIRECT	GO:0007283	spermatogenesis	0.00043093	ZFP541, PRDM9, SYCP3, ADAD1, MTL5, HORMAD1, SYCP1, HFM1, RAD21L
GOTERM_BP_DIRECT	GO:0007049	cell cycle	0.00664477	SPDYA, CCNB3, SYCP3, BUB1, STAG3, CUZD1, SYCP2, SYCP1, SMC1B
GOTERM_BP_DIRECT	GO:0051026	chiasma assembly	0.00709811	SYCP3, MSH5, SYCP1
GOTERM_BP_DIRECT	GO:0009566	fertilization	0.00924278	MEIOB, SYCP2, SPATA22, RAD21L
GOTERM_BP_DIRECT	GO:0007141	male meiosis I	0.0327061	DMRTC2, MEIOB, SPO11
GOTERM_BP_DIRECT	GO:0007126	meiotic nuclear division	0.0467995	SYCP3, HORMAD1, SMC1B
