# Supplementary material for: ketu mutant mice uncover an essential meiotic function for the ancient RNA helicase YTHDC2
Source: eLife journal article supplement (doi:10.7554/elife.30919), 2018-01-23
Supplement: supp [file elife-30919-supp-v1.zip]

### Figure 10–Figure Supplement 2

[illegible]
