# Supplementary material for: ketu mutant mice uncover an essential meiotic function for the ancient RNA helicase YTHDC2
Source: eLife journal article supplement (doi:10.7554/elife.30919), 2018-01-23
Supplement: supp [file elife_poa_e30919_Figure_3_source_data_1.xlsx]

## Sheet: Sheet1
Figure 3−Source Data 1. Testes and body weights plotted in Figure 3A.
Category	ketu genotype	em1 genotype	Age (weeks)	Body weight (g)	Testes weight (g)	Testes/body weight (%)	Mean wildtype and single heterozygote	Mean mutant	Percent reduction	p-value (one-sided Student’s t test)
ketu	WT	N/A	33.8571	50.26	0.245	0.487465	0.582875		76.3478	1.30245e-06
	WT	N/A	5.71429	28.04	0.164	0.584879
	WT	N/A	5.71429	27.35	0.178	0.650823
	WT	N/A	5.71429	31	0.202	0.651613
	Het	N/A	5.71429	26.93	0.153	0.56814
	Het	N/A	5.71429	28.12	0.168	0.59744
	Het	N/A	33.8571	45.39	0.245	0.539766
	Mut	N/A	5.71429	34.26	0.05	0.145943		0.137863
	Mut	N/A	5.71429	30.19	0.053	0.175555
	Mut	N/A	33.8571	55.38	0.051	0.092091
em1	N/A	WT	9.85714	25.84	0.156	0.603715	0.568391		66.7703	2.25333e-09
	N/A	WT	9.85714	28.39	0.169	0.59528
	N/A	WT	8.42857	27.94	0.144	0.51539
	N/A	WT	22.1429	32.56	0.187	0.574324
	N/A	Het	8.42857	29.3	0.153	0.522184
	N/A	Het	9.85714	30.15	0.179	0.593698
	N/A	Het	8.42857	29.59	0.165	0.557621
	N/A	Het	8.42857	28.38	0.166	0.584919
	N/A	Mut	22.1429	34.68	0.055	0.158593		0.188875
	N/A	Mut	22.1429	33.08	0.056	0.169287
	N/A	Mut	9.85714	25.01	0.058	0.231907
	N/A	Mut	8.42857	32.19	0.063	0.195713
ketu/em1	WT	Het	9.42857	27.47	0.152	0.553331	0.628733		67.5296	2.84596e-08
	Het	WT	9.42857	26.48	0.172	0.649547
	Het	WT	9.42857	27.83	0.179	0.643191
	Het	WT	6.85714	27.2	0.167	0.613971
	Het	WT	6.85714	30.21	0.193	0.638861
	WT	WT	9.42857	25.8	0.165	0.639535
	WT	WT	6.85714	28.52	0.189	0.662693
	Het	Het	6.85714	29.66	0.063	0.212407		0.204152
	Het	Het	6.85714	25.64	0.054	0.210608
	Het	Het	9.42857	24.81	0.047	0.18944
