# Supplementary material for: ketu mutant mice uncover an essential meiotic function for the ancient RNA helicase YTHDC2
Source: eLife journal article supplement (doi:10.7554/elife.30919), 2018-01-23
Supplement: supp [file elife_poa_e30919_Figure_4_source_data_1.xlsx]

## Sheet: DAPI counts
DAPI of PH3 pos counts	180/181 WT	661/662 WT	180/181 MUT	661/662 MUT
condensed	227	236	988	1159
not condensed	56	45	43	77
total cells from imageJ	52631	62986	40960	41538
	14 dppYthdc2+/+	15 dpp Ythdc2+/+	14 dpp Ythdc2ketu/ketu	15 dpp Ythdc2ketu/ketu
percent PH3 positive & not condensed	0.106401	0.0714444	0.10498	0.185372
percent PH3 positive & condensed	0.431305	0.374686	2.41211	2.79022

## Sheet: Sheet1
Figure 4−Source Data 1. Quantification of pH3 immunofluorescence plotted in Figure 4D.
Mouse name	Number of strongly pH3-positive cells with DAPI staining indicative of condensed chromatin	Number of strongly pH3-positive cells with DAPI staining indicative of not condensed chromatin	Total cells	Percent of strongly pH3-positive cells with DAPI staining indicative of condensed chromatin	Percent of strongly pH3-positive cells with DAPI staining indicative of not condensed chromatin
14 dppYthdc2+/+	227	56	52631	0.431305	0.106401
15 dpp Ythdc2+/+	236	45	62986	0.374686	0.0714444
14 dpp Ythdc2ketu/ketu	988	43	40960	2.41211	0.10498
15 dpp Ythdc2ketu/ketu	1159	77	41538	2.79022	0.185372
p-value (two-sided Student’s t test comparing wild type and mutant)				0.00747799	0.327971
