# Supplementary material for: ketu mutant mice uncover an essential meiotic function for the ancient RNA helicase YTHDC2
Source: eLife journal article supplement (doi:10.7554/elife.30919), 2018-01-23
Supplement: supp [file elife_poa_e30919_Figure_4_source_data_2.xlsx]

## Sheet: TUB counts
		14 dppYthdc2+/+	15 dpp Ythdc2+/+	14 dpp Ythdc2ketu/ketu	15 dpp Ythdc2ketu/ketu
	percent 2 spdl of counted	58.7786	75.8865	27.6451	22.7106
	percent 1 spdl of counted	41.2214	24.1135	72.3549	77.2894
	2 spdl	77	107	81	62
	1 spdl	54	34	212	211
	total counted	131	141	293	273

## Sheet: Sheet1
Figure 4−Source Data 2. Quantification of spindle poles plotted in Figure 4E.
Mouse name	Number of cells with two visible spindle poles	Number of cells with one visible spindle pole	Total cells counted	Percent of cells with two visible spindle poles	Percent of cells with one visible spindle pole
14 dppYthdc2+/+	77	54	131	58.7786	41.2214
15 dpp Ythdc2+/+	107	34	141	75.8865	24.1135
14 dpp Ythdc2ketu/ketu	81	212	293	27.6451	72.3549
15 dpp Ythdc2ketu/ketu	62	211	273	22.7106	77.2894
p-value (two-sided Student’s t test comparing wild type and mutant)				0.041823	0.041823
