# Supplementary material for: ketu mutant mice uncover an essential meiotic function for the ancient RNA helicase YTHDC2
Source: eLife journal article supplement (doi:10.7554/elife.30919), 2018-01-23
Supplement: supp [file elife_poa_e30919_Figure_5_source_data_2.xlsx]

## Sheet: Sheet1
Figure 5−Source Data 2. Quantification of BrdU and SYCP3 immunofluorescence plotted in Figure 5C.
Mouse name	Number of SYCP3 positive cells	Number of BrdU positive cells	Number of SYCP3 and BrdU positive cells	Total cells	Percent of SYCP3 positive cells	Percent of BrdU positive cells	Percent of SYCP3 and BrdU positive cells
15 dppYthdc2+/+ a'	13118	16610	2779	64510	20.3348	25.7479	4.30786
Ythdc2ketu/ketu a	4784	17534	1690	64510	7.41591	27.1803	2.61975
Ythdc2+/ketu b'	16652	9714	935	55428	30.0426	17.5254	1.68687
Ythdc2+/ketub''	18469	7764	1243	55428	33.3207	14.0074	2.24255
Ythdc2ketu/ketu b	5003	10357	681	55428	9.02612	18.6855	1.22862
p-value (two-sided Student’s t test comparing wild type/heterozygous and mutant)					0.0302816	0.535017	0.527396
