# Supplementary material for: ketu mutant mice uncover an essential meiotic function for the ancient RNA helicase YTHDC2
Source: eLife journal article supplement (doi:10.7554/elife.30919), 2018-01-23
Supplement: supp [file elife_poa_e30919_Figure_5_source_data_4.xlsx]

## Sheet: Sheet2
Figure 5−Source Data 4. Quantification of CCNA2 and SYCP3 immunofluorescence plotted in Figure 5F.
Mouse name	Number of SYCP3 positive cells	Number of CCNA2 positive cells	Number of SYCP3 and CCNA2 positive cells	Total cells	Percent of SYCP3 positive cells	Percent of CCNA2 positive cells	Percent of SYCP3 and CCNA2 positive cells
15 dppYthdc2+/+	9104	2154	23	20640	44.1085	10.436	0.111434
14 dpp Ythdc2+/+	6287	2862	310	18252	34.4455	15.6805	1.69844
12 dpp Ythdc2+/+	6026	2063	199	14819	40.664	13.9213	1.34287
15 dppYthdc2ketu/ketu	3438	4798	1335	20640	16.657	23.2461	6.46802
14 dpp Ythdc2ketu/ketu	2516	4517	1204	18252	13.7848	24.748	6.59654
12 dpp Ythdc2ketu/ketu	1687	3428	908	14819	11.384	23.1325	6.12727
p-value (two-sided Student’s t test comparing wild type and mutant)					0.00130447	0.0031129	0.000436084
