# Supplementary material for: ketu mutant mice uncover an essential meiotic function for the ancient RNA helicase YTHDC2
Source: eLife journal article supplement (doi:10.7554/elife.30919), 2018-01-23
Supplement: supp [file elife_poa_e30919_Figure_6_source_data_1.xlsx]

## Sheet: Sheet1
Figure 6−Source Data 1. FPKM valuesa of differentially expressed genes in purified testicular cells plotted in Figure 6C.
Cluster	ENSEMBL Gene ID	Gene name	Sertoli	Spermatogonia	Spermatocyte	Spermatid	Spermatozoa	aSoumillon etal., Cell Rep., 2013 (GEO GSE43717)
I	ENSMUSG00000027750	Postn	24.2236	176.749	3.69104	2.76945	0.00826516
I	ENSMUSG00000042834	Nrep	32.059	49.571	0.202965	0.792051	0.116143
I	ENSMUSG00000019647	Sema6a	0.0814696	25.4304	0.0207915	0.00389899	0.00267189
I	ENSMUSG00000039954	Stk32a	0.0211547	0.0699911	0.240781	0.0966111	0.0738631
I	ENSMUSG00000045629	Sh3tc2	2.61512	4.53754	0.584017	1.90385	0.0162799
I	ENSMUSG00000086782	E130102H24Rik	1.42384	1.12348	0.312334	0.0242636	11.1036
I	ENSMUSG00000030157	Clec2d	35.1899	9.11554	0.851483	0.141482	7.36645
I	ENSMUSG00000000420	Galnt1	31.3952	31.6525	1.20759	0.7757	20.286
I	ENSMUSG00000024378	Stard4	4.04026	9.88546	1.59568	0.511289	30.1172
I	ENSMUSG00000053644	Aldh7a1	23.6571	26.1488	5.42363	4.18097	18.5132
I	ENSMUSG00000032656	March3	1.32665	3.72084	4.94243	1.55044	0.487554
I	ENSMUSG00000043079	Synpo	42.5893	5.73733	0.766192	0.594182	1.2968
I	ENSMUSG00000036452	Arhgap26	1.86742	14.28	0.463257	1.49603	3.23976
I	ENSMUSG00000085289	Gm15337	0.015791	0.0158679	0	0	0.00493038
I	ENSMUSG00000024575	Pde6a	0.0028474	0.061034	0.0990233	0.110317	0.13067
I	ENSMUSG00000024610	Cd74	0.129101	38.1883	2.22809	3.82282	102.86
I	ENSMUSG00000041062	Mslnl	0.0221186	0.146329	0.0294583	0.0640769	0.00499711
I	ENSMUSG00000098488	Pla2g4b	Not present	Not present	Not present	Not present	Not present
I	ENSMUSG00000019179	Mdh2	158.099	140.23	15.6073	11.941	37.285
I	ENSMUSG00000029675	Eln	0.51837	114.47	0	0.0108819	0
I	ENSMUSG00000061462	Obscn	0.00340821	0.0232824	0.000448536	0.00368337	0.059198
I	ENSMUSG00000038128	Camk4	0.0536123	0.999879	6.96537	37.8838	0.0744368
I	ENSMUSG00000002799	Jag2	0.0231941	4.0033	1.37463	0.813027	0.251524
I	ENSMUSG00000059895	Ptp4a3	1.85454	1.71673	0.696515	3.28114	0.298257
I	ENSMUSG00000076281	Gm24270	0	0	0	0	0
I	ENSMUSG00000076258	Gm23935	4145.75	797.824	194.075	3936.52	148.147
I	ENSMUSG00000055148	Klf2	7.29449	12.0781	4.11076	8.24774	2.51627
I	ENSMUSG00000042444	Fam63b	3.4861	3.23338	0.922069	0.20034	4.16208
I	ENSMUSG00000038502	Ptov1	23.6662	43.5701	10.4639	15.1918	27.5604
I	ENSMUSG00000035885	Cox8a	79.2099	28.8102	7.83792	2.68788	20.267
II	ENSMUSG00000038718	Pbx3	6.15133	5.01233	2.90386	2.18143	2.8208
II	ENSMUSG00000022829	Stxbp5l	0	0.198742	0.128292	0.603642	0.0414031
II	ENSMUSG00000086022	Rad51ap2	0.0541202	0.0370387	0.997093	1.60704	0
II	ENSMUSG00000000440	Pparg	2.03124	2.09982	0.977784	0.920153	0.014989
II	ENSMUSG00000022113	Trim52	0.0403378	0.331276	1.59517	1.43824	0
II	ENSMUSG00000024878	Cbwd1	42.774	33.3867	63.3223	45.6428	8.32309
II	ENSMUSG00000005883	Spo11	0	0.195289	56.0812	21.749	0.0253358
II	ENSMUSG00000069825	Spata22	0	0.212012	9.03816	2.46727	0
II	ENSMUSG00000070336	Fbxo47	0.24199	0.337475	1.13714	3.14143	0.891243
II	ENSMUSG00000074704	Rad21l	0.10519	1.49061	1.07131	1.28166	0
II	ENSMUSG00000052525	Spdya	0.12789	0.30417	226.152	120.008	0.347472
II	ENSMUSG00000043410	Hfm1	0	0.468588	22.4997	9.13952	0.0153875
II	ENSMUSG00000052616	Terb1	0.821996	0.450329	27.8603	9.8301	1.01224
II	ENSMUSG00000085601	Gm4969	0	1.04472	2.49899	2.90213	0.0431097
II	ENSMUSG00000051592	Ccnb3	0.00565527	0.303472	0.195963	0.678246	0.00280782
II	ENSMUSG00000078796	Zfp541	0.0104661	0.137526	61.5844	49.5062	0.096475
II	ENSMUSG00000007035	Msh5	0.0985795	0.809313	3.41776	2.74512	0.465954
II	ENSMUSG00000086989	Gm16441	0	0.0170635	0.232445	0.758412	0
II	ENSMUSG00000087325	Gm6038	0	0.0167801	0.229294	0.944893	0
II	ENSMUSG00000024155	Meiob	0	0.130704	7.65451	4.4953	0.347874
II	ENSMUSG00000024905	Mtl5	0.257517	0.136509	67.9224	18.0063	0.0430416
II	ENSMUSG00000039683	Sdk1	0.215907	0.961475	0.228574	0.588677	0.895352
II	ENSMUSG00000030924	2610020H08Rik	0.864197	1.48356	56.8388	38.3584	1.64949
II	ENSMUSG00000027719	Adad1	0.00897605	1.00521	97.3363	127.701	0.0327881
II	ENSMUSG00000032065	Tex12	0	4.06487	26.4359	8.06556	0
II	ENSMUSG00000027379	Bub1	0.716321	4.86054	14.4545	16.8626	0.0790349
II	ENSMUSG00000079350	Magea8	0	2.01282	0.322288	0.665082	0.0084109
II	ENSMUSG00000035395	Pet2	0.00897763	1.61283	0.472289	2.16515	0
II	ENSMUSG00000050197	Rhox13	0	4.84248	3.88408	4.91678	0
II	ENSMUSG00000054727	1700013H16Rik	0	2.54875	16.0614	69.8346	0.0238126
II	ENSMUSG00000051977	Prdm9	0.801866	0.871828	1.86628	1.86677	9.50588
II	ENSMUSG00000038598	AI481877	0	0.389088	2.69279	1.35994	0.00542719
II	ENSMUSG00000057054	Inca1	1.29277	1.60224	14.6484	6.47931	3.73158
II	ENSMUSG00000022837	Iqcb1	8.70824	10.6496	27.8869	11.17	4.39248
II	ENSMUSG00000021187	Tc2n	0.0242911	1.11852	2.34187	5.04665	1.58126
II	ENSMUSG00000060445	Sycp2	0.00971508	2.38701	107.629	30.7697	0.195343
II	ENSMUSG00000011349	Dmrtc2	0	0.0432775	44.6702	24.4562	0.0514315
II	ENSMUSG00000109561	Ankrd31	Not present	Not present	Not present	Not present	Not present
II	ENSMUSG00000036928	Stag3	0.138775	19.1594	268.5	176.933	0.0785686
II	ENSMUSG00000022432	Smc1b	0.167695	13.5393	95.2055	110.238	0.138916
II	ENSMUSG00000047220	Ccdc36	0.023556	1.54303	12.065	4.3138	0.0684239
II	ENSMUSG00000034555	Tex16	0	1.22873	0.149448	0.812688	0
II	ENSMUSG00000027855	Sycp1	0.0851246	9.68436	100.55	65.5795	0.125999
II	ENSMUSG00000020059	Sycp3	0.42707	8.26839	204.307	70.4398	0.0993567
II	ENSMUSG00000032854	Ugt8a	0	0.235159	0.327381	0.516854	0
II	ENSMUSG00000028109	Hormad1	0	1.18337	63.3864	20.7954	0.00951497
II	ENSMUSG00000083620	Gm15529	0	3.51268	143.628	46.7292	0
III	ENSMUSG00000012350	Ehf	0	6.61685	0.0770575	0.0126403	62.6188
III	ENSMUSG00000031881	Cdh16	0	27.7928	0	0.00482002	2.25559
III	ENSMUSG00000000682	Cd52	4.20476	0.839314	0.194445	0.126886	505.137
III	ENSMUSG00000050074	Spink8	0.294857	61.6241	0.0669288	0	2135.14
III	ENSMUSG00000039269	2300002M23Rik	0	2.30198	0	0	3.39636
III	ENSMUSG00000025431	Crisp1	0	46.7656	0.00983792	0.0641975	6315.14
III	ENSMUSG00000018211	Wfdc15b	0	10.0682	0	0	193.89
III	ENSMUSG00000006570	Defb2	0	2.19956	0	0	48.0441
III	ENSMUSG00000029086	Prom1	0	17.9402	24.5523	39.8203	185.128
III	ENSMUSG00000040205	Cuzd1	0.0217918	0.375828	0.522413	1.33204	169.179
III	ENSMUSG00000021081	Serpina1f	0	0.147951	0.00736161	0.215464	1819.24
III	ENSMUSG00000032487	Ptgs2	21.0259	41.7339	0.0875563	0.0361198	1985.63
III	ENSMUSG00000029154	Cwh43	0	1.0551	0.0822901	0.0654854	57.3122
III	ENSMUSG00000050520	Cldn8	0	0.221713	0	0	27.2044
III	ENSMUSG00000074679	Defb28	0	0.517991	0	0.205561	88.234
III	ENSMUSG00000058019	Ces5a	0	0.13622	0	0	31.7812
IV	ENSMUSG00000070729	Gm12966	211.022	335.685	140.226	90.8606	397.914
IV	ENSMUSG00000021134	Srsf5	101.367	113.387	66.9402	28.6079	161.023
IV	ENSMUSG00000043456	Zfp536	0.0823842	0.0790677	0.308722	0.314564	0
IV	ENSMUSG00000038056	Kmt2c	1.2259	7.81265	0.900202	0.832566	16.2059
IV	ENSMUSG00000062296	Trank1	1.97666	16.2867	0.686661	0.73302	0.497193
IV	ENSMUSG00000092035	Peg10	39.7804	21.3434	0.614601	0.612396	0.0430762
IV	ENSMUSG00000063450	Syne2	6.42936	85.0292	10.5917	9.52461	289.426
IV	ENSMUSG00000069516	Lyz2	111.799	4.87463	1.78539	2.35118	13.5194
IV	ENSMUSG00000069515	Lyz1	4.02246	0.161935	0.146311	0.134645	0.675848
IV	ENSMUSG00000023868	Pde10a	0.623887	1.23875	12.0261	1.97562	7.2889
IV	ENSMUSG00000059482	2610301B20Rik	10.5221	7.65535	77.2967	24.9447	5.565
IV	ENSMUSG00000085492	Trmt61b	5.13591	8.78448	19.1566	4.09349	6.78902
IV	ENSMUSG00000074656	Eif2s2	349.817	260.135	142.16	83.4551	19.282
IV	ENSMUSG00000019832	Rab32	4.46087	7.70622	0.0500305	0.0136031	0.21005
IV	ENSMUSG00000023919	Cenpq	7.43633	5.40052	19.0816	4.04963	0.742453
IV	ENSMUSG00000071856	Mcc	1.27103	10.5559	0.152648	0.0744777	0.0593315
IV	ENSMUSG00000024481	Lvrn	0.127398	0.328476	0.280156	0.163076	0.0080322
IV	ENSMUSG00000073607	Gm10548	0.333152	0.875249	0.775492	0.505401	0.757619
IV	ENSMUSG00000034653	Ythdc2	1.07198	3.71029	3.33909	1.5485	1.33599
IV	ENSMUSG00000033022	Cdo1	1.3364	5.17353	0.656213	0.674582	27.3287
