# Supplementary material for: ketu mutant mice uncover an essential meiotic function for the ancient RNA helicase YTHDC2
Source: eLife journal article supplement (doi:10.7554/elife.30919), 2018-01-23
Supplement: supp [file elife_poa_e30919_Figure_6_source_data_3.xlsx]

## Sheet: Sheet1
Figure 6−Source Data 3. Expression fold changes of developmentally regulated genes plotted in Figure 6E.
	WT/Het 10d vs WT/Het 8d		Mut 8d vs WT/Het 8d
Gene name	Log2 fold change	padj	Log2 fold change	padj	m6A-containinga	aHsu etal., Cell Res., 2017 (GEO GSE98085)
Gm6119	0.623505	0.0805964	-0.251345	0.999998	FALSE
Gm6123	0.233777	0.0339955	-0.0437261	0.999998	FALSE
Atp6v1h	0.192691	0.061263	-0.0804916	0.999998	TRUE
Gm19026	0.322054	0.00864222	0.0259327	0.999998	FALSE
Arfgef1	0.16684	0.0983969	-0.0131025	0.999998	TRUE
Sulf1	1.31449	3.19145e-22	0.179739	0.999998	TRUE
Ncoa2	0.293031	0.000342622	0.0636039	0.999998	TRUE
Rdh10	0.353806	0.00486829	0.0216394	0.999998	TRUE
Ube2w	0.183605	0.0538128	-0.0587853	0.999998	TRUE
Gm5828	0.288438	0.0258835	0.129754	0.999998	FALSE
Paqr8	0.655668	1.03413e-09	0.090696	0.999998	TRUE
Rims1	0.740829	0.00147135	-0.540669	0.999998	FALSE
B3gat2	0.188663	0.0559919	-0.00697872	0.999998	FALSE
Smap1	0.187824	0.0344885	-0.0240921	0.999998	TRUE
Fam135a	0.677913	2.18504e-13	-0.0900303	0.999998	TRUE
Gm28439	0.389781	0.000174992	0.0480649	0.999998	FALSE
Gm10222	0.474237	8.2966e-05	0.0453953	0.999998	FALSE
Gm28438	0.291857	0.00282179	0.0432411	0.999998	FALSE
Gm28437	0.190263	0.0189732	0.0313294	0.999998	FALSE
Gm10925	0.218985	0.0310968	0.0456892	0.999998	FALSE
Gm28661	0.252633	0.00552633	0.00796404	0.999998	FALSE
Gm29216	0.247296	0.00172506	0.0204017	0.999998	FALSE
Khdrbs2	0.842942	0.0192824	-0.0269185	0.999998	FALSE
Prim2	0.303874	0.00149483	-0.0648204	0.999998	TRUE
Bend6	0.724955	0.00756348	-0.0603513	0.999998	FALSE
Ccdc115	0.375949	0.00025475	-0.0381389	0.999998	TRUE
Uggt1	0.200842	0.0198335	-0.0114048	0.999998	TRUE
Arid5a	0.429947	0.000647738	-0.0318671	0.999998	TRUE
Kansl3	0.298569	0.000429809	0.0637977	0.999998	TRUE
Cnnm4	0.565587	3.78365e-06	-0.133346	0.999998	TRUE
Fam178b	0.449515	0.00289035	-0.264073	0.999998	TRUE
Tsga10	0.61045	0.00123419	-0.0498357	0.999998	FALSE
Eif5b	0.174633	0.0850294	-0.100718	0.999998	TRUE
Npas2	1.04447	0.00117487	0.422706	0.999998	FALSE
Slc9a2	1.12163	0.0266991	-0.754991	0.999998	FALSE
Pou3f3	1.89423	0.0174783	1.29357	0.999998	FALSE
Uxs1	0.283624	0.0193205	0.066776	0.999998	FALSE
Tpp2	0.243795	0.00876494	-0.0693329	0.999998	TRUE
Tex30	0.41895	1.98417e-05	-0.138793	0.999998	TRUE
Gm29247	0.284448	0.011272	-0.115088	0.999998	FALSE
Gm9496	1.28603	0.00457364	-0.334923	0.999998	FALSE
Sdpr	0.258616	0.0181315	-0.0178134	0.999998	TRUE
Gm28177	0.427113	2.25778e-06	0.079065	0.999998	FALSE
Stat1	0.43965	1.10764e-07	0.0924093	0.999998	TRUE
Gls	0.381864	7.22546e-05	-0.0850019	0.999998	TRUE
Pgap1	0.249613	0.0357563	-0.123856	0.999998	FALSE
Mars2	0.50284	3.51766e-05	-0.131352	0.999998	TRUE
Boll	1.01505	9.88117e-15	-0.424586	0.999998	FALSE
Gm38056	0.364103	0.000584169	-0.00734022	0.999998	FALSE
Gm6644	0.341353	0.00217787	-0.00853785	0.999998	TRUE
Stradb	0.547673	3.13748e-06	-0.14123	0.999998	TRUE
Als2cr11	1.15752	0.000607762	-0.452276	0.999998	TRUE
Fam117b	0.205663	0.0421405	-0.0782224	0.999998	TRUE
Ica1l	0.330002	0.0364697	-0.0295517	0.999998	FALSE
Nbeal1	0.360928	0.00517667	-0.0212446	0.999998	TRUE
Raph1	0.353613	0.00548895	-0.0760586	0.999998	TRUE
Ndufs1	0.185146	0.0286864	-0.0503669	0.999998	TRUE
Ccnyl1	0.218362	0.0448108	-0.179627	0.999998	TRUE
Fzd5	0.429995	1.707e-05	0.030135	0.999998	TRUE
Gm38058	0.4586	0.0505529	-0.192438	0.999998	FALSE
Pikfyve	0.540655	1.03413e-09	-0.0410379	0.999998	TRUE
Mreg	0.612078	8.09767e-05	-0.424507	0.878607	TRUE
Igfbp2	0.476504	4.70249e-06	-0.206274	0.999998	FALSE
Pnkd	0.303957	0.00102763	0.0790355	0.999998	TRUE
Plcd4	0.415612	0.0126799	0.042202	0.999998	FALSE
Zfp142	0.404599	0.00062107	-0.0186096	0.999998	TRUE
Tuba4a	0.328709	0.0247171	-0.144605	0.999998	TRUE
Dnajb2	0.267485	0.0203718	0.0105002	0.999998	TRUE
Dnpep	0.236931	0.0125394	0.0465996	0.999998	TRUE
Stk11ip	0.209064	0.0593938	-0.0737313	0.999998	TRUE
Slc4a3	0.327996	0.0407137	0.252627	0.999998	TRUE
Ap1s3	0.820647	0.00034944	-0.190044	0.999998	TRUE
Gm5529	0.230822	0.0155096	0.168675	0.999998	FALSE
Cul3	0.166988	0.0696732	-0.0599406	0.999998	TRUE
Rhbdd1	0.254637	0.0712011	-0.00423148	0.999998	TRUE
Trip12	0.174262	0.0559919	-0.0541933	0.999998	TRUE
Fbxo36	0.434071	0.042871	-0.0769305	0.999998	TRUE
Itm2c	0.203769	0.0223996	0.0528304	0.999998	TRUE
4933407L21Rik	1.31078	0.00338801	-0.570198	0.999998	FALSE
Gm28884	1.63267	0.000492161	0.233914	0.999998	FALSE
Gpr55	1.56614	7.85288e-21	-0.101408	0.999998	TRUE
Gm28100	1.6697	0.0117981	0.0335803	0.999998	FALSE
Pde6d	0.323331	0.00160111	-0.00185515	0.999998	TRUE
Efhd1	0.384401	9.65587e-05	0.00288309	0.999998	TRUE
Efhd1os	0.436432	0.0337132	-0.154349	0.999998	FALSE
Gigyf2	0.226955	0.0281364	-0.0534157	0.999998	TRUE
Gm17181	0.282891	0.0955896	0.129391	0.999998	FALSE
Atg16l1	0.303965	0.00268825	-0.126086	0.999998	TRUE
Dgkd	0.392504	5.21416e-07	-0.0599716	0.999998	TRUE
Mroh2a	0.873482	4.00742e-07	-0.154997	0.999998	FALSE
Arl4c	0.571011	1.66967e-05	0.0120812	0.999998	TRUE
Ackr3	0.537847	1.18148e-05	-0.0379793	0.999998	TRUE
Cops8	0.244459	0.0108247	-0.0582477	0.999998	TRUE
Mlph	1.25257	0.0806381	0.192844	0.999998	FALSE
Rbm44	0.473544	8.13342e-05	-0.340475	0.999998	TRUE
Ramp1	1.39824	8.19873e-06	0.543579	0.999998	FALSE
Gm26683	0.586893	0.0946365	0.187346	0.999998	FALSE
Fam132b	0.717977	0.0270523	-0.326782	0.999998	FALSE
Ilkap	0.193033	0.0844789	-0.0175879	0.999998	TRUE
Asb1	0.736265	2.13384e-13	0.00134087	0.999998	TRUE
Rnpepl1	0.303258	0.00112927	0.10777	0.999998	TRUE
Capn10	0.655089	3.2246e-11	0.130529	0.999998	TRUE
Pask	0.208615	0.0297872	-0.128122	0.999998	TRUE
Stk25	0.182101	0.0488575	-0.032368	0.999998	TRUE
Atg4b	0.196682	0.044171	0.0014122	0.999998	TRUE
2310035C23Rik	0.552312	6.14459e-11	-0.0888327	0.999998	TRUE
Phlpp1	0.239856	0.0336166	-0.0667158	0.999998	TRUE
Cdh19	1.68692	0.00164046	-0.699975	0.999998	FALSE
Clasp1	0.201237	0.0433568	0.0332419	0.999998	TRUE
Tfcp2l1	0.648085	4.49471e-07	0.089187	0.999998	TRUE
Ralb	0.748486	8.03776e-17	-0.0175739	0.999998	TRUE
Tmem185b	0.268323	0.0109848	0.0176506	0.999998	TRUE
Epb41l5	0.363477	3.14612e-05	-0.0400402	0.999998	FALSE
Ptpn4	0.277242	0.00141833	-0.0214631	0.999998	TRUE
Dbi	0.229292	0.0637577	0.0263075	0.999998	FALSE
Insig2	0.35171	0.000153567	0.0283472	0.999998	TRUE
Mgat5	0.233775	0.0167843	0.0436699	0.999998	TRUE
Rab3gap1	0.199692	0.0637917	-0.00408432	0.999998	TRUE
R3hdm1	0.245003	0.00681227	0.00379155	0.999998	TRUE
Cxcr4	0.332685	0.0871807	-0.00490977	0.999998	FALSE
Gm29427	0.517569	0.00881436	0.107861	0.999998	FALSE
Pfkfb2	0.553696	6.53888e-05	0.0176764	0.999998	TRUE
Yod1	0.309812	0.0461381	-0.00756743	0.999998	TRUE
Srgap2	0.19155	0.0965407	0.0059452	0.999998	TRUE
Gm7241	0.547048	0.0448978	-0.112984	0.999998	FALSE
Nfasc	0.672783	0.0465659	-0.0782043	0.999998	FALSE
Plekha6	0.795605	8.72109e-09	-0.101825	0.999998	TRUE
Gm15851	0.66383	0.0170542	-0.0777753	0.999998	FALSE
Prelp	0.571355	1.37829e-05	-0.157634	0.999998	TRUE
Mybph	0.356986	0.00122038	0.179288	0.999998	FALSE
Adora1	0.355329	0.000433953	0.145183	0.999998	TRUE
Kdm5b	0.280108	0.00290552	-0.0646984	0.999998	TRUE
Gm28892	0.853756	0.0359865	0.0789924	0.999998	FALSE
Ube2t	0.677457	2.71599e-08	-0.137598	0.999998	TRUE
Ptprv	0.561202	0.00752721	0.357177	0.999998	TRUE
Tnnt2	0.519689	0.0030376	-0.0286826	0.999998	FALSE
Zfp281	0.19521	0.0736025	-0.030871	0.999998	TRUE
Gm29718	0.343942	0.0599861	0.129058	0.999998	FALSE
Cdc73	0.203331	0.0218143	0.0125296	0.999998	TRUE
Ptgs2	3.46317	3.03516e-10	1.08993	0.999998	FALSE
Swt1	0.687335	1.05605e-15	-0.142266	0.999998	TRUE
Rgl1	0.349362	1.41029e-05	-0.0329618	0.999998	TRUE
Smg7	0.244215	0.0138468	-0.0826084	0.999998	TRUE
Shcbp1l	0.626396	0.0111322	-0.451211	0.999998	TRUE
Teddm2	0.475265	0.0192776	-0.149205	0.999998	FALSE
Mir8114	0.658639	0.0114892	-0.266669	0.999998	FALSE
Soat1	0.601123	3.7966e-09	-0.0311865	0.999998	TRUE
Rasal2	0.303286	0.00153371	0.0256481	0.999998	TRUE
Rabgap1l	0.911701	7.02475e-21	-0.119182	0.999998	TRUE
Gm36975	1.1791	0.00234764	0.136055	0.999998	FALSE
Prdx6	0.352091	0.00232237	0.00822447	0.999998	FALSE
Gm5049	1.58237	0.000444957	0.129557	0.999998	FALSE
Suco	0.236765	0.00295105	0.0330638	0.999998	TRUE
Dnm3	1.00745	1.82229e-13	0.10801	0.999998	TRUE
Gm10176	1.39168	0.0651436	-0.202302	0.999998	FALSE
Scyl3	0.225722	0.0382566	-0.00409102	0.999998	TRUE
BC055324	0.347158	0.000228401	-0.127331	0.999998	TRUE
Slc19a2	0.205641	0.029281	0.0280336	0.999998	TRUE
Ccdc181	0.48865	7.12569e-05	-0.0614241	0.999998	FALSE
Blzf1	0.351479	0.000738513	-0.0461484	0.999998	TRUE
Nme7	0.375847	0.000493176	0.00336081	0.999998	TRUE
Atp1b1	0.897975	3.66202e-15	-0.0891476	0.999998	TRUE
Sft2d2	0.247253	0.00266391	0.0352527	0.999998	TRUE
Dcaf6	0.572019	6.84086e-10	-0.122905	0.999998	TRUE
Creg1	0.314718	0.00170957	0.0382977	0.999998	TRUE
Mael	0.285969	0.0276665	-0.319428	0.999998	TRUE
Gm16418	0.363367	0.00799938	-0.142359	0.999998	FALSE
Aldh9a1	0.224941	0.0561479	-0.0901846	0.999998	TRUE
Uap1	0.322474	0.000583914	-0.0895475	0.999998	FALSE
Atf6	0.24974	0.00962166	-5.89629e-05	0.999998	TRUE
Dusp12	0.239385	0.0824512	0.10274	0.999998	TRUE
Pcp4l1	0.263275	0.073918	-0.0216877	0.999998	TRUE
B4galt3	0.253961	0.0219482	0.103649	0.999998	TRUE
Ncstn	0.152882	0.0713721	0.0531095	0.999998	TRUE
Ackr1	1.07232	0.00858253	-0.419828	0.999998	FALSE
Cadm3	1.04467	1.38222e-14	0.0446749	0.999998	TRUE
Akt3	0.211253	0.0406819	-0.114511	0.999998	TRUE
Zbtb18	0.371934	0.000127111	-0.0569928	0.999998	TRUE
Gm16432	0.946848	0.0656529	0.00580272	0.999998	FALSE
Efcab2	0.463455	0.00272692	-0.0588242	0.999998	FALSE
Coq8a	0.180805	0.0717933	-0.00272572	0.999998	FALSE
Trp53bp2	0.193009	0.0801464	-0.0212358	0.999998	TRUE
Rab3gap2	0.356897	0.000356965	-0.144738	0.999998	TRUE
D1Pas1	0.238217	0.0865224	-0.227054	0.999998	TRUE
Kctd3	0.293667	0.000993564	-0.0296571	0.999998	TRUE
Angel2	0.17947	0.071671	-0.0731524	0.999998	TRUE
1700034H15Rik	0.520002	0.0360094	-0.13776	0.999998	FALSE
Slc30a1	0.192189	0.0403851	-0.0581459	0.999998	TRUE
Syt14	0.315584	0.00116054	-0.0804857	0.999998	TRUE
Irf6	1.00508	5.83867e-05	0.271086	0.999998	FALSE
Nmt2	0.220288	0.0149012	-0.109286	0.999998	TRUE
Meig1	0.967745	6.08181e-06	0.0328382	0.999998	FALSE
Dclre1c	0.318161	0.00750359	0.00317459	0.999998	TRUE
Suv39h2	0.228906	0.062412	-0.178727	0.999998	TRUE
Proser2	0.222356	0.0813486	-0.103053	0.999998	TRUE
Sfmbt2	0.674019	6.12283e-10	-0.248781	0.999998	TRUE
Pfkfb3	0.603079	4.28493e-08	0.13408	0.999998	TRUE
Fam188a	0.398406	0.00169638	0.0194829	0.999998	TRUE
Mrc1	0.278041	0.0101275	0.0475421	0.999998	TRUE
Mllt10	0.404199	1.29471e-05	-0.0135172	0.999998	TRUE
Bmi1	0.386508	0.000134171	-0.142279	0.999998	TRUE
Enkur	0.496712	0.0926855	-0.134365	0.999998	FALSE
Gm13341	0.291018	0.00107352	-0.00106468	0.999998	FALSE
Gm13340	0.315908	7.54591e-05	-0.0155239	0.999998	FALSE
Gm13339	0.289	0.0010064	0.0757201	0.999998	FALSE
Pdss1	0.373483	0.0321268	-0.0869641	0.999998	TRUE
Abi1	0.312278	7.54591e-05	-0.0553996	0.999998	TRUE
Acbd5	0.329166	0.000190623	0.0402115	0.999998	TRUE
Cacna1b	0.874795	0.001359	-0.00692732	0.999998	TRUE
Zmynd19	0.239337	0.0169004	-0.125078	0.999998	TRUE
Ndor1	0.26995	0.0223366	-0.0409246	0.999998	TRUE
Tprn	0.258562	0.0505287	-0.100406	0.999998	TRUE
Abca2	0.489565	5.71974e-09	-0.0493989	0.999998	TRUE
Camsap1	0.252384	0.00885011	-0.0381091	0.999998	TRUE
Ubac1	0.246963	0.0206483	-0.14868	0.999998	TRUE
Qsox2	0.261968	0.00256417	0.00314401	0.999998	FALSE
Ccdc187	0.700801	0.0495274	-0.0447806	0.999998	FALSE
Gpsm1	0.177962	0.0656529	0.0512263	0.999998	TRUE
0610009E02Rik	0.714275	5.57234e-08	0.0696257	0.999998	FALSE
Gm13568	0.815123	0.00235731	0.2754	0.999998	FALSE
Notch1	0.847768	1.67668e-13	0.00312799	0.999998	TRUE
Ak8	0.857568	0.013495	-0.190261	0.999998	FALSE
Ddx31	0.252343	0.0364371	-0.158572	0.999998	TRUE
Med27	0.449329	0.000491072	-0.127082	0.999998	TRUE
Gm13402	0.564288	0.0297555	-0.0150222	0.999998	FALSE
Zdhhc12	0.338911	0.018605	0.0341522	0.999998	TRUE
Kyat1	0.436369	0.0161658	-0.0258693	0.999998	FALSE
Nup188	0.211512	0.0335613	-0.0475032	0.999998	TRUE
Dolpp1	0.339999	0.0196021	0.0065484	0.999998	TRUE
Usp20	0.31509	0.0268371	-0.0451978	0.999998	TRUE
Fibcd1	0.952704	0.0185096	-0.105814	0.999998	FALSE
Fam78a	0.456199	0.000134657	-0.023556	0.999998	TRUE
Uck1	0.30201	0.000955086	-0.0318711	0.999998	TRUE
Ptges2	0.33534	0.00592705	-0.0399488	0.999998	TRUE
Slc25a25	0.365789	0.000215217	-0.061686	0.999998	TRUE
Fam102a	1.01107	4.93365e-22	-0.00181315	0.999998	TRUE
Stxbp1	0.589652	7.87937e-06	-0.0699563	0.999998	TRUE
Lrsam1	0.270634	0.0222172	-0.0299179	0.999998	TRUE
Garnl3	0.945634	1.52175e-14	-0.0579708	0.999998	TRUE
Pbx3	0.56382	4.64153e-05	-0.0329816	0.999998	TRUE
Hspa5	0.172641	0.030238	0.0548846	0.999998	TRUE
Cntrl	0.51488	2.55646e-06	-0.097684	0.999998	TRUE
Mrrf	0.303325	0.0174456	-0.0272322	0.999998	TRUE
Ptgs1	1.10209	0.0116302	0.799997	0.999998	FALSE
Rc3h2	0.364196	0.000131425	-0.0607783	0.999998	TRUE
Rabgap1	0.188959	0.0372853	0.0463193	0.999998	TRUE
Strbp	0.51585	4.09894e-08	-0.122369	0.999998	TRUE
Lhx2	0.971472	4.70115e-05	-0.128366	0.999998	FALSE
Nr6a1	0.742781	6.46679e-12	-0.209293	0.999998	TRUE
Gtdc1	0.210449	0.0624645	-0.0580588	0.999998	TRUE
Kif5c	0.460815	1.57034e-05	-0.0232125	0.999998	TRUE
Neb	0.86187	2.90399e-08	0.0497245	0.999998	FALSE
Bloc1s2-ps	0.471841	0.00412416	-0.102374	0.999998	FALSE
Cytip	0.653241	3.60845e-07	-0.0193307	0.999998	TRUE
Gm13546	1.58361	0.0303331	0.648358	0.999998	FALSE
Ly75	0.631178	8.61355e-05	-0.253435	0.999998	FALSE
Pla2r1	0.857722	2.10829e-07	-0.123241	0.999998	FALSE
Tank	0.424959	6.96402e-05	0.101146	0.999998	TRUE
Ifih1	0.614059	9.22456e-05	0.124315	0.999998	FALSE
Gca	0.623174	4.80327e-07	0.136764	0.999998	TRUE
Kcnh7	0.524728	0.0183537	0.155525	0.999998	FALSE
Ttc21b	0.266707	0.0106499	-0.0919033	0.999998	TRUE
Stk39	0.23431	0.0204468	0.0515029	0.999998	TRUE
Lrp2	1.15106	5.63326e-06	0.201312	0.999998	FALSE
Fastkd1	0.347467	0.00347418	-0.0200268	0.999998	TRUE
Ubr3	0.469592	6.41786e-07	-0.0341927	0.999998	FALSE
Gm13642	0.227906	0.0761113	-0.105584	0.999998	FALSE
Dlx1	0.646483	0.0128495	-0.463853	0.999998	FALSE
Chn1	0.335917	0.00331751	-0.183016	0.999998	TRUE
Lnpk1	0.503932	6.3316e-05	-0.061703	0.999998	FALSE
Prkra	0.172085	0.0956825	0.127617	0.999998	TRUE
Plekha3	0.218398	0.0353982	-0.0505761	0.999998	TRUE
Sestd1	0.219815	0.0204614	-0.0068407	0.999998	TRUE
Gm13651	0.22963	0.0665595	-0.160944	0.999998	FALSE
Zfp385b	1.56326	1.81921e-34	-0.182086	0.999998	FALSE
Ssfa2	0.3915	3.47736e-06	-0.0639923	0.999998	TRUE
Frzb	1.31679	0.000947924	0.275903	0.999998	TRUE
Nckap1	0.162048	0.0564703	0.0445692	0.999998	TRUE
Fam171b	0.278738	0.0821805	-0.144311	0.999998	TRUE
Btbd18	0.552311	2.26874e-05	-0.360139	0.999998	TRUE
Med19	0.279016	0.00964351	-0.0325981	0.999998	TRUE
Olfr1032	1.63169	0.093329	0.953682	0.999998	FALSE
Olfr1033	0.716794	0.0228102	0.0117366	0.999998	FALSE
Ptprj	0.315227	0.0368099	-0.0789655	0.999998	TRUE
Agbl2	0.711532	0.0459226	-0.201071	0.999998	FALSE
Madd	0.801488	1.10646e-10	-0.246112	0.999998	FALSE
Ddb2	0.670802	4.76014e-10	0.0148441	0.999998	TRUE
Arhgap1	0.160131	0.0833525	-0.00279761	0.999998	TRUE
Atg13	0.220649	0.0335127	-0.0345019	0.999998	TRUE
Cry2	0.187325	0.0628449	-0.00244713	0.999998	TRUE
Pdhx	0.20612	0.0361565	-0.0139715	0.999998	TRUE
Ehf	2.11947	0.00469852	1.38606	0.999998	FALSE
Abtb2	0.274281	0.000888034	0.0390083	0.999998	TRUE
Prrg4	0.66451	0.00421396	-0.0803883	0.999998	FALSE
Ccdc73	0.367911	0.00801673	-0.0892065	0.999998	FALSE
Mpped2	0.400906	0.0141575	-0.19484	0.999998	TRUE
Gm13904	0.252585	0.0619649	-0.0527977	0.999998	FALSE
Lpcat4	0.507294	0.00138919	-0.11141	0.999998	FALSE
Nutm1	0.611536	3.53612e-06	-0.378269	0.809895	TRUE
Fsip1	0.685305	0.0195479	-0.176171	0.999998	FALSE
Srp14	0.276721	0.00422312	-0.105228	0.999998	TRUE
Bmf	0.214887	0.0327723	-0.0160128	0.999998	TRUE
Disp2	2.1793	0.00483824	0.712399	0.999998	FALSE
Ivd	0.277382	0.00288423	0.00286517	0.999998	TRUE
Bahd1	0.574274	9.42518e-07	-0.102235	0.999998	TRUE
Rpusd2	0.296762	0.0479159	-0.111654	0.999998	TRUE
Gm14137	2.13075	0.0272917	-0.0837491	0.999998	FALSE
Spint1	0.470169	9.69171e-05	-0.309714	0.999998	TRUE
Rhov	0.794	0.00450088	-0.354323	0.999998	FALSE
Vps18	0.383793	7.32058e-05	-0.0171054	0.999998	TRUE
Ino80	0.286025	0.00850576	-0.00199681	0.999998	TRUE
Exd1	0.405048	0.0286266	-0.318045	0.999998	TRUE
Chp1	0.237084	0.00874452	-0.0390797	0.999998	TRUE
Oip5	0.356893	0.0135129	-0.0642793	0.999998	TRUE
Pla2g4b	0.449876	0.0489537	0.359957	0.999998	TRUE
Sptbn5	0.564264	0.0292458	0.0292428	0.999998	FALSE
Ehd4	0.189385	0.0944418	-0.0926204	0.999998	TRUE
Haus2	0.203443	0.072697	0.0190229	0.999998	TRUE
Trp53bp1	0.173954	0.0941365	-0.0504006	0.999998	TRUE
Catsper2	0.67642	0.0991298	0.27967	0.999998	TRUE
Serinc4	0.156627	0.0982294	0.0586856	0.999998	FALSE
Spg11	0.250395	0.0191805	-0.10119	0.999998	TRUE
Patl2	1.28571	0.000484063	-0.222686	0.999998	FALSE
Terb2	1.52188	1.41264e-05	-0.30122	0.999998	FALSE
Sord	0.314151	0.0160186	-0.0891423	0.999998	TRUE
Duox2	1.67708	0.03964	-0.059976	0.999998	FALSE
Duox1	1.6317	0.0811889	-0.00297954	0.999998	FALSE
Gatm	0.388362	9.65587e-05	0.02261	0.999998	TRUE
Slc30a4	0.364287	1.17761e-05	-0.0105208	0.999998	TRUE
Shc4	0.441702	4.20734e-05	-0.0761201	0.999998	TRUE
Secisbp2l	0.167107	0.0743853	0.00597846	0.999998	TRUE
Slc27a2	0.939482	0.000412446	-0.40985	0.999998	TRUE
Hdc	0.302278	0.017707	0.0795675	0.999998	TRUE
Usp8	0.234672	0.0136463	0.00890106	0.999998	TRUE
Gm10774	0.258925	0.064988	-0.0657507	0.999998	FALSE
Stard7	0.218868	0.0186259	-0.0213337	0.999998	TRUE
Dusp2	0.472043	0.0443807	-0.315544	0.999998	TRUE
Gpat2	0.538528	5.19689e-05	-0.240037	0.999998	TRUE
Prom2	2.63698	1.1418e-06	0.917739	0.999998	FALSE
Bub1	0.316536	0.000145028	-0.188394	0.999998	TRUE
Mertk	0.442728	0.000115753	0.0524918	0.999998	TRUE
Tmem87b	0.211544	0.0383398	-0.0793791	0.999998	TRUE
Zc3h8	0.495607	0.032015	-0.138648	0.999998	TRUE
Gm14026	0.263371	0.00576067	-0.0407668	0.999998	FALSE
Vps16	0.310001	0.00267927	-0.0308951	0.999998	FALSE
Lzts3	0.369339	0.0419229	0.0614695	0.999998	TRUE
4930402H24Rik	0.391384	2.75042e-05	0.0765583	0.999998	TRUE
Ap5s1	0.290208	0.0339717	0.0976353	0.999998	TRUE
Mavs	0.279788	0.00689238	0.0209697	0.999998	TRUE
Smox	0.679096	2.42428e-11	0.0920604	0.999998	TRUE
Rassf2	0.899197	5.71735e-12	0.0987113	0.999998	TRUE
Gpcpd1	0.324705	0.01666	-0.0903734	0.999998	FALSE
Trmt6	0.185546	0.0495274	-0.0471692	0.999998	TRUE
Mcm8	0.277068	0.021976	-0.154463	0.999998	TRUE
Crls1	0.370444	0.000225136	0.0562478	0.999998	TRUE
Macrod2	0.574203	0.000492586	-0.1383	0.999998	TRUE
Dzank1	0.93225	4.09152e-07	-0.0487312	0.999998	FALSE
Sec23b	0.285263	0.00447091	-0.0850221	0.999998	TRUE
Slc24a3	0.739656	1.12168e-09	0.0947924	0.999998	TRUE
Cfap61	0.953083	0.0124626	-0.244547	0.999998	FALSE
Ralgapa2	0.362472	8.69988e-05	0.107809	0.999998	TRUE
8030411F24Rik	0.335695	0.0161431	-0.0122005	0.999998	FALSE
Cst12	0.203403	0.0479571	0.0989678	0.999998	TRUE
Cst9	0.414163	5.16093e-05	0.0792583	0.999998	TRUE
Cst3	0.189305	0.0400141	0.0222019	0.999998	FALSE
Acss1	0.288638	0.00149892	0.138581	0.999998	TRUE
Abhd12	0.179163	0.0908203	0.0108868	0.999998	TRUE
Ninl	0.164783	0.0730748	0.0461693	0.999998	TRUE
Rad21l	1.63861	8.28184e-29	-0.293045	0.999998	FALSE
Rspo4	0.309136	0.0870347	-0.213063	0.999998	TRUE
Slc52a3	0.768698	7.8127e-16	0.105638	0.999998	TRUE
Defb28	5.69348	3.44592e-05	2.18371	0.999998	FALSE
Defb19	0.596715	6.20476e-10	0.10171	0.999998	FALSE
Defb45	3.16394	2.82173e-07	0.490943	0.999998	FALSE
Defb36	0.884084	3.39878e-11	-0.022377	0.999998	TRUE
Bcl2l1	0.199843	0.0524265	-0.0184565	0.999998	TRUE
Dusp15	0.836013	1.46741e-09	0.102161	0.999998	TRUE
Pdrg1	0.224071	0.02546	0.00170933	0.999998	FALSE
Kif3b	0.287634	0.00430272	0.0635992	0.999998	TRUE
Gm14497	0.359804	0.0937985	0.0471141	0.999998	FALSE
Cdk5rap1	0.505507	0.00038436	0.104292	0.999998	FALSE
Snta1	0.35819	0.0648049	-0.0465653	0.999998	TRUE
Necab3	0.63358	0.0502458	0.176592	0.999998	FALSE
Gm14226	0.579649	9.36864e-11	0.103535	0.999998	FALSE
Itch	0.287243	0.000913119	0.0244175	0.999998	TRUE
Trp53inp2	0.341934	3.25251e-05	0.0170123	0.999998	TRUE
Acss2	0.579037	2.54397e-07	-0.149924	0.999998	TRUE
Acss2os	0.720746	0.00872276	-0.0873143	0.999998	FALSE
Edem2	0.309359	0.00230642	-0.00245899	0.999998	TRUE
Nfs1	0.271115	0.00887496	-0.0269972	0.999998	TRUE
Dlgap4	0.291953	0.000741025	0.0264068	0.999998	TRUE
Tgif2	0.199476	0.0226901	0.000275447	0.999998	TRUE
5430405H02Rik	0.189421	0.0390935	0.00448589	0.999998	TRUE
Lbp	0.575656	0.00234367	0.157634	0.999998	TRUE
Snhg17	0.329043	0.0636802	0.0668772	0.999998	FALSE
Snhg11	0.817516	0.0911086	-0.55367	0.999998	TRUE
Ralgapb	0.3329	0.00015797	-0.0524833	0.999998	TRUE
Dhx35	0.281173	0.00498396	-0.0354113	0.999998	TRUE
Zhx3	0.176033	0.0688188	0.103354	0.999998	TRUE
Ptprt	0.899254	0.000851509	-0.0711373	0.999998	FALSE
Tomm34	0.54161	2.55044e-06	-0.0666293	0.999998	TRUE
Wfdc15a	0.65131	0.0407669	-0.204261	0.999998	TRUE
Wfdc15b	4.23843	0.00380424	1.56771	0.999998	FALSE
Pigt	0.29676	0.00144331	-0.0616911	0.999998	TRUE
Wfdc2	0.577576	0.0991965	0.0135028	0.999998	TRUE
Wfdc6a	0.576493	7.58053e-05	0.00934449	0.999998	FALSE
Eppin	1.92008	2.17376e-10	0.00568408	0.999998	TRUE
Wfdc8	0.869241	0.00367368	0.126145	0.999998	TRUE
Wfdc6b	0.758156	7.69712e-08	0.0413932	0.999998	FALSE
Wfdc16	7.16545	2.59707e-06	4.98529	0.999998	FALSE
Wfdc9	1.25443	3.32463e-11	0.096	0.999998	FALSE
Wfdc10	0.687557	3.61525e-16	0.103457	0.999998	TRUE
Zswim3	0.352049	0.00907128	-0.155006	0.999998	TRUE
Slc35c2	0.265708	0.0176693	-0.0664536	0.999998	TRUE
Ncoa3	0.33356	0.000368035	-0.123506	0.999998	TRUE
Prex1	0.239654	0.0403886	-0.138621	0.999998	TRUE
Arfgef2	0.390378	8.16376e-05	-0.085143	0.999998	TRUE
Znfx1	0.331973	0.00101731	-0.00613774	0.999998	TRUE
B4galt5	0.280278	0.00599643	-0.104219	0.999998	TRUE
Rnf114	0.30791	0.000990163	-0.159699	0.999998	TRUE
Pard6b	0.156327	0.0944344	0.0168421	0.999998	TRUE
Dpm1	0.218094	0.0399221	-0.0418471	0.999998	TRUE
Nfatc2	0.256445	0.0342682	0.0505828	0.999998	TRUE
Sall4	0.26571	0.0213508	-0.222911	0.999998	TRUE
Fam210b	0.319249	0.0146701	0.00498718	0.999998	TRUE
Spo11	2.15521	3.34859e-06	-0.887066	0.999998	FALSE
Rae1	0.26603	0.00796691	-0.163102	0.999998	TRUE
Rbm38	0.238275	0.0766982	-0.263126	0.999998	TRUE
Ctcfl	2.08271	4.77366e-22	-0.696183	0.999998	TRUE
Ctcflos	1.86368	0.000645989	-0.735791	0.999998	FALSE
Pck1	1.72262	0.0122831	0.719846	0.999998	FALSE
Vapb	0.463283	7.87622e-08	0.00745225	0.999998	TRUE
Slmo2	0.245945	0.0119183	-0.0304744	0.999998	FALSE
Sycp2	1.85703	9.52655e-35	-0.499016	0.999998	TRUE
Fam217b	0.285979	0.0408735	-0.0831576	0.999998	TRUE
Taf4	0.36982	0.00182397	-0.0487438	0.999998	FALSE
Lsm14b	0.279512	0.00141259	-0.122088	0.999998	TRUE
Ss18l1	0.812107	1.15565e-10	-0.0333028	0.999998	TRUE
Adrm1	0.180889	0.0487332	0.0046847	0.999998	TRUE
Cables2	0.398501	0.000208603	-0.172569	0.999998	TRUE
Mrgbp	0.300743	0.0197478	-0.0834086	0.999998	FALSE
Tcfl5	0.472575	0.00143294	-0.176639	0.999998	TRUE
Gid8	0.174959	0.0858506	-0.079052	0.999998	TRUE
Arfrp1	0.24336	0.0263026	-0.0883641	0.999998	TRUE
Zgpat	0.339298	0.00264413	0.0642573	0.999998	TRUE
Lime1	0.465696	0.0176517	0.259977	0.999998	TRUE
Slc2a4rg-ps	1.09986	0.0727671	0.503142	0.999998	FALSE
Uckl1	0.568194	0.000140653	0.136495	0.999998	TRUE
Uckl1os	0.648881	0.000295899	0.0484639	0.999998	FALSE
Hey1	0.731269	6.80185e-05	-0.267368	0.999998	TRUE
Fabp4	1.9632	0.0781404	-0.0443908	0.999998	FALSE
Snx16	0.659619	5.74974e-07	-0.124201	0.999998	TRUE
E2f5	0.485663	7.74111e-06	-0.0569998	0.999998	TRUE
Car13	0.735177	0.0222188	-0.0247852	0.999998	FALSE
Car3	2.26427	0.0684349	-0.405635	0.999998	FALSE
Bhlhe22	1.38125	0.000158945	-0.291988	0.999998	FALSE
Hps3	0.257269	0.0106668	0.0232123	0.999998	TRUE
Tnik	0.378432	0.000139398	0.00942617	0.999998	TRUE
Gpr160	1.25729	6.24284e-05	-0.302195	0.999998	TRUE
Cldn11	1.13681	0.000171901	-0.00922897	0.999998	TRUE
Mfn1	0.43299	7.03714e-05	-0.0839152	0.999998	TRUE
4932438A13Rik	0.328632	0.010949	-0.0566719	0.999998	TRUE
Adad1	0.718406	1.14675e-06	-0.410331	0.999998	TRUE
Spata5	0.468011	1.6478e-05	-0.23954	0.999998	TRUE
Intu	0.286844	0.0510364	-0.0759006	0.999998	TRUE
Slc25a31	0.405312	0.000698204	-0.397315	0.321766	TRUE
Hspa4l	0.929921	1.4362e-14	-0.167216	0.999998	TRUE
Gm2011	1.07403	0.00240842	0.305203	0.999998	FALSE
Abhd18	0.687435	0.00027118	0.0428287	0.999998	FALSE
Larp1b	0.97551	2.96541e-19	-0.306997	0.999998	TRUE
Jade1	0.148669	0.0811211	-0.0157931	0.999998	TRUE
Mgarp	0.375993	0.00021696	-0.00967084	0.999998	TRUE
Cog6	0.345786	0.000504283	-0.0860803	0.999998	TRUE
Gm26678	0.29985	0.0624607	-0.158395	0.999998	FALSE
B020017C02Rik	0.46566	0.0177631	-0.192431	0.999998	FALSE
Nbea	0.229945	0.0556499	-0.0532042	0.999998	TRUE
Tsc22d2	0.222487	0.0413937	-0.113813	0.999998	TRUE
9330121J05Rik	0.589918	0.0296902	-0.354504	0.999998	FALSE
Arhgef26	0.461571	0.00302279	-0.219223	0.999998	TRUE
Tiparp	0.262725	0.00222919	-0.108825	0.999998	TRUE
Mlf1	0.379047	0.000226917	-0.120319	0.999998	TRUE
Nmd3	0.480972	1.73025e-06	-0.0503984	0.999998	FALSE
Tmem144	0.555418	0.000851811	0.100375	0.999998	FALSE
Map9	0.328104	0.0429375	0.130975	0.999998	TRUE
Rbm46	0.462557	0.00101879	-0.271577	0.999998	TRUE
D930015E06Rik	0.206911	0.0563779	-0.161207	0.999998	TRUE
Fbxw7	0.376511	0.000128259	-0.121138	0.999998	TRUE
Fam160a1	0.842738	0.000258283	-0.344836	0.999998	FALSE
Gm9790	0.29746	0.0284698	-0.0135001	0.999998	FALSE
Lrba	0.472025	1.493e-10	-0.00983195	0.999998	TRUE
Dclk2	0.531525	0.0162514	-0.146915	0.999998	TRUE
Etv3	0.28704	0.00314027	-0.0176263	0.999998	TRUE
Smg5	0.239017	0.00668559	-0.0383693	0.999998	TRUE
Dap3	0.350425	9.27584e-05	-0.0847798	0.999998	TRUE
Hcn3	1.53784	1.94105e-09	0.0659938	0.999998	FALSE
Clk2	0.254893	0.035902	-0.0610046	0.999998	TRUE
Efna3	0.503887	0.0224677	-0.211308	0.999998	FALSE
4731419I09Rik	0.393239	0.0297288	-0.264303	0.999998	FALSE
Adam15	0.400446	0.000701227	-0.24804	0.999998	TRUE
Zbtb7b	0.373851	0.000370579	0.0349094	0.999998	TRUE
Gm15417	0.670213	0.0811829	0.210388	0.999998	FALSE
Chrnb2	0.246399	0.0997564	0.00799201	0.999998	FALSE
Il6ra	0.597662	7.96282e-05	-0.264739	0.999998	TRUE
Atp8b2	0.166633	0.0637917	0.0528277	0.999998	TRUE
Crtc2	0.218206	0.0575587	0.0372785	0.999998	TRUE
Ints3	0.232332	0.0176517	-0.00420946	0.999998	TRUE
Npr1	0.44306	0.000101205	0.0112665	0.999998	TRUE
Gm16048	0.469319	0.000472281	0.0389625	0.999998	FALSE
Mif-ps3	0.346098	0.0256255	-0.0890057	0.999998	FALSE
Gm9774	0.166479	0.0759565	-0.00601902	0.999998	FALSE
Rorc	0.668494	1.04935e-07	0.0356531	0.999998	FALSE
Tdrkh	0.526894	4.86503e-05	-0.351289	0.999998	TRUE
Snx27	0.200597	0.0559841	-0.0917871	0.999998	TRUE
Tuft1	0.435328	0.000135323	-0.166602	0.999998	TRUE
BC021767	0.495961	5.02453e-06	-0.041087	0.999998	TRUE
Cgn	0.489943	1.84806e-07	-0.0331142	0.999998	TRUE
Pi4kb	0.216245	0.0127533	-0.00859006	0.999998	TRUE
A730011C13Rik	0.318353	0.0927876	0.0194057	0.999998	FALSE
Pip5k1a	0.335347	3.35066e-05	-0.0363046	0.999998	TRUE
Mllt11	0.403671	0.00398605	0.080058	0.999998	TRUE
Cdc42se1	0.35193	4.02759e-05	0.0411009	0.999998	TRUE
Anxa9	0.840055	0.00358482	0.0947887	0.999998	FALSE
Setdb1	0.246557	0.00773797	-0.0219288	0.999998	TRUE
Hormad1	1.66148	1.12031e-26	-0.585313	0.205536	FALSE
Ensa	0.162143	0.0842812	-0.00822663	0.999998	TRUE
Ciart	0.407852	0.0737365	-0.442461	0.999998	TRUE
Car14	0.701294	0.000612799	0.0662645	0.999998	FALSE
Plekho1	0.686349	6.16592e-10	-0.0140683	0.999998	TRUE
Hist2h2ac	1.06087	0.0208538	-0.304032	0.999998	FALSE
Hist2h3c2	1.34341	0.00260628	-0.45143	0.999998	FALSE
Gm20632	1.16195	3.06012e-12	-0.0747795	0.999998	FALSE
Hist2h2aa2	1.18713	7.3182e-09	-0.20811	0.999998	FALSE
AC125099.2	1.0937	0.000130062	-0.140424	0.999998	FALSE
Gm20633	1.26373	1.19685e-13	-0.0217749	0.999998	FALSE
Hist2h2aa1	1.18313	8.54674e-09	-0.203834	0.999998	FALSE
Gm20634	1.39547	1.28378e-19	-0.210869	0.999998	FALSE
AC125099.1	1.0937	0.000130062	-0.140424	0.999998	FALSE
Hist2h3c1	1.55509	3.98347e-12	-0.370134	0.999998	FALSE
Nudt17	1.95251	1.9048e-12	-0.240257	0.999998	FALSE
Rnf115	0.243681	0.0158189	-0.11807	0.999998	TRUE
Chd1l	0.258051	0.0133688	-0.115568	0.999998	TRUE
Gm43076	1.52309	7.48887e-05	0.449439	0.999998	FALSE
Sec22b	0.184512	0.0465243	-0.00411256	0.999998	TRUE
Hmgcs2	0.289743	0.0084082	0.214883	0.999998	TRUE
Gdap2	0.269068	0.0265949	-0.170086	0.999998	TRUE
Sycp1	1.18525	3.50219e-23	-0.478858	0.999998	TRUE
Dennd2c	0.411864	0.00201047	-0.246548	0.999998	TRUE
Ap4b1	0.2535	0.0431493	-0.0334816	0.999998	TRUE
Gm43064	0.23881	0.0779353	-0.0359508	0.999998	FALSE
Phtf1	0.237226	0.0183336	-0.0457645	0.999998	TRUE
Magi3	0.282849	0.0242587	-0.120207	0.999998	TRUE
Lrig2	0.29534	0.00212004	-0.030666	0.999998	TRUE
Slc16a1	0.369899	4.53166e-06	-0.0875734	0.999998	TRUE
Gm42659	2.17367	0.0272573	1.58535	0.999998	FALSE
Kcnd3	0.391395	0.00289629	0.00701191	0.999998	TRUE
Atp5f1	0.233594	0.00601834	-0.114662	0.999998	FALSE
AI504432	0.793996	1.77391e-05	-0.0184317	0.999998	FALSE
Slc16a4	0.78507	8.11911e-06	-0.00715338	0.999998	FALSE
Sort1	0.207641	0.0131718	0.0262893	0.999998	TRUE
5330417C22Rik	0.496084	0.0818057	-0.0893489	0.999998	FALSE
Wdr47	0.717578	8.04938e-10	-0.0391363	0.999998	TRUE
Henmt1	0.335403	0.0451198	-0.338201	0.999998	TRUE
Rtca	0.218339	0.0486128	-0.0236797	0.999998	TRUE
Gm26530	0.272442	0.0305283	7.96697e-05	0.999998	FALSE
Ptbp2	0.379597	5.91875e-05	-0.166751	0.999998	TRUE
Tmem56	0.990469	2.22141e-06	-0.574824	0.999998	FALSE
Arhgap29	0.330715	6.75256e-05	-0.0341986	0.999998	TRUE
Abca4	1.0965	0.00523104	0.532902	0.999998	FALSE
Usp53	0.20023	0.0512497	0.0213698	0.999998	TRUE
Myoz2	0.819967	0.00191693	-0.0261519	0.999998	FALSE
Prss12	0.663362	1.46994e-05	0.0172663	0.999998	TRUE
Ugt8a	2.0182	1.03698e-37	-0.790649	0.0194936	FALSE
Gm20568	0.195402	0.0835685	-0.183429	0.999998	FALSE
Alpk1	0.45216	0.0459226	0.101327	0.999998	TRUE
Tifa	0.429993	0.00182755	0.0260104	0.999998	TRUE
5730508B09Rik	0.607356	0.000846143	-0.065965	0.999998	TRUE
Gar1	0.21931	0.0849376	-0.0450948	0.999998	TRUE
Lef1	0.436282	0.0954133	-0.189012	0.999998	FALSE
Npnt	1.36998	6.88205e-21	-0.117916	0.999998	TRUE
Ppa2	0.210358	0.053794	0.0615309	0.999998	FALSE
Lamtor3	0.277293	0.014733	0.0720887	0.999998	TRUE
Dapp1	0.331296	0.0211501	0.0887927	0.999998	TRUE
Tspan5	0.168221	0.093952	0.0801896	0.999998	TRUE
Pdlim5	0.614636	1.12245e-10	-0.0329816	0.999998	TRUE
Kyat3	0.426863	0.00246404	0.138512	0.999998	FALSE
Clca1	1.74302	0.0460213	0.228	0.999998	TRUE
Odf2l	0.298872	0.046265	0.0172678	0.999998	FALSE
Lpar3	2.2075	2.05131e-10	-0.204072	0.999998	TRUE
Ssx2ip	0.446601	2.63162e-06	-0.0456359	0.999998	TRUE
Spata1	0.641502	0.000107202	-0.0244195	0.999998	FALSE
Gng5	0.181205	0.0553305	-0.0405596	0.999998	TRUE
Msh4	1.40167	2.24175e-05	-0.772934	0.999998	FALSE
Lhx8	0.721188	0.0286229	-0.824678	0.999998	FALSE
Lrriq3	0.710022	0.0169098	0.0552476	0.999998	FALSE
Gm5983	0.343332	0.0218752	-0.101028	0.999998	FALSE
Cth	0.473198	0.0955249	0.154355	0.999998	FALSE
Ankrd13c	0.171385	0.0775236	-0.0835495	0.999998	TRUE
Trp53inp1	0.327615	9.24653e-05	-0.0612353	0.999998	TRUE
Ccne2	0.875632	2.17711e-17	-0.303715	0.747122	TRUE
Ints8	0.347644	0.000163518	-0.133214	0.999998	TRUE
Gm26663	1.12887	0.0189385	-0.721381	0.999998	FALSE
Osgin2	0.348207	0.00296153	-0.0296712	0.999998	TRUE
Ripk2	0.328208	0.00721212	-0.1369	0.999998	TRUE
Coq3	0.275288	0.0409482	-0.0326291	0.999998	TRUE
Mms22l	0.207692	0.0663693	-0.0877992	0.999998	TRUE
Mdn1	0.373509	9.68707e-05	-0.173541	0.999998	TRUE
Rngtt	0.222054	0.0550257	-0.00416613	0.999998	TRUE
Rars2	0.209705	0.07404	-0.0110604	0.999998	TRUE
3110043O21Rik	0.195946	0.0469727	-0.0121421	0.999998	TRUE
Lingo2	0.608317	0.0120204	0.0338399	0.999998	TRUE
Nfx1	0.166184	0.0556499	0.0515729	0.999998	TRUE
Nol6	0.189929	0.0994336	-0.0823623	0.999998	TRUE
Kif24	0.312681	0.0272848	-0.0648412	0.999998	TRUE
Enho	0.497518	0.0167514	-0.18026	0.999998	FALSE
Cntfr	0.672822	0.000141001	-0.369871	0.999998	TRUE
Fam214b	0.316917	0.0166278	0.153081	0.999998	TRUE
Creb3	0.343217	0.000114815	0.0285785	0.999998	TRUE
Fam221b	0.202507	0.0858456	-0.083795	0.999998	FALSE
Gm12481	0.197636	0.0934916	-0.082582	0.999998	FALSE
Tmem8b	0.251066	0.0315695	0.0863894	0.999998	TRUE
5430416O09Rik	0.795796	0.00831472	-0.127124	0.999998	FALSE
Frmpd1	0.60729	0.00400987	-0.213321	0.999998	TRUE
Tdrd7	0.361912	0.000638393	-0.0429531	0.999998	TRUE
Gm16731	0.989484	0.000531239	-0.162339	0.999998	FALSE
Coro2a	1.28695	2.74745e-23	-0.0457338	0.999998	TRUE
Tbc1d2	0.427104	0.0861634	-0.103117	0.999998	FALSE
Galnt12	0.445668	0.00172506	-0.28603	0.999998	TRUE
Tgfbr1	0.33958	5.14957e-05	-0.0554675	0.999998	TRUE
Tmem38b	0.310031	0.0126672	-0.0241783	0.999998	TRUE
Gm12538	0.364151	0.0113178	-0.0528952	0.999998	FALSE
AI481877	2.21222	5.62566e-45	-0.512524	0.999998	FALSE
Hsdl2	0.17919	0.0796047	-0.0281767	0.999998	TRUE
E130308A19Rik	0.361469	0.000195152	-0.0440758	0.999998	TRUE
Fkbp15	0.275842	0.00337533	0.0355393	0.999998	TRUE
Rasef	0.805033	0.020562	-0.639084	0.999998	FALSE
Gm11405	0.270107	0.061984	-0.0100408	0.999998	FALSE
Kdm4c	0.25565	0.0218468	0.0671824	0.999998	TRUE
Gm11407	0.198724	0.059303	0.0115695	0.999998	FALSE
Ttc39b	0.629341	2.33226e-05	-0.240437	0.999998	TRUE
Ccdc171	0.32942	0.0663229	-0.176846	0.999998	TRUE
Sh3gl2	0.247697	0.00642401	0.111679	0.999998	TRUE
Acer2	0.416666	0.0292458	-0.0522334	0.999998	FALSE
Focad	0.455805	3.82537e-06	-0.0649656	0.999998	TRUE
Cdkn2a	0.532758	0.00292608	-0.398264	0.999998	FALSE
Cdkn2b	1.46229	6.64357e-10	0.0530391	0.999998	FALSE
Dmrta1	0.69535	4.61798e-15	0.00474154	0.999998	TRUE
Elavl2	0.78814	2.57875e-10	-0.253104	0.999998	FALSE
Ak4	0.219642	0.0583381	-0.157322	0.999998	TRUE
Pde4b	0.462082	0.00743745	0.178752	0.999998	TRUE
Slc35d1	0.344211	0.0145953	0.0391078	0.999998	TRUE
Dab1	0.382198	0.080929	-0.177868	0.999998	TRUE
1700024P16Rik	3.08981	5.5241e-28	-0.0419343	0.999998	TRUE
Gm12727	0.349354	0.000615472	-0.0500033	0.999998	FALSE
Usp24	0.267867	0.00586375	-0.10796	0.999998	TRUE
Cyb5rl	0.461925	0.00153332	0.0691061	0.999998	TRUE
Lrrc42	0.333954	0.00184402	-0.0971394	0.999998	TRUE
Glis1	0.686235	0.000168382	-0.387645	0.999998	FALSE
Dmrtb1	1.01542	0.0101279	-0.649213	0.999998	TRUE
Lrp8	1.5538	2.35549e-28	-0.0877147	0.999998	TRUE
Zyg11a	0.291231	0.0711163	0.0700958	0.999998	TRUE
Zcchc11	0.304302	0.0010741	-0.070656	0.999998	TRUE
Orc1	0.36937	0.00466697	-0.338758	0.999998	TRUE
Eps15	0.369487	8.2814e-06	0.0337841	0.999998	TRUE
Faf1	0.256775	0.0129995	-0.0781828	0.999998	TRUE
Elavl4	0.941747	0.0150774	0.177297	0.999998	FALSE
Kncn	1.52289	0.00960399	0.0103783	0.999998	FALSE
Dmbx1	1.05295	0.000414496	-0.445629	0.999998	FALSE
Faah	0.432805	0.00235301	-0.12942	0.999998	FALSE
Lrrc41	0.187115	0.0304696	0.0214496	0.999998	TRUE
Lurap1	0.275252	0.0745308	0.0311566	0.999998	FALSE
RP23-276M23.6	0.714516	1.78296e-06	-0.209225	0.999998	FALSE
Pik3r3	0.747419	4.83902e-09	-0.201708	0.999998	TRUE
Mast2	0.261275	0.00215539	-0.00557097	0.999998	TRUE
Ipp	0.305355	0.00509855	0.0919708	0.999998	TRUE
Gpbp1l1	0.457515	1.35364e-09	-0.096408	0.999998	TRUE
C530005A16Rik	0.468405	0.000234614	-0.0298926	0.999998	FALSE
Tesk2	0.22391	0.038399	-0.0931973	0.999998	TRUE
Hpdl	0.597098	0.0079291	0.266495	0.999998	TRUE
Zswim5	0.518736	0.000120831	-0.386907	0.999998	TRUE
Hectd3	0.686747	1.39144e-10	-0.0356226	0.999998	TRUE
1700021J08Rik	0.691794	0.00745219	0.0514788	0.999998	FALSE
Eif2b3	0.395701	2.79032e-05	-0.101132	0.999998	TRUE
Gm12841	0.260642	0.089592	0.0735859	0.999998	FALSE
Atp6v0b	0.251891	0.0357883	0.0541264	0.999998	TRUE
Ipo13	0.229252	0.0655516	-0.0979474	0.999998	TRUE
Szt2	0.258417	0.0336358	0.162668	0.999998	TRUE
Foxj3	0.177536	0.0844322	-0.0169138	0.999998	TRUE
Cited4	1.02879	0.000435147	-0.024904	0.999998	TRUE
Rims3	0.445581	0.00106614	-0.23015	0.999998	FALSE
Smap2	0.428106	1.57453e-05	-0.0795619	0.999998	TRUE
9530002B09Rik	1.029	0.0937367	-0.113301	0.999998	FALSE
Ppt1	0.402386	6.63619e-05	0.114843	0.999998	TRUE
Mfsd2a	0.460327	5.06755e-05	0.18027	0.999998	TRUE
Akirin1	0.370462	2.60952e-06	-0.00474003	0.999998	TRUE
Mycbp	0.295561	0.0161374	-0.0917874	0.999998	TRUE
Gm12905	0.625513	0.0412188	-0.206989	0.999998	FALSE
Rragc	0.203489	0.0214679	0.0523437	0.999998	TRUE
Inpp5b	0.787929	7.78936e-16	-0.0223299	0.999998	TRUE
Yrdc	0.389772	0.00361735	-0.104506	0.999998	TRUE
Grik3	0.604591	0.00138087	-0.270308	0.999998	TRUE
Ago3	0.502203	1.69881e-06	-0.0329351	0.999998	TRUE
Ago4	1.12521	4.17352e-16	-0.273155	0.999998	TRUE
Tfap2e	1.59065	0.0233098	-0.236598	0.999998	FALSE
AU040320	0.325628	0.00127633	0.0205218	0.999998	TRUE
Zmym6	0.271495	0.0402018	0.027947	0.999998	TRUE
Rnf19b	0.614404	6.09062e-13	-0.119137	0.999998	TRUE
Fndc5	0.54778	1.3711e-05	0.0468238	0.999998	TRUE
S100pbp	0.36326	2.17415e-05	0.0109197	0.999998	FALSE
Marcksl1	0.314494	0.00262353	-0.0937317	0.999998	TRUE
Snrnp40	0.184659	0.0495274	-0.0941781	0.999998	TRUE
Ptpru	0.889493	0.000641295	-0.22175	0.999998	FALSE
A930004J17Rik	0.655618	0.0960485	0.374807	0.999998	FALSE
Taf12	0.213644	0.0773494	-0.118532	0.999998	TRUE
Trnau1ap	0.262754	0.068732	0.0527742	0.999998	TRUE
Sesn2	0.954669	2.42448e-18	-0.0140313	0.999998	TRUE
Stx12	0.166038	0.0682205	0.0714305	0.999998	TRUE
Gpatch3	0.391599	0.00665582	-0.0647495	0.999998	TRUE
Gpn2	0.269031	0.0641429	-0.0885327	0.999998	TRUE
Zdhhc18	0.276304	0.0264299	-0.138499	0.999998	TRUE
Lin28a	0.261485	0.0795201	-0.160402	0.999998	TRUE
Cd52	1.57068	2.48324e-09	0.357281	0.999998	TRUE
Cep85	0.393673	8.82587e-05	-0.192985	0.999998	TRUE
Slc30a2	0.335058	0.000654922	0.0564591	0.999998	TRUE
Pafah2	0.444487	0.000909089	-0.0652385	0.999998	TRUE
Paqr7	0.666004	3.50606e-11	0.084802	0.999998	TRUE
Mtfr1l	0.267178	0.0033476	0.019274	0.999998	TRUE
Tmem57	0.229325	0.0190508	-0.11429	0.999998	TRUE
Rhd	1.05277	5.003e-05	-0.236434	0.999998	FALSE
Rsrp1	0.327755	0.00633449	0.0591609	0.999998	TRUE
Runx3	0.927749	9.49158e-08	-0.531416	0.999998	TRUE
Ncmap	0.643554	0.000197164	0.0312191	0.999998	TRUE
Fuca1	0.188151	0.0657869	0.0733535	0.999998	TRUE
Hmgcl	0.225887	0.0629851	0.0984768	0.999998	TRUE
Gale	0.40335	0.0194042	-0.0814403	0.999998	TRUE
Pithd1	0.25654	0.0220962	-0.0113386	0.999998	TRUE
Tceb3	0.276764	0.00317133	0.0318148	0.999998	TRUE
E2f2	0.627418	6.1837e-07	-0.135498	0.999998	TRUE
Luzp1	0.215723	0.0988705	-0.0629948	0.999998	TRUE
Epha8	1.14953	0.00471923	-0.331069	0.999998	TRUE
Rap1gapos	0.84355	0.0858535	0.0355397	0.999998	FALSE
Kif17	0.582672	0.00922121	-0.435272	0.999998	FALSE
Minos1	0.264178	0.0224017	-0.0581704	0.999998	TRUE
Emc1	0.237327	0.0273725	0.0432389	0.999998	TRUE
Padi3	0.547676	0.00342321	-0.140875	0.999998	TRUE
Atp13a2	0.512408	4.54985e-09	0.0482954	0.999998	TRUE
Zbtb17	0.270147	0.0183516	-0.107134	0.999998	TRUE
Cela2a	0.407315	0.0634889	0.00580955	0.999998	FALSE
4930455G09Rik	2.03826	0.00853755	-0.29287	0.999998	FALSE
Pramel1	0.326801	0.00625791	-0.236348	0.999998	TRUE
Gm13123	0.281096	0.0890619	0.132215	0.999998	FALSE
Smarca5-ps	0.157903	0.086561	-0.0975268	0.999998	TRUE
Gm13232	0.178818	0.0456967	-0.0981758	0.999998	FALSE
Gm13034	0.163701	0.0766383	-0.105569	0.999998	TRUE
Gm13167	0.179072	0.0453827	-0.097883	0.999998	FALSE
Gm13237	0.153227	0.0879246	-0.0921719	0.999998	FALSE
Gm13140	0.1512	0.0820397	-0.105305	0.999998	FALSE
Gm13135	0.168998	0.0584509	-0.101121	0.999998	FALSE
Gm13136	0.182208	0.0519248	-0.108363	0.999998	FALSE
Mfn2	0.242837	0.034118	-0.0391313	0.999998	TRUE
Clcn6	0.480344	1.04871e-05	-0.00364773	0.999998	TRUE
Agtrap	0.238388	0.00445666	0.072038	0.999998	TRUE
Draxin	1.08899	0.0264609	0.25748	0.999998	FALSE
Mad2l2	0.280578	0.0754071	-0.132958	0.999998	TRUE
Fbxo6	0.459104	0.000126119	0.0288699	0.999998	FALSE
Mtor	0.495954	5.49931e-08	-0.0718999	0.999998	TRUE
Casz1	0.699727	9.24653e-05	-0.124607	0.999998	TRUE
Gm17029	0.263413	0.0263594	0.0498849	0.999998	FALSE
Pex14	0.25329	0.0106359	0.0117832	0.999998	TRUE
Dffa	0.320124	0.0210268	-0.0316366	0.999998	TRUE
Apitd1	0.323461	0.06144	-0.263503	0.999998	TRUE
Clstn1	1.1059	1.78941e-34	-0.0762644	0.999998	TRUE
Slc25a33	0.463284	0.000445111	-0.174191	0.999998	TRUE
Gm13068	0.472813	0.00983483	-0.0969947	0.999998	FALSE
Gm13091	1.06717	0.0982071	0.200824	0.999998	FALSE
Errfi1	0.222259	0.042871	-0.159679	0.999998	TRUE
Camta1	0.222986	0.0666164	-0.0745044	0.999998	TRUE
Klhl21	0.304598	0.00757672	-0.140881	0.999998	TRUE
Zbtb48	0.298166	0.0518121	-0.105792	0.999998	TRUE
Plekhg5	0.279798	0.00514625	0.00389843	0.999998	TRUE
Espn	0.442661	1.62734e-07	-0.0597518	0.999998	TRUE
Gm13077	0.417827	0.0641957	0.0644373	0.999998	FALSE
Acot7	0.411487	0.000651723	-0.181042	0.999998	FALSE
Chd5	1.28316	1.78705e-14	-0.305357	0.999998	TRUE
Kcnab2	0.31493	0.0956825	-0.163302	0.999998	TRUE
Nphp4	0.301108	0.0926855	0.0508427	0.999998	FALSE
Wrap73	0.242926	0.0588138	-0.0229554	0.999998	TRUE
Megf6	0.353455	0.0264362	0.22523	0.999998	TRUE
Prdm16	0.302515	0.0566056	-0.201785	0.999998	TRUE
Plch2	0.653154	0.0572808	-0.189805	0.999998	FALSE
Prkcz	0.388164	0.065252	-0.116614	0.999998	TRUE
Tmem52	0.614711	0.00312775	0.260785	0.999998	FALSE
Cdk11b	0.293856	0.001148	-0.101036	0.999998	TRUE
Ssu72	0.254082	0.0248308	0.0409114	0.999998	TRUE
Ccnl2	0.19837	0.0613199	-0.00822819	0.999998	TRUE
Aurkaip1	0.224683	0.0521786	0.000103916	0.999998	TRUE
Dvl1	0.241024	0.0356039	0.00722864	0.999998	TRUE
Acap3	0.35828	0.0128954	-0.21105	0.999998	TRUE
Pex1	0.29856	0.0369333	-0.161538	0.999998	TRUE
Ankib1	0.257306	0.00177903	-0.00524105	0.999998	TRUE
Krit1	0.217615	0.0448308	-0.0716856	0.999998	TRUE
Steap1	1.13396	3.21028e-07	-0.648574	0.999998	TRUE
Adam22	0.494896	0.0030511	-0.216437	0.999998	TRUE
Rundc3b	0.412573	7.12569e-05	-0.215384	0.999998	TRUE
Tmem243	0.688709	1.6297e-06	-0.309638	0.999998	FALSE
Pclo	1.22862	3.57597e-07	-0.569583	0.999998	FALSE
Gnai1	0.627438	7.31799e-12	-0.0459736	0.999998	TRUE
Phtf2	0.186446	0.0642422	-0.0440508	0.999998	TRUE
Napepld	0.347425	0.00144407	0.0245269	0.999998	TRUE
Reln	0.756443	1.86475e-06	-0.390466	0.999998	TRUE
Gm9523	0.328352	0.000998129	0.0536112	0.999998	FALSE
Srpk2	0.237576	0.00568462	0.0134505	0.999998	TRUE
Rint1	0.223236	0.0749968	-0.0684025	0.999998	TRUE
Kcnh2	0.569913	1.20413e-06	0.067107	0.999998	TRUE
Atg9b	0.783874	0.0338839	-0.453961	0.999998	FALSE
Cdk5	0.393264	3.99506e-05	0.0606242	0.999998	TRUE
Abcf2	0.176564	0.0584743	-0.123798	0.999998	TRUE
Prkag2	0.46104	9.85174e-05	-0.182034	0.999998	TRUE
Kmt2c	0.322391	0.0203845	0.0344149	0.999998	TRUE
Gm42585	0.932084	0.0018208	0.322526	0.999998	FALSE
Rbm33	0.272815	0.00277087	-0.0568134	0.999998	TRUE
Rnf32	0.758334	0.00116504	0.183765	0.999998	FALSE
Lmbr1	0.289926	0.0141273	-0.0826853	0.999998	TRUE
Ube3c	0.18048	0.0696047	-0.0732503	0.999998	TRUE
Gm5552	0.650228	0.0560702	0.356399	0.999998	FALSE
Slc5a6	0.24238	0.0928452	-0.216651	0.999998	TRUE
Nrbp1	0.241364	0.00601834	-0.0516729	0.999998	TRUE
Slc4a1ap	0.199046	0.0602762	-0.0824192	0.999998	TRUE
Plb1	0.755254	0.0397946	0.24494	0.999998	FALSE
Yes1	0.187535	0.0847688	0.0239617	0.999998	TRUE
Pisd	0.295619	0.00441013	-0.0729936	0.999998	TRUE
Gm20671	0.260086	0.0209181	-0.0623611	0.999998	FALSE
Depdc5	0.298882	0.00445927	-0.10736	0.999998	TRUE
Tmem129	0.491029	1.80251e-06	-0.0228753	0.999998	TRUE
G630022F23Rik	1.19781	0.0839983	-0.449884	0.999998	FALSE
Fgfr3	1.10196	2.52908e-09	-0.202542	0.999998	TRUE
Letm1	0.227258	0.0373425	-0.0276081	0.999998	TRUE
Poln	1.54356	5.62761e-09	-0.273559	0.999998	FALSE
Mxd4	0.595869	3.15015e-13	-0.0170267	0.999998	FALSE
Gm42846	0.591079	1.11115e-08	0.0275832	0.999998	FALSE
Rnf4	0.251697	0.00118956	-0.0141285	0.999998	TRUE
Sh3bp2	0.387108	0.00247984	-0.0504962	0.999998	TRUE
Grk4	0.774164	0.00114226	-0.136168	0.999998	TRUE
Htt	0.494336	8.08353e-08	0.013689	0.999998	TRUE
Lrpap1	0.364753	1.06166e-05	0.0304308	0.999998	TRUE
Hmx1	1.09435	0.00333473	-0.543107	0.999998	FALSE
4930442P19Rik	1.45366	0.0741544	-0.263814	0.999998	FALSE
D5Ertd579e	0.178489	0.06853	0.125443	0.999998	TRUE
Bloc1s4	0.344871	0.0207808	-0.0838464	0.999998	TRUE
Man2b2	0.340444	0.00148446	0.0401216	0.999998	TRUE
Jakmip1	0.667881	3.05505e-06	0.082611	0.999998	FALSE
Otop1	1.0902	0.0817178	-0.328211	0.999998	FALSE
Gm5298	0.522693	0.0284537	-0.202776	0.999998	FALSE
Cpeb2	0.918331	3.20804e-14	-0.118127	0.999998	TRUE
Fbxl5	0.199536	0.0178697	0.0165166	0.999998	TRUE
Cd38	0.71452	0.013142	-0.174221	0.999998	FALSE
Prom1	1.15326	1.33459e-05	-0.0615607	0.999998	FALSE
Qdpr	0.202063	0.0626773	-0.0119338	0.999998	TRUE
Gm42413	0.213048	0.0690928	-0.0276874	0.999998	FALSE
5730480H06Rik	0.255684	0.0859839	-0.0615984	0.999998	FALSE
9230114K14Rik	0.701227	0.0330363	-0.115367	0.999998	TRUE
Sod3	0.372672	9.07027e-06	-0.0123975	0.999998	TRUE
Ccdc149	0.519415	0.0205503	-0.099708	0.999998	TRUE
Sepsecs	0.409635	9.29561e-05	-0.0850157	0.999998	TRUE
Pi4k2b	0.379164	0.000626606	-0.043282	0.999998	TRUE
Slc34a2	1.23239	0.036543	1.50559	0.417947	FALSE
Stim2	0.254118	0.0132031	-0.0176606	0.999998	TRUE
Gm43002	0.797869	0.0107686	0.267971	0.999998	FALSE
Arap2	1.20083	1.20199e-29	-0.142345	0.999998	TRUE
Limch1	0.347628	0.0321268	-0.0796984	0.999998	TRUE
Bend4	0.697338	1.3559e-10	-0.243276	0.999998	TRUE
Atp8a1	0.4795	2.61408e-05	0.112609	0.999998	TRUE
Cox7b2	0.317031	0.0637987	-0.160391	0.999998	FALSE
Corin	1.50926	2.97005e-09	-0.137006	0.999998	FALSE
Nfxl1	0.259855	0.00408071	-0.00651943	0.999998	TRUE
Tec	0.450513	0.0416792	0.0861424	0.999998	FALSE
Slain2	0.188781	0.0492525	0.0335144	0.999998	TRUE
Fryl	0.363599	6.81261e-05	0.163103	0.999998	TRUE
Cwh43	4.61112	1.96372e-11	1.65721	0.999998	FALSE
Scfd2	0.367765	0.00251414	-0.0527317	0.999998	FALSE
Kit	0.535973	9.2819e-06	-0.333396	0.97936	TRUE
Clock	0.423602	2.82397e-06	-0.0275136	0.999998	TRUE
Exoc1	0.254034	0.0233192	-0.00531997	0.999998	TRUE
Hopx	2.11097	1.25917e-19	0.129191	0.999998	TRUE
Hopxos	2.06472	1.91181e-05	-0.657202	0.999998	FALSE
Noa1	0.352016	0.0137269	-0.21565	0.999998	TRUE
Polr2b	0.211515	0.0239062	-0.135	0.999998	TRUE
Uba6	0.501991	3.49334e-08	-0.161269	0.999998	TRUE
Rufy3	0.5	1.77091e-06	0.0661815	0.999998	TRUE
Mob1b	0.18688	0.0574309	0.0409991	0.999998	TRUE
Cdkl2	1.00464	3.78243e-11	-0.235251	0.999998	FALSE
Uso1	0.20479	0.0135647	-0.0447861	0.999998	TRUE
U90926	3.60643	0.000192132	0.346175	0.999998	FALSE
Art3	1.1077	4.20248e-20	0.0711275	0.999998	TRUE
Ccdc158	1.0611	6.46724e-07	-0.448932	0.999998	FALSE
Kat2b-ps	0.440021	0.0480541	0.0942427	0.999998	FALSE
Gm5560	0.196973	0.0567754	0.145233	0.999998	FALSE
Naa11	0.775135	0.000215217	-0.3552	0.999998	TRUE
Enoph1	0.287832	0.0194366	0.00184894	0.999998	TRUE
Helq	0.424353	0.00589221	0.0942435	0.999998	TRUE
Cycs-ps2	0.249832	0.0965938	0.105858	0.999998	FALSE
Cds1	0.780339	3.57597e-07	-0.257784	0.999998	TRUE
BC005561	0.506189	0.00434159	-0.0243293	0.999998	TRUE
D930016D06Rik	0.532454	0.00115057	0.196908	0.999998	TRUE
Hfm1	1.87124	7.19417e-31	-0.293695	0.999998	FALSE
Brdt	0.545499	8.14106e-06	-0.248963	0.999998	TRUE
Ephx4	1.08853	0.053794	0.0898561	0.999998	TRUE
Rnf212	0.569723	0.0850212	-0.1908	0.999998	FALSE
Chfr	0.414017	0.00013791	-0.118458	0.999998	TRUE
Gm15787	0.419498	0.0760211	-0.162923	0.999998	FALSE
Pgam5	0.213371	0.0288003	-0.0396749	0.999998	TRUE
Pxmp2	0.440982	0.0150532	-0.165186	0.999998	FALSE
Pole	0.275006	0.00454578	-0.171275	0.999998	TRUE
P2rx2	1.32483	6.13194e-14	0.128091	0.999998	TRUE
Fbrsl1	0.335753	0.000563109	-0.0624718	0.999998	TRUE
Gm26711	0.806811	0.0255419	-0.00907885	0.999998	FALSE
Galnt9	1.21219	0.0743821	-0.47475	0.999998	FALSE
Noc4l	0.265669	0.0140229	-0.131449	0.999998	TRUE
Sgsm1	1.09527	0.000717104	0.199502	0.999998	FALSE
Foxn4	1.64773	4.04094e-07	-0.590233	0.999998	FALSE
1500011B03Rik	0.53136	2.21861e-06	0.111879	0.999998	TRUE
Gm20499	0.429726	0.0215781	0.0577204	0.999998	FALSE
Oasl2	0.537379	3.05831e-05	-0.0293998	0.999998	TRUE
Coq5	0.409222	0.000545467	-0.0647127	0.999998	TRUE
Gm42903	1.67887	0.0666891	1.04669	0.999998	FALSE
Msi1	0.334631	8.82587e-05	-0.0711835	0.999998	TRUE
Pxn	0.421992	8.22781e-08	-0.0560077	0.999998	TRUE
Ccdc64	0.611514	2.83721e-06	-0.294414	0.999998	FALSE
Taok3	0.416587	0.000661953	0.023829	0.999998	TRUE
Vsig10	0.286589	0.000730099	0.0417633	0.999998	TRUE
Nos1	0.343804	0.0698414	0.112206	0.999998	FALSE
Fbxo21	0.547426	1.52733e-09	-0.029887	0.999998	TRUE
Hrk	0.636441	4.26095e-07	-0.18336	0.999998	TRUE
Tbx3	0.356144	0.0814201	0.119231	0.999998	TRUE
Plbd2	0.253432	0.00301828	0.0213934	0.999998	TRUE
Ddx54	0.21946	0.037946	-0.0128161	0.999998	TRUE
Dtx1	0.332645	8.9447e-05	0.10253	0.999998	TRUE
Tmem116	0.386795	0.0566821	-0.0969536	0.999998	FALSE
Brap	0.449717	4.73037e-06	-0.103522	0.999998	TRUE
Atxn2	0.379687	3.24236e-05	0.0696274	0.999998	TRUE
Pptc7	0.287282	0.00730775	-0.0346857	0.999998	TRUE
Rad9b	0.384144	0.0034707	-0.0215581	0.999998	TRUE
Vps29	0.219462	0.0370451	-0.0819086	0.999998	TRUE
Fam216a	0.197943	0.0964991	-0.106981	0.999998	TRUE
Rnf34	0.191161	0.0290505	0.0103843	0.999998	TRUE
Gm15751	0.261707	0.0621146	-0.0738727	0.999998	FALSE
Diablo	0.285032	0.00150175	-0.0814029	0.999998	TRUE
B3gnt4	0.473066	0.099873	-0.0556247	0.999998	FALSE
Ccdc62	0.689585	0.0330892	0.306225	0.999998	TRUE
Abcb9	0.812866	0.000631458	-0.391078	0.999998	FALSE
Mphosph9	0.310088	0.00151567	0.0258996	0.999998	TRUE
Sbno1	0.396282	4.08162e-05	-0.143511	0.999998	TRUE
Gm37415	0.683726	0.0868817	-0.228767	0.999998	FALSE
Ddx55	0.375302	0.00337517	-0.038206	0.999998	TRUE
Tctn2	0.25164	0.0340482	-0.0225446	0.999998	TRUE
Dnah10	1.17238	0.0360149	0.071591	0.999998	FALSE
Ccdc92	0.62282	0.000103729	-0.327955	0.999998	TRUE
Scarb1	0.343876	0.00149543	0.0264188	0.999998	TRUE
Ubc	0.193399	0.054743	-0.0619989	0.999998	FALSE
Dhx37	0.237244	0.0497243	0.0698601	0.999998	TRUE
Gm7774	0.406476	0.0472237	-0.0959269	0.999998	FALSE
Sept14	2.85832	5.04505e-05	-0.0499952	0.999998	TRUE
Mrps17	0.264864	0.0136898	0.00262009	0.999998	TRUE
Chchd2	0.271096	0.0363237	-0.00350911	0.999998	TRUE
Rabgef1	0.212216	0.0601968	-0.0348321	0.999998	TRUE
Auts2	0.2233	0.041249	-0.0797693	0.999998	TRUE
Gatsl2	0.29922	0.00719639	-0.0812458	0.999998	TRUE
Gm43481	1.40635	0.00783494	1.0495	0.999998	FALSE
Eln	0.319822	0.00173177	-0.0263017	0.999998	TRUE
Cldn4	1.15655	0.071477	0.322934	0.999998	FALSE
Gm43372	0.556314	0.0268148	0.0732742	0.999998	FALSE
Mlxipl	0.406914	0.00583372	0.00789884	0.999998	TRUE
Tbl2	0.250687	0.0138771	-0.0321683	0.999998	TRUE
Fzd9	0.609243	0.00313878	-0.0870815	0.999998	FALSE
Fkbp6	0.511358	1.18061e-06	-0.251189	0.999998	TRUE
Nsun5	0.211072	0.0736485	-0.129215	0.999998	TRUE
Por	0.341112	0.00277203	-0.0823272	0.999998	TRUE
Tmem120a	0.271502	0.0908845	-0.0848277	0.999998	TRUE
Zp3	1.05458	0.0156198	-0.608942	0.999998	FALSE
Dtx2	0.267606	0.0288703	-0.161973	0.999998	TRUE
Polr2j	0.223521	0.0605172	-0.048968	0.999998	TRUE
Slc12a9	0.422125	0.00181777	-0.0442639	0.999998	TRUE
Gigyf1	0.329999	0.0018689	-0.103447	0.999998	TRUE
Tfr2	1.38188	2.84321e-06	-0.313898	0.999998	FALSE
Mospd3	0.284809	0.0272917	-0.24473	0.999998	TRUE
Lrch4	0.470834	3.03855e-05	-0.0912844	0.999998	TRUE
Gm20605	0.509011	2.61754e-06	-0.0942501	0.999998	TRUE
Sap25	0.72746	0.000948334	-0.150715	0.999998	TRUE
Agfg2	0.591257	3.07108e-08	0.0293334	0.999998	FALSE
Zcwpw1	0.874412	1.03101e-12	-0.377066	0.999998	TRUE
Pilra	0.909379	9.21019e-10	-0.301138	0.999998	FALSE
Gjc3	1.63535	0.00318579	-0.446777	0.999998	TRUE
Ap4m1	0.226567	0.0184164	-0.00264791	0.999998	TRUE
Taf6	0.265408	0.00380651	-0.0739453	0.999998	TRUE
BC037034	0.664759	1.89949e-05	-0.181162	0.999998	TRUE
Gm43720	0.495199	0.00178073	-0.0716631	0.999998	FALSE
Gpc2	0.753379	9.49045e-06	-0.166688	0.999998	TRUE
Stag3	0.974636	2.21644e-19	-0.469848	0.999998	TRUE
Dnaaf5	0.28012	0.0187866	-0.0988459	0.999998	FALSE
Get4	0.182125	0.0962496	-0.0399189	0.999998	TRUE
Gpr146	0.57928	0.000106616	0.129034	0.999998	TRUE
Micall2	0.552469	9.9579e-05	-0.0786472	0.999998	TRUE
Ints1	0.323798	0.00116788	-0.140194	0.999998	TRUE
Tmem184a	0.183387	0.0265238	0.084364	0.999998	TRUE
Gm26938	0.225203	0.0224015	0.0531627	0.999998	FALSE
Snx8	0.24772	0.0194707	-0.114815	0.999998	TRUE
Brat1	0.254289	0.0166874	0.0506309	0.999998	TRUE
Sdk1	1.45665	7.21433e-15	-0.0256336	0.999998	FALSE
Ap5z1	0.387305	0.0173311	0.0546347	0.999998	TRUE
Radil	0.547781	0.000160989	-0.230822	0.999998	TRUE
Wipi2	0.157688	0.0974465	-0.0460587	0.999998	TRUE
Rnf216	0.283809	0.00287859	-0.1299	0.999998	TRUE
Zdhhc4	0.20868	0.084787	-0.00611968	0.999998	TRUE
Cyth3	0.220687	0.015746	0.00716972	0.999998	TRUE
Usp42	0.215757	0.0573287	-0.0370433	0.999998	TRUE
Pms2	0.222112	0.0559204	-0.0538869	0.999998	TRUE
Gm42421	0.434227	0.090709	0.0146964	0.999998	FALSE
Rsph10b	1.91572	0.000908272	-0.0313489	0.999998	FALSE
Bri3	0.252236	0.0646897	0.0308835	0.999998	FALSE
Baiap2l1	0.608222	0.00141721	-0.165106	0.999998	TRUE
Nptx2	0.902938	1.22709e-12	-0.368079	0.97936	TRUE
Trrap	0.272402	0.00973815	0.0532308	0.999998	TRUE
Arpc1a	0.221407	0.0289524	-0.0959654	0.999998	TRUE
Arpc1b	0.399759	4.67459e-06	-0.0360109	0.999998	TRUE
Wasf3	0.419666	0.00102763	-0.293301	0.999998	TRUE
Usp12	0.261088	0.00801453	-0.0223848	0.999998	TRUE
Gm6054	0.405266	0.000153058	-0.0330324	0.999998	FALSE
Uspl1	0.229021	0.0254668	-0.00612214	0.999998	TRUE
Fry	0.426673	0.000553518	0.0284733	0.999998	TRUE
Brca2	0.348895	0.00145794	-0.0508288	0.999998	TRUE
Vps50	0.231795	0.0213087	-0.0453577	0.999998	FALSE
Dync1i1	0.346312	0.00567325	0.072612	0.999998	TRUE
Col28a1	1.54381	0.0312029	0.0815139	0.999998	FALSE
Gm45062	0.362462	7.95417e-05	0.0245809	0.999998	FALSE
Glcci1	0.360876	0.000124928	0.0309377	0.999998	TRUE
Gm15529	1.69814	4.21231e-21	-0.542246	0.999998	FALSE
Cftr	0.635112	0.0295954	0.318835	0.999998	FALSE
Cttnbp2	0.651846	0.014093	-0.0585992	0.999998	TRUE
Gm26809	0.490103	0.00126068	0.127161	0.999998	FALSE
Cadps2	0.618095	0.00199409	-0.454425	0.999998	TRUE
6530409C15Rik	0.686113	0.0801662	-0.19924	0.999998	FALSE
Zfp800	0.443941	2.36594e-05	-0.0212895	0.999998	TRUE
Ccdc136	0.279349	0.0636304	-0.196321	0.999998	TRUE
Atp6v1f	0.224607	0.095056	0.00137549	0.999998	FALSE
Tspan33	1.00054	1.0486e-11	-0.381893	0.999998	TRUE
Ahcyl2	0.311455	0.00193555	-0.000976502	0.999998	TRUE
Strip2	0.483492	8.64991e-08	0.0466437	0.999998	TRUE
Copg2	0.197116	0.0170414	0.00848677	0.999998	TRUE
Akr1b3	0.357579	0.000887957	-0.00977305	0.999998	TRUE
Wdr91	0.22656	0.0707658	-0.114635	0.999998	TRUE
Stra8	1.13359	3.19145e-22	-0.478396	0.999998	TRUE
Slc13a4	0.966645	0.0113109	0.289932	0.999998	FALSE
Dgki	0.442472	0.0839957	-0.137392	0.999998	TRUE
Klrg2	0.635757	0.0206153	-0.464686	0.999998	FALSE
Clec2l	0.529759	0.0209988	-0.0628947	0.999998	FALSE
Parp12	0.502434	1.28798e-06	-0.139883	0.999998	TRUE
4930599N23Rik	0.351443	0.003909	0.0651936	0.999998	FALSE
Kdm7a	0.347709	1.10763e-05	0.0447691	0.999998	TRUE
Mkrn1	0.240044	0.0114959	0.0446614	0.999998	TRUE
Braf	0.306854	0.00721125	-0.000247765	0.999998	TRUE
Tmem178b	0.719036	0.00123419	-0.0301333	0.999998	FALSE
Rbpsuh-rs3	0.192188	0.0566539	0.00331021	0.999998	FALSE
Pdia4	0.212196	0.0231489	-0.0445258	0.999998	TRUE
Zfp786	0.710947	0.000443066	-0.0640626	0.999998	FALSE
Gm44696	1.42454	0.0974103	0.241198	0.999998	FALSE
Gm43980	0.83651	0.0846751	0.331833	0.999998	FALSE
Stk31	0.393378	0.00125566	-0.253956	0.999998	TRUE
Snx10	0.270769	0.0153736	-0.117574	0.999998	TRUE
Skap2	0.419322	0.000229526	-0.113256	0.999998	TRUE
Hoxa1	1.20292	0.061331	-0.238305	0.999998	FALSE
Wipf3	0.436646	9.44635e-06	0.0585537	0.999998	TRUE
Plekha8	0.245379	0.00547548	-0.0555997	0.999998	TRUE
Ggct	0.351698	0.0223366	-0.162282	0.999998	FALSE
Avl9	0.312196	0.000167496	0.0202369	0.999998	TRUE
Nt5c3	0.254366	0.00534093	0.0303086	0.999998	TRUE
Herc3	0.27377	0.0187394	-0.216963	0.999998	TRUE
Mageb16-ps2	1.09912	2.53147e-13	-0.0249735	0.999998	FALSE
Gm44059	1.96594	0.0303196	0.0910896	0.999998	FALSE
Gadd45a	0.876937	2.13226e-11	-0.134147	0.999998	TRUE
E230016M11Rik	0.818064	9.58713e-05	-0.196559	0.999998	FALSE
Gm44321	1.52254	0.0364124	0.560382	0.999998	FALSE
Gm44769	1.62968	0.00860816	0.326931	0.999998	FALSE
Mat2a	0.433259	1.14056e-09	0.0314609	0.999998	TRUE
Particl	0.396259	0.00577612	-0.0201764	0.999998	FALSE
Tgoln1	0.149808	0.0926672	-0.0477489	0.999998	TRUE
Suclg1	0.457189	9.691e-05	0.10711	0.999998	TRUE
Gm44126	0.292579	0.0139666	0.0623678	0.999998	FALSE
Sema4f	0.87223	7.58505e-09	-0.240911	0.999998	TRUE
M1ap	1.22432	2.90248e-18	-0.542516	0.0728253	TRUE
Aup1	0.232141	0.0383912	0.00899753	0.999998	TRUE
Slc4a5	0.570552	0.00165916	0.013888	0.999998	TRUE
Mthfd2	0.344158	0.00149464	-0.117415	0.999998	TRUE
Actg2	0.3853	0.0667336	0.14281	0.999998	TRUE
Vax2	1.24507	0.0678058	-0.252883	0.999998	FALSE
Nagk	0.238776	0.080929	0.0355939	0.999998	TRUE
Paip2b	0.219466	0.00737262	-0.0560266	0.999998	TRUE
Alms1	0.378513	0.000759448	-0.086003	0.999998	TRUE
Alms1-ps1	0.414962	0.00844274	-0.0498817	0.999998	FALSE
Alms1-ps2	0.369688	0.01186	-0.054371	0.999998	FALSE
Mxd1	0.358634	0.00017982	0.0715439	0.999998	TRUE
Gmcl1	0.291123	0.0220806	-0.0969575	0.999998	TRUE
Rab43	0.218855	0.067018	-0.0167697	0.999998	TRUE
Gm44423	1.77051	0.089592	0.479786	0.999998	FALSE
Gata2	0.533522	0.00358339	-0.0708397	0.999998	TRUE
Eefsec	0.277397	0.0124529	-0.0745713	0.999998	TRUE
Sec61a1	0.261491	0.00148146	-0.0137979	0.999998	TRUE
Gm44170	0.27368	0.0021051	-0.00601202	0.999998	FALSE
Gm26588	0.945461	0.0428837	0.0687832	0.999998	FALSE
Mgll	0.39782	0.00298751	-0.198172	0.999998	TRUE
4933427D06Rik	0.66523	7.94513e-08	-0.446114	0.602468	TRUE
Chchd6	0.706857	4.77156e-07	-0.169549	0.999998	TRUE
Txnrd3	0.353742	0.00427809	-0.115094	0.999998	TRUE
Zxdc	0.243229	0.0355118	-0.0253662	0.999998	TRUE
Ppp1r2-ps2	0.263867	0.0147221	-0.0139545	0.999998	FALSE
Nup210	0.66074	6.11975e-11	-0.1323	0.999998	TRUE
Lsm3	0.250303	0.0233953	-0.0980251	0.999998	TRUE
Gm45216	0.230764	0.0774196	-0.0981902	0.999998	FALSE
Magi1	0.369034	0.00195883	-0.0689745	0.999998	TRUE
Kbtbd8	0.249	0.0945037	-0.18999	0.999998	TRUE
Tmf1	0.349111	0.00718783	-0.0663438	0.999998	TRUE
Mitf	0.80719	3.26433e-05	-0.201494	0.999998	TRUE
Prok2	1.66656	0.00117724	-0.265155	0.999998	FALSE
Shq1	0.330532	0.0140756	-0.187786	0.999998	TRUE
Cntn3	0.989545	1.05657e-05	-0.592521	0.999998	FALSE
Arl8b	0.166397	0.0568824	0.0178928	0.999998	TRUE
Brpf1	0.285482	0.00186266	0.00780363	0.999998	TRUE
Gm15492	0.458035	0.0803806	0.0777945	0.999998	FALSE
Cidec	4.06514	1.45688e-05	1.19869	0.999998	FALSE
Il17re	1.51258	7.37325e-08	0.173263	0.999998	FALSE
Fancd2	0.424274	2.59736e-05	-0.214646	0.999998	TRUE
Tatdn2	0.334562	0.000134363	-0.142263	0.999998	TRUE
Hrh1	0.552535	0.0329066	-0.149765	0.999998	TRUE
Gm17733	1.92847	0.00230642	-0.708296	0.999998	FALSE
Syn2	0.971784	8.22422e-08	-0.229897	0.999998	FALSE
Pparg	1.52212	3.68172e-10	-0.491736	0.999998	TRUE
Ift122	0.318031	0.00217558	-0.0135489	0.999998	TRUE
Rho	1.34567	0.0161905	0.130319	0.999998	FALSE
Zfand4	0.397046	0.0139578	-0.216192	0.999998	FALSE
Dcp1b	0.360554	0.0136669	-0.0011729	0.999998	TRUE
Wnk1	0.31388	0.000138891	-0.0254448	0.999998	TRUE
B4galnt3	0.578813	0.0354213	-0.382331	0.999998	FALSE
Kdm5a	0.310349	5.33954e-05	-0.119255	0.999998	TRUE
Il17ra	0.494494	6.12397e-06	-0.0429572	0.999998	TRUE
Cecr5	0.405783	3.58015e-05	0.0541394	0.999998	TRUE
Cecr2	0.457534	6.85842e-05	-0.286513	0.999998	TRUE
Slc25a18	0.484744	0.000774823	0.116701	0.999998	TRUE
Bid	0.198098	0.0923353	-0.0261802	0.999998	TRUE
Pex26	0.266095	0.0403912	-0.100611	0.999998	TRUE
Tuba8	0.54753	0.00758366	-0.259315	0.999998	FALSE
Rimklb	0.659396	3.04411e-09	-0.262693	0.999998	TRUE
Dppa3	1.09044	0.0553964	-0.617472	0.999998	FALSE
Slc2a3	0.29342	0.0188283	0.117384	0.999998	TRUE
Necap1	0.173857	0.0900731	-0.0224667	0.999998	TRUE
Zfp384	0.19601	0.063778	-0.021515	0.999998	TRUE
4930417O13Rik	0.692156	0.0309933	-0.180209	0.999998	FALSE
Tuba3a	0.45857	9.691e-05	-0.308792	0.819057	TRUE
9330102E08Rik	0.569222	0.00405227	-0.0210353	0.999998	TRUE
Gm18609	0.489852	0.0508117	-0.296539	0.999998	FALSE
Fkbp4	0.22514	0.0116735	-0.0913995	0.999998	TRUE
Clec12b	0.701014	0.0113548	0.147437	0.999998	TRUE
Borcs5	0.370417	0.0183516	-0.119884	0.999998	FALSE
Crebl2	0.895041	3.97541e-15	0.107973	0.999998	TRUE
Plekha5	0.376561	0.000264019	-0.035991	0.999998	TRUE
Slco1a5	1.65947	3.13111e-07	0.0197876	0.999998	FALSE
Ldhb	0.315646	0.000826272	0.0391325	0.999998	TRUE
C2cd5	0.689571	1.12649e-09	-0.189741	0.999998	TRUE
Etnk1	0.774137	3.33106e-14	-0.0624545	0.999998	TRUE
1700126G02Rik	0.622896	0.0012406	-0.212526	0.999998	FALSE
Casc1	0.919942	0.0887157	0.0239741	0.999998	FALSE
Gm15543	1.22016	0.0354626	-0.407741	0.999998	FALSE
Kras	0.214868	0.024866	-0.000382428	0.999998	TRUE
Gm44164	1.44053	0.00640652	0.232886	0.999998	FALSE
Gm15706	0.753684	0.0670965	0.248488	0.999998	FALSE
Tuba3b	0.397046	0.000414503	-0.33336	0.248856	TRUE
Asun	0.333629	0.00232874	-0.0556296	0.999998	TRUE
Fgfr1op2	0.201801	0.0320454	-0.0176569	0.999998	TRUE
Stk38l	0.314674	0.00270532	-0.0791714	0.999998	TRUE
Caprin2	0.461097	5.45024e-06	-0.218387	0.999998	TRUE
Gm7353	0.202662	0.0940701	-0.0635038	0.999998	FALSE
Cacng6	0.799331	0.06835	-0.170811	0.999998	FALSE
Ndufa3	0.247608	0.0291664	0.00602071	0.999998	FALSE
Tmc4	0.667945	0.0328022	0.220517	0.999998	FALSE
Ttyh1	0.496401	4.78472e-06	0.00898572	0.999998	TRUE
D030047H15Rik	0.54769	0.000166373	-0.101349	0.999998	FALSE
Leng8	0.21892	0.0552838	-0.0099739	0.999998	TRUE
Leng9	0.443725	0.00253917	-0.0794917	0.999998	TRUE
1700027J19Rik	0.751862	1.20677e-12	0.0307883	0.999998	FALSE
Ppp1r12c	0.206626	0.0402887	0.00697055	0.999998	TRUE
Tnni3	0.286884	0.00879714	0.107464	0.999998	TRUE
Dnaaf3	0.681655	0.0241824	-0.0701887	0.999998	FALSE
Syt5	0.877058	0.0450993	-0.148811	0.999998	FALSE
Ppp6r1	0.219667	0.00754473	-0.0581299	0.999998	TRUE
Brsk1	0.608567	0.000412659	0.0980191	0.999998	TRUE
Tmem150b	0.53826	0.0925398	0.113769	0.999998	FALSE
Kmt5c	0.226824	0.047323	0.0167638	0.999998	FALSE
Epn1	0.220164	0.0174988	0.01989	0.999998	TRUE
Zfp667	0.261568	0.0471816	0.00890739	0.999998	TRUE
Zfp264	0.719253	0.00504285	-0.101057	0.999998	FALSE
Gm10179	0.421186	0.00795896	-0.0602452	0.999998	FALSE
Zscan18	0.416007	0.0089419	0.13698	0.999998	TRUE
Zfp541	2.3302	9.92142e-34	-0.817929	0.9441	FALSE
Ppp5c	0.290815	0.00392003	-0.0724049	0.999998	TRUE
Sycp1-ps1	1.19639	3.70732e-08	-0.536007	0.999998	FALSE
Dmpk	0.279707	0.0881395	0.0207962	0.999998	TRUE
Gm4969	2.78923	1.94216e-17	-1.03978	0.00418423	FALSE
Fbxo46	0.294607	0.0126799	0.0608682	0.999998	TRUE
Ercc2	0.396215	0.000241958	-0.0877304	0.999998	TRUE
Gm26852	0.380092	0.029783	-0.0467188	0.999998	FALSE
Klc3	0.419251	0.0042166	-0.0712448	0.999998	FALSE
Mark4	0.380784	2.62316e-05	0.0202362	0.999998	TRUE
Relb	0.321591	0.0560865	-0.0985679	0.999998	FALSE
Gm20512	0.354455	0.0158977	0.0176582	0.999998	FALSE
Nectin2	0.206608	0.0123	0.0682	0.999998	FALSE
Cblc	2.04168	0.0138868	-0.012055	0.999998	FALSE
Bcl3	0.869968	1.5569e-08	0.124929	0.999998	TRUE
Tex101	1.25774	3.85468e-22	-0.304714	0.999998	TRUE
Lypd4	2.97067	0.000180583	-1.7017	0.999998	FALSE
Dmrtc2	2.48315	1.01465e-21	-0.757452	0.999998	FALSE
Prr19	0.38405	0.0271194	-0.336959	0.999998	TRUE
4732471J01Rik	0.386314	0.0709221	0.0322155	0.999998	FALSE
B3gnt8	0.177261	0.0629851	0.018348	0.999998	TRUE
Bckdha	0.202576	0.0230045	-0.00177986	0.999998	TRUE
Exosc5	0.286367	0.0261288	0.0423661	0.999998	FALSE
Tgfb1	0.235375	0.090352	0.000954049	0.999998	TRUE
Cyp2s1	0.987537	4.62879e-11	0.063182	0.999998	TRUE
Rab4b	0.235546	0.0704523	0.0641428	0.999998	TRUE
Gm21983	0.226634	0.0848104	0.0684353	0.999998	FALSE
Shkbp1	0.35654	0.0358667	0.0935602	0.999998	TRUE
Sertad3	0.252254	0.0935399	0.0217014	0.999998	TRUE
Sertad1	0.257356	0.0743063	0.0496273	0.999998	FALSE
Pld3	0.248904	0.0113737	0.036866	0.999998	TRUE
Zfp850	0.272763	0.0294722	-0.0872103	0.999998	FALSE
Dyrk1b	0.314216	0.00958704	-0.0356156	0.999998	TRUE
Dll3	1.66968	2.53174e-09	-0.80583	0.999998	FALSE
Supt5	0.28077	0.000562993	-0.0780466	0.999998	TRUE
Gm44709	0.244629	0.0697249	-0.108065	0.999998	FALSE
Plekhg2	0.221799	0.048293	-0.0874079	0.999998	TRUE
Med29	0.222821	0.0470432	-0.0679979	0.999998	FALSE
Samd4b	0.343288	8.16376e-05	-0.0712824	0.999998	TRUE
Acp7	1.52125	4.09877e-15	-0.115361	0.999998	FALSE
Gm44618	1.6011	1.79484e-06	-0.30928	0.999998	FALSE
Nfkbib	0.313349	0.0249634	0.0192198	0.999998	TRUE
Kcnk6	0.458793	0.000489921	0.0452188	0.999998	TRUE
Dpf1	0.712056	1.43437e-06	-0.179591	0.999998	TRUE
Sipa1l3	0.310759	0.00570877	-0.0859085	0.999998	TRUE
Cox7a1	0.41465	0.0820757	0.108006	0.999998	FALSE
Capns1	0.298515	0.00017982	0.0672234	0.999998	TRUE
Wdr62	0.239223	0.0321352	0.0168519	0.999998	TRUE
Syne4	1.18099	0.0401195	0.60056	0.999998	FALSE
Arhgap33	0.322324	0.0275836	0.0747765	0.999998	TRUE
Kmt2b	0.352023	0.000176307	-0.00333922	0.999998	TRUE
Zbtb32	0.634984	1.99462e-05	-0.366447	0.999998	TRUE
Lsr	0.191841	0.0774378	0.0587444	0.999998	TRUE
Gramd1a	0.533313	8.88692e-07	0.194731	0.999998	TRUE
Uba2	0.1793	0.0659341	-0.115422	0.999998	TRUE
Pdcd2l	0.244945	0.0820397	-0.0910661	0.999998	TRUE
Gm12758	0.317043	0.000590348	-0.054048	0.999998	FALSE
4931406P16Rik	0.352285	5.05963e-05	-0.0750293	0.999998	TRUE
Rhpn2	0.742438	1.08916e-08	0.022089	0.999998	TRUE
Pdcd5	0.206073	0.0307264	-0.0745434	0.999998	TRUE
Zfp536	2.5142	1.80651e-18	0.146173	0.999998	FALSE
Ccne1	0.358511	0.0179203	-0.0842838	0.999998	FALSE
Zfp788	0.236652	0.0807862	-0.00943395	0.999998	FALSE
Gm7224	0.63912	6.33054e-06	-0.0236673	0.999998	FALSE
Zfp715	0.334709	0.00280242	0.0769017	0.999998	TRUE
2410002F23Rik	0.403476	3.96411e-06	0.0833623	0.999998	TRUE
Gm28496	0.424605	0.000715845	0.00577184	0.999998	FALSE
Acpt	0.380545	0.00449516	0.127907	0.999998	FALSE
Shank1	0.769066	0.090352	-0.139008	0.999998	FALSE
Nr1h2	0.17756	0.0751134	-0.0615462	0.999998	TRUE
Myh14	0.450496	0.00189653	0.00468485	0.999998	TRUE
Zfp473	0.792928	0.00216565	-0.234718	0.999998	FALSE
Ap2a1	0.244983	0.0104003	-0.0688366	0.999998	TRUE
Slc17a7	1.03895	8.22781e-08	-0.452336	0.999998	TRUE
Ccdc155	1.7278	4.93317e-10	-0.407342	0.999998	TRUE
Ppp1r15a	0.2309	0.0291664	-0.0791281	0.999998	TRUE
Bcat2	0.282847	0.00616697	0.116153	0.999998	TRUE
Rasip1	0.40819	0.0103343	-0.206811	0.999998	FALSE
Car11	0.646841	0.0224547	-0.0148821	0.999998	TRUE
Dbp	0.45774	1.45591e-05	0.0185307	0.999998	TRUE
Sphk2	0.356362	5.32043e-05	0.0376372	0.999998	TRUE
Lmtk3	0.613551	0.0667832	-0.076808	0.999998	FALSE
Cyth2	0.502624	2.14103e-08	-0.0112522	0.999998	TRUE
Grin2d	0.491046	0.0531014	-0.0524277	0.999998	TRUE
Syngr4	1.36776	9.51946e-09	-0.103941	0.999998	TRUE
Kcnj11	1.489	0.00684345	-0.185632	0.999998	FALSE
Gtf2h1	0.343792	3.9468e-05	-0.0419755	0.999998	TRUE
Tsg101	0.213676	0.0145643	0.00520234	0.999998	TRUE
Ptpn5	1.06271	0.0464143	0.0958705	0.999998	FALSE
Zdhhc13	0.41512	5.60131e-05	-0.131904	0.999998	TRUE
Htatip2	0.366588	0.0719923	0.00737507	0.999998	FALSE
Tubgcp5	0.334223	0.00207712	-0.0371088	0.999998	TRUE
Herc2	0.297224	0.00504584	0.043487	0.999998	TRUE
9330162G02Rik	0.366266	0.0618243	-0.0783285	0.999998	FALSE
Gm10297	0.39928	0.000235863	0.0440981	0.999998	FALSE
Chrna7	0.716188	0.0102279	-0.347615	0.999998	TRUE
Otud7a	0.641445	0.0391626	-0.394204	0.999998	FALSE
Ntrk3	0.442425	0.0953895	-0.00157808	0.999998	TRUE
Acan	0.331234	0.0795852	-0.0917387	0.999998	TRUE
Fanci	0.255291	0.0161053	-0.0808706	0.999998	TRUE
Polg	0.186486	0.0423239	-0.0585177	0.999998	TRUE
Mir9-3hg	1.2272	0.000608856	-0.748419	0.999998	FALSE
Pex11a	0.812018	3.02553e-12	-0.0216886	0.999998	TRUE
Wdr93	0.957257	0.0232931	0.158607	0.999998	FALSE
Mesp2	0.822154	0.00507208	-0.466684	0.999998	FALSE
Cib1	0.337962	0.00253885	-0.108006	0.999998	FALSE
Ttll13	0.897522	0.0116992	-0.282384	0.999998	FALSE
Vps33b	0.280401	0.0540094	-0.0580835	0.999998	TRUE
Unc45a	0.324056	0.00531842	-0.0853114	0.999998	TRUE
Furin	0.275772	0.000473702	0.0346322	0.999998	TRUE
Nmb	0.542351	0.0431865	-0.28858	0.999998	FALSE
Pde8a	0.380736	0.00113041	0.0354757	0.999998	TRUE
Cpeb1	1.30562	5.62978e-26	-0.357166	0.999998	TRUE
Homer2	0.357244	0.0329327	-0.14768	0.999998	TRUE
Gm44570	0.512507	0.0666702	-0.109392	0.999998	FALSE
Bnc1	0.238995	0.0947041	-0.131971	0.999998	TRUE
Sh3gl3	0.339595	0.000869456	-0.029325	0.999998	TRUE
Phgdh-ps1	0.347307	0.0430109	0.110026	0.999998	FALSE
Cfap161	0.699858	0.017961	-0.0500206	0.999998	FALSE
Tmem135	0.358743	4.71738e-05	0.0282914	0.999998	TRUE
Gm45221	1.26258	0.0635282	0.31919	0.999998	FALSE
Ccdc90b	0.214209	0.0488575	0.0064237	0.999998	TRUE
Ankrd42	0.359345	0.00283152	0.0249619	0.999998	TRUE
6430511E19Rik	0.802515	0.0811211	-0.218338	0.999998	FALSE
Ddias	0.216809	0.0795852	-0.182665	0.999998	TRUE
Aqp11	0.47269	0.0325966	0.0348282	0.999998	TRUE
Pak1	0.658579	3.81932e-07	-0.196942	0.999998	FALSE
Acer3	0.595443	7.2795e-09	-0.0662419	0.999998	FALSE
Dgat2	0.482192	0.000530296	-0.362135	0.999998	TRUE
Tpbgl	4.26817	1.46271e-45	0.331821	0.999998	FALSE
Gm10605	2.57369	1.70889e-09	0.141402	0.999998	FALSE
Xrra1	0.663326	0.0528092	-0.284038	0.999998	FALSE
Chrdl2	0.766419	0.0790779	-0.1049	0.999998	FALSE
Pgm2l1	0.583871	1.74303e-07	-0.24202	0.999998	TRUE
Ppme1	0.169745	0.0839074	-0.0466883	0.999998	TRUE
Rab6a	0.171065	0.0519248	0.0143043	0.999998	TRUE
Plekhb1	0.565709	0.00522471	-0.197523	0.999998	TRUE
Relt	0.761271	0.000555743	-0.113509	0.999998	TRUE
P2ry2	0.905994	8.14094e-14	-0.0529777	0.999998	TRUE
Fchsd2	0.180166	0.0694276	0.0208299	0.999998	TRUE
Stard10	0.99043	3.00356e-11	0.0265969	0.999998	TRUE
Clpb	0.211211	0.0250741	-0.0580746	0.999998	FALSE
Folr2	0.612077	0.0435124	-0.12768	0.999998	FALSE
Lrrc51	0.49903	0.0147046	-0.175336	0.999998	FALSE
Pgap2	0.216121	0.0168665	0.117243	0.999998	TRUE
00R_Pgap2	0.25897	0.0323607	0.114159	0.999998	FALSE
Stim1	0.641341	1.06969e-12	0.00172316	0.999998	TRUE
Gm16464	0.297851	0.0453827	-0.197261	0.999998	FALSE
Fam160a2	0.19751	0.0730027	-0.08802	0.999998	TRUE
Apbb1	0.297809	0.023058	-0.233808	0.999998	TRUE
Rbmxl2	0.38559	0.0753126	-0.499863	0.757347	TRUE
Syt9	0.436886	0.000113556	-0.147746	0.999998	TRUE
Tub	0.96134	2.14867e-09	-0.0896672	0.999998	TRUE
Ric3	1.36753	3.37562e-18	-0.0862546	0.999998	TRUE
Lmo1	0.721976	0.000773842	-0.405217	0.999998	FALSE
Stk33	1.45916	1.77898e-06	-0.490601	0.999998	FALSE
Tmem9b	0.212712	0.071362	-0.0735938	0.999998	TRUE
Nrip3	1.42881	3.82076e-18	-0.688014	0.512943	FALSE
Scube2	1.24995	2.39938e-09	-0.216341	0.999998	TRUE
Ampd3	0.671294	0.00771746	0.468306	0.999998	FALSE
Rnf141	0.294457	0.000998129	-0.0198212	0.999998	TRUE
Ctr9	0.202485	0.0200014	-0.0145841	0.999998	TRUE
Usp47	0.166418	0.0697773	-0.036594	0.999998	TRUE
Btbd10	0.447619	1.57289e-06	-0.225471	0.999998	TRUE
Rras2	0.333971	0.000112655	0.00513481	0.999998	TRUE
Pde3b	0.453318	0.000151848	-0.185139	0.999998	TRUE
Plekha7	0.405612	0.000499745	-0.118355	0.999998	FALSE
Pik3c2a	0.276339	0.000973824	0.069698	0.999998	TRUE
Arl6ip1	0.191608	0.0156933	-0.0789444	0.999998	TRUE
Syt17	0.874953	0.000255436	-0.135158	0.999998	FALSE
Tmc7	1.00772	2.02208e-15	-0.0748919	0.999998	TRUE
Ccp110	1.03132	1.36737e-21	-0.308519	0.999998	TRUE
9030624J02Rik	0.218637	0.0270613	-0.00207391	0.999998	TRUE
2610020H08Rik	0.798899	4.13698e-12	-0.022262	0.999998	TRUE
Dcun1d3	0.335246	0.00344338	0.0310351	0.999998	TRUE
Polr3e	0.206274	0.0450097	-0.112033	0.999998	TRUE
Cdr2	0.419797	0.0018697	-0.268845	0.999998	TRUE
Mfsd13b	1.71337	0.00169686	-0.602856	0.999998	FALSE
Usp31	0.425915	9.04038e-06	-0.00593089	0.999998	TRUE
Cog7	0.244081	0.037381	0.0422999	0.999998	TRUE
Palb2	0.234119	0.0944418	-0.0934883	0.999998	TRUE
Zkscan2	0.70613	6.07757e-05	-0.0560999	0.999998	TRUE
Il4ra	0.330756	0.00522855	-0.0541786	0.999998	TRUE
Nfatc2ip	0.999224	1.98203e-15	-0.050635	0.999998	TRUE
Gm45141	0.636036	0.0566238	-0.261634	0.999998	FALSE
Cln3	0.432815	0.000294509	0.0100082	0.999998	TRUE
Sgf29	0.224007	0.0656422	-0.0240791	0.999998	FALSE
Mapk3	0.149585	0.0893226	0.0633859	0.999998	TRUE
Kctd13	0.747846	1.02821e-08	0.0372741	0.999998	TRUE
Gm21984	0.703738	0.00179088	0.177282	0.999998	FALSE
Mvp	0.351024	0.0066431	0.00923427	0.999998	TRUE
Fbrs	0.262858	0.00727222	-0.0803941	0.999998	TRUE
Fbxl19	0.333764	0.000918544	-0.0327026	0.999998	TRUE
Setd1a	0.293869	0.00102798	-0.105499	0.999998	TRUE
RP23-325D10.3	0.226207	0.0103653	-0.100142	0.999998	FALSE
Prss8	0.719803	0.0375923	0.346252	0.999998	FALSE
Prss36	0.420159	0.0218758	-0.136982	0.999998	TRUE
Inpp5f	0.239071	0.0149012	-0.0681358	0.999998	TRUE
Gm44672	0.511766	0.0727026	-0.308283	0.999998	FALSE
Sec23ip	0.3273	0.000419332	-0.122832	0.999998	TRUE
Wdr11	0.178664	0.0830475	0.0221472	0.999998	TRUE
Gm5903	0.159112	0.0942664	-0.0683364	0.999998	FALSE
Cuzd1	4.23346	3.69628e-22	1.09967	0.999998	FALSE
Oat	0.419413	3.7797e-07	0.0136365	0.999998	TRUE
Nkx1-2	2.08106	4.67893e-15	-0.267193	0.999998	FALSE
Gm16764	1.88188	0.063346	0.0046298	0.999998	FALSE
Lhpp	0.429646	0.000250222	-0.0358915	0.999998	TRUE
Edrf1	0.280319	0.00895415	-0.172204	0.999998	TRUE
Uros	0.323183	0.0445809	0.0861048	0.999998	TRUE
Dhx32	0.346252	8.82709e-05	-0.0503803	0.999998	TRUE
Gm45670	0.970476	0.0401533	-0.335268	0.999998	FALSE
Ebf3	1.40327	2.97005e-09	-0.317781	0.999998	TRUE
Gm45278	1.47117	0.000835621	-0.446305	0.999998	FALSE
Dpysl4	0.332368	0.00112872	0.10775	0.999998	TRUE
Lrrc27	0.463732	0.0244144	0.0115755	0.999998	TRUE
Gm2044	0.290133	0.0555489	0.211448	0.999998	FALSE
Syce1	1.02311	3.98376e-15	-0.403517	0.999998	TRUE
Lrrc56	0.457681	0.035843	0.0272676	0.999998	FALSE
Lmntd2	1.06844	0.000802097	0.146973	0.999998	TRUE
Irf7	0.861029	0.00242604	0.0731029	0.999998	FALSE
Drd4	2.30239	4.94971e-10	0.113534	0.999998	FALSE
Taldo1	0.25877	0.0456839	-0.115798	0.999998	TRUE
Cd151	0.243416	0.00842306	0.118681	0.999998	TRUE
Tollip	0.379064	1.27266e-06	0.0013519	0.999998	TRUE
Brsk2	0.69778	2.18494e-05	-0.331035	0.999998	TRUE
Ins2	1.32348	4.64543e-07	-0.179181	0.999998	FALSE
Ano1	0.661189	0.000170774	0.083368	0.999998	TRUE
Oraov1	0.41979	2.30359e-05	-0.0887627	0.999998	FALSE
Ccnd1	0.516199	8.20465e-06	-0.265717	0.999998	TRUE
Arhgef18	0.174028	0.0683201	0.0422415	0.999998	TRUE
Mcoln1	0.351776	0.00271983	0.071224	0.999998	FALSE
Cd209f	2.00225	0.000387739	0.382038	0.999998	FALSE
Cd209g	1.76738	0.0706252	0.607566	0.999998	FALSE
4932443L11Rik	0.725678	0.000242098	0.0593964	0.999998	FALSE
Evi5l	0.678875	4.16471e-12	-0.0288898	0.999998	TRUE
Tgfbr3l	0.475666	0.08745	-0.0846069	0.999998	FALSE
Rab20	0.391479	0.000914136	0.0894472	0.999998	TRUE
Cars2	0.287616	0.0787239	0.0226789	0.999998	TRUE
Tdrp	0.847719	5.99396e-17	0.0482844	0.999998	TRUE
Arhgef10	0.273888	0.00862356	0.0873139	0.999998	TRUE
Defb40	6.00442	0.00014147	3.62861	0.999998	FALSE
Defb2	5.7043	1.89134e-05	3.20065	0.999998	FALSE
Atp7b	0.736948	0.00975544	-0.273922	0.999998	FALSE
Nek3	0.426014	0.0562409	-0.167172	0.999998	TRUE
Slc20a2	0.172894	0.0720884	0.0972612	0.999998	TRUE
Plat	1.09212	1.50901e-20	0.0130234	0.999998	TRUE
Gm15816	1.14763	0.0675404	0.156537	0.999998	FALSE
Tacc1	0.348239	2.67049e-06	0.110387	0.999998	TRUE
Ddhd2	0.562047	2.83357e-07	-0.0988472	0.999998	TRUE
Gm45250	1.02724	0.0455449	0.423981	0.999998	FALSE
Rab11fip1	0.932383	6.7327e-14	0.0050963	0.999998	TRUE
4933416M07Rik	0.750832	0.00334649	0.0586998	0.999998	FALSE
Unc5d	0.797672	0.000559233	-0.497043	0.999998	TRUE
Tex15	1.26843	3.44783e-38	-0.353956	0.757347	TRUE
Gm16793	0.789967	0.0893552	-0.239122	0.999998	FALSE
Lonrf1	0.253458	0.0599528	-0.0741357	0.999998	TRUE
Micu3	0.388397	0.0605325	-0.0980455	0.999998	FALSE
Pdgfrl	0.521894	0.0176853	0.0677963	0.999998	FALSE
Helt	1.27964	0.025886	0.245689	0.999998	FALSE
Acsl1	0.674266	4.88017e-09	-0.257394	0.999998	FALSE
Primpol	0.345873	0.00655808	-0.0113529	0.999998	TRUE
Nek1	0.460323	2.71332e-06	-0.135802	0.999998	TRUE
Cpe	0.292432	0.000103413	0.0747325	0.999998	TRUE
Slc18a1	1.12575	0.0844755	0.286062	0.999998	FALSE
Mau2	0.252549	0.00398113	0.0100277	0.999998	TRUE
Sugp1	0.334546	0.000285346	-0.0839177	0.999998	TRUE
Hapln4	0.924474	0.0355407	-0.614317	0.999998	FALSE
Slc25a42	0.68622	0.000222121	-0.0289026	0.999998	TRUE
Sugp2	0.377671	0.000183337	-0.129372	0.999998	TRUE
Tmem59l	0.404793	0.0151407	-0.0410981	0.999998	TRUE
Ell	0.436392	6.26519e-06	-0.0668021	0.999998	TRUE
Mpv17l2	0.316313	0.0480409	-0.124198	0.999998	FALSE
Mast3	0.230595	0.0678107	-0.039809	0.999998	TRUE
Kcnn1	0.616076	0.058097	-0.523053	0.999998	FALSE
Slc5a5	1.69134	0.00804134	-0.239486	0.999998	FALSE
Slc27a1	0.239423	0.0103023	0.00807291	0.999998	TRUE
Colgalt1	0.439655	7.78872e-06	0.0398829	0.999998	FALSE
Unc13a	0.515093	2.07087e-06	0.0786807	0.999998	FALSE
Jak3	0.191403	0.0972626	0.0884007	0.999998	FALSE
Insl3	0.198885	0.0934423	0.118332	0.999998	FALSE
Cherp	0.220055	0.0268148	-0.150464	0.999998	TRUE
Med26	0.266849	0.0437938	-0.0752128	0.999998	TRUE
Sin3b	0.298957	0.00038558	0.0510343	0.999998	TRUE
Rasd2	0.309854	0.0161335	-0.26748	0.999998	TRUE
Abce1	0.188861	0.0552072	-0.0708712	0.999998	TRUE
Smarca5	0.145331	0.0889962	-0.104774	0.999998	TRUE
Clgn	0.663675	0.00349444	-0.245991	0.999998	TRUE
Pkn1	0.413359	0.00016628	0.0549575	0.999998	TRUE
Ptger1	0.434072	0.000398533	0.0470283	0.999998	FALSE
Adgre5	0.347819	0.0446585	-0.0508021	0.999998	FALSE
Asf1b	0.646873	5.94614e-11	-0.290157	0.97936	TRUE
Dcaf15	0.215445	0.0717122	-0.0336492	0.999998	TRUE
4930432K21Rik	0.796806	4.99642e-07	-0.182854	0.999998	TRUE
Zswim4	0.390891	3.05831e-05	-0.10197	0.999998	TRUE
Ccdc130	0.312625	0.0999929	0.0722034	0.999998	TRUE
Farsa	0.230615	0.0372853	-0.0991539	0.999998	TRUE
Syce2	0.468764	1.79818e-05	-0.255485	0.999998	TRUE
Mast1	0.645671	0.0457246	0.208733	0.999998	FALSE
Asna1	0.276975	0.0220649	-0.0971602	0.999998	FALSE
Fbxw9	0.443566	0.000167585	0.000819045	0.999998	TRUE
Dhps	0.373715	0.00574057	-0.083926	0.999998	TRUE
Gpt2	0.87388	1.50582e-15	-0.0301207	0.999998	TRUE
Neto2	0.259928	0.0559919	-0.278815	0.999998	TRUE
Lonp2	0.164445	0.0920481	-0.0202498	0.999998	TRUE
Nkd1	0.473821	0.000614346	0.0145566	0.999998	TRUE
Cyld	0.672127	8.89772e-13	-0.0532652	0.999998	TRUE
Tox3	0.656577	0.0101969	-0.1823	0.999998	TRUE
Rpgrip1l	0.26334	0.0238999	-0.0632208	0.999998	TRUE
Gm45463	2.02524	0.0552677	0.192488	0.999998	FALSE
Ces1a	1.6454	0.0774795	-0.366527	0.999998	FALSE
Ces1d	1.32182	0.0398634	0.698675	0.999998	FALSE
Ces5a	6.41876	1.29693e-12	2.2141	0.999998	FALSE
Gnao1	0.47341	0.00137508	-0.170263	0.999998	TRUE
Amfr	0.324497	2.80781e-05	0.0104115	0.999998	TRUE
Ogfod1	0.218124	0.0828209	-0.0944833	0.999998	TRUE
Bbs2	0.320723	0.026557	0.102899	0.999998	TRUE
Mt3	0.510652	0.00388972	-0.0503762	0.999998	FALSE
Mt1	0.377462	0.00166785	-0.205121	0.999998	TRUE
Nup93	0.336826	0.00358482	-0.1956	0.999998	TRUE
Cpne2	0.46132	0.027465	-0.137275	0.999998	TRUE
Rspry1	0.485819	4.13831e-06	-0.121215	0.999998	TRUE
Ciapin1	0.537639	8.98935e-06	-0.0305234	0.999998	TRUE
Katnb1	0.353631	0.00113985	0.0516182	0.999998	TRUE
Ndrg4	0.438028	0.000116162	-0.25123	0.999998	TRUE
Setd6	0.539586	0.000966973	-0.0705812	0.999998	TRUE
Terb1	1.99438	1.79326e-17	-0.799516	0.999998	FALSE
Car7	1.38024	0.00132054	0.0220855	0.999998	FALSE
Fam96b	0.280478	0.0576092	0.0182535	0.999998	TRUE
Ces2g	0.428853	0.0211501	0.101172	0.999998	FALSE
Tmem208	0.277489	0.0754071	0.111498	0.999998	FALSE
Slc9a5	0.982935	0.000177926	0.0452808	0.999998	FALSE
Plekhg4	0.788504	5.56163e-10	-0.270297	0.999998	TRUE
Kctd19	3.09745	5.91875e-05	-0.25783	0.999998	FALSE
Atp6v0d1	0.189459	0.0462181	-0.106928	0.999998	TRUE
Fam65a	0.405608	0.000225839	0.080089	0.999998	TRUE
Acd	0.212097	0.0909661	-0.00525044	0.999998	TRUE
RP24-248F14.2	1.64327	1.0354e-12	-0.294551	0.999998	FALSE
Dpep3	1.78802	9.99644e-39	-0.479369	0.521627	TRUE
Slc7a6	0.555542	4.9777e-08	0.0136245	0.999998	TRUE
Slc7a6os	0.258967	0.0450531	-0.0154644	0.999998	TRUE
Prmt7	0.203103	0.0864526	-0.113375	0.999998	TRUE
Smpd3	0.873947	0.00014158	0.0833353	0.999998	TRUE
Nfat5	0.358196	0.00123419	0.0117556	0.999998	TRUE
Ap1g1	0.198765	0.0175012	-0.0210324	0.999998	TRUE
Zfp612	0.387555	0.00638025	-0.0526836	0.999998	TRUE
Gm21964	1.61666	2.18286e-08	-0.810109	0.999998	FALSE
Hydin	0.846763	0.055973	-0.415566	0.999998	FALSE
Cog4	0.183786	0.06464	-0.0341607	0.999998	TRUE
Pdpr	0.187564	0.0489796	0.0140382	0.999998	TRUE
Rfwd3	0.149065	0.0908982	-0.0297284	0.999998	TRUE
RP23-265B15.1	0.54538	0.00495174	-0.132185	0.999998	FALSE
Cdyl2	0.669742	1.21494e-05	-0.0796831	0.999998	TRUE
Atmin	0.268235	0.0118015	-0.116525	0.999998	TRUE
1700030J22Rik	0.4639	0.0155137	0.012303	0.999998	TRUE
Mlycd	0.29523	0.0552677	0.0445559	0.999998	TRUE
Hsdl1	0.334214	0.00022059	0.0383783	0.999998	TRUE
Dnaaf1	0.284288	0.0625619	0.103503	0.999998	FALSE
Taf1c	0.329133	0.00728105	-0.0221174	0.999998	TRUE
Klhl36	0.731718	5.71558e-09	0.019087	0.999998	TRUE
Crispld2	0.327395	0.00874448	0.00349578	0.999998	TRUE
6430548M08Rik	0.831979	4.48313e-08	-0.251925	0.999998	TRUE
Fbxo31	0.239912	0.0465243	-0.0353972	0.999998	TRUE
Map1lc3b	0.382207	1.51404e-06	-0.0280917	0.999998	TRUE
Rnf166	0.272801	0.0168477	0.0364724	0.999998	TRUE
Dpep1	0.503125	0.000498055	0.107075	0.999998	TRUE
Fanca	0.244131	0.0489041	-0.116362	0.999998	TRUE
Spire2	0.532923	1.3605e-05	0.123118	0.999998	TRUE
Tubb3	0.979776	1.04232e-18	0.102755	0.999998	TRUE
Dbndd1	1.14352	1.64326e-09	0.0225114	0.999998	FALSE
Rab4a	0.260694	0.0874602	-0.046831	0.999998	TRUE
Nup133	0.229638	0.0374479	-0.166959	0.999998	TRUE
Cog2	0.21105	0.0291834	0.0515975	0.999998	TRUE
Sprtn	0.247783	0.00667521	-0.0880436	0.999998	TRUE
Sipa1l2	0.365198	0.000602813	-0.0731512	0.999998	TRUE
Cep126	0.473988	0.0357563	-0.209578	0.999998	FALSE
Sesn3	0.535744	7.30481e-09	0.0115333	0.999998	TRUE
Kdm4d	0.825537	0.0755442	-0.0828426	0.999998	FALSE
Piwil4	0.554602	0.0110675	-0.341073	0.999998	TRUE
Med17	0.336652	0.000588185	-0.080768	0.999998	TRUE
Taf1d	0.194252	0.0589089	-0.10678	0.999998	TRUE
Cep295	0.190868	0.0579021	-0.0100539	0.999998	FALSE
Gm5612	0.571333	0.0549709	-0.093489	0.999998	FALSE
Ubl5	0.220106	0.0228641	-0.0572054	0.999998	FALSE
Pin1	0.24892	0.018087	-0.0592241	0.999998	FALSE
Angptl6	0.412453	0.0780034	-0.120763	0.999998	TRUE
Mrpl4	0.230166	0.0568824	-0.103308	0.999998	TRUE
Zglp1	1.13012	4.47479e-10	-0.335599	0.999998	FALSE
RP23-186O3.13	0.385979	0.00288428	-0.0595619	0.999998	FALSE
Tyk2	0.442238	0.000166575	-0.10133	0.999998	TRUE
Atg4d	0.309439	0.00116582	-0.0192324	0.999998	TRUE
Kri1	0.336903	0.00450363	-0.026499	0.999998	TRUE
Cdkn2d	0.579895	1.42281e-07	-0.0229435	0.999998	TRUE
Ap1m2	0.630823	0.000642884	0.167481	0.999998	TRUE
Dnm2	0.206458	0.0242049	0.0030308	0.999998	TRUE
Elavl3	1.52605	3.86583e-08	-0.837012	0.999998	FALSE
Zfp653	0.553488	0.000141345	-0.101152	0.999998	TRUE
Gm16845	0.655717	0.00353437	-0.0837645	0.999998	TRUE
Ecsit	0.716613	3.33672e-08	-0.15225	0.999998	FALSE
Cnn1	0.585746	0.00144158	-0.0648915	0.999998	FALSE
Acp5	0.563848	0.00608956	0.0359551	0.999998	TRUE
Bbs9	0.415045	0.000258943	-0.0981941	0.999998	TRUE
Glb1l2	0.534672	6.46588e-06	0.0141573	0.999998	TRUE
Glb1l3	0.570147	1.30912e-07	0.0747801	0.999998	TRUE
Jam3	0.435612	3.96837e-07	-0.00830961	0.999998	TRUE
RP24-79I19.5	0.431082	3.19875e-05	0.0151375	0.999998	FALSE
Arhgap32	0.239776	0.00971116	-0.0854259	0.999998	TRUE
Foxred1	0.268796	0.023063	0.0241513	0.999998	TRUE
Ddx25	0.477645	0.000637102	-0.289381	0.999998	TRUE
Gm17727	1.75153	0.000771761	-0.149433	0.999998	FALSE
Gm27235	1.63217	4.55081e-06	-0.0405104	0.999998	FALSE
D730048I06Rik	1.73713	2.26408e-08	0.390184	0.999998	FALSE
Spa17	0.374305	0.0922529	-0.141905	0.999998	TRUE
2610203C20Rik	0.520742	0.0556499	0.360253	0.999998	FALSE
Sorl1	1.30675	4.10135e-39	0.0227914	0.999998	TRUE
Gm16214	1.64866	0.000626606	-0.097673	0.999998	FALSE
Tecta	1.37087	0.0173385	-0.17742	0.999998	FALSE
Usp2	0.362433	0.00850924	-0.184005	0.999998	TRUE
C2cd2l	0.333358	0.0696732	-0.117524	0.999998	FALSE
Hmbs	0.227509	0.0695568	0.0146086	0.999998	TRUE
Vps11	0.293972	0.000321351	0.0238779	0.999998	TRUE
Hyou1	0.367177	9.15137e-05	-0.126007	0.999998	TRUE
Trappc4	0.306792	0.0123044	-0.0654	0.999998	TRUE
Kmt2a	0.329597	0.0272632	-0.0609448	0.999998	TRUE
RP23-23P9.5	0.483897	0.0821783	0.0770958	0.999998	FALSE
Cd3e	2.04394	2.81783e-08	-0.374581	0.999998	FALSE
RP23-284E19.9	2.19859	0.0186147	-0.381349	0.999998	FALSE
Il10ra	0.533027	1.96266e-06	-0.123439	0.999998	TRUE
Pcsk7	0.353985	0.00288162	0.108412	0.999998	TRUE
Cadm1	0.339626	0.000871906	-0.0122405	0.999998	TRUE
Gm5616	0.223183	0.059453	-0.108473	0.999998	FALSE
Usp28	0.218293	0.0218915	-0.0113443	0.999998	TRUE
Tex12	0.933047	3.02228e-07	-0.579097	0.9441	TRUE
Dixdc1	0.343223	0.018191	-0.0169897	0.999998	TRUE
Sik2	0.350662	0.00126477	-0.0704937	0.999998	TRUE
Ddx10	0.253651	0.00917206	-0.173532	0.999998	TRUE
Atm	0.438231	8.11911e-06	-0.113539	0.999998	TRUE
Npat	0.254542	0.00412416	-0.0729132	0.999998	TRUE
Cul5	0.236596	0.0185114	-0.14271	0.999998	TRUE
Rab39	0.828161	0.00916946	-0.155905	0.999998	FALSE
Slc35f2	0.260599	0.037269	0.0287539	0.999998	TRUE
Dmxl2	0.625246	4.09247e-11	-0.202545	0.999998	TRUE
Ireb2	0.213858	0.0120992	-0.0410839	0.999998	TRUE
Chrna5	0.587365	0.0434993	-0.394461	0.999998	FALSE
Scaper	0.291921	0.00484563	-0.142249	0.999998	TRUE
Snx33	0.280199	0.00474492	0.0557663	0.999998	TRUE
Snupn	0.265298	0.0445973	-0.153086	0.999998	TRUE
Cox5a	0.307166	0.00908635	-0.0828573	0.999998	FALSE
Gm26631	0.357372	0.000299168	-0.049851	0.999998	FALSE
Arid3b	0.410149	0.000976389	-0.0772935	0.999998	TRUE
Sema7a	0.1762	0.0951632	0.118818	0.999998	TRUE
Rec114	0.339283	0.0576843	-0.263113	0.999998	TRUE
Parp6	0.612317	1.83338e-07	-0.155101	0.999998	TRUE
Gramd2	0.608731	0.000260828	-0.0544628	0.999998	TRUE
Myo9a	0.26508	0.0115664	-0.0263989	0.999998	TRUE
Gm10655	0.937531	0.0885421	-0.298464	0.999998	FALSE
Tle3	0.333038	0.00167006	-0.229804	0.999998	TRUE
Gm16759	0.660402	0.0425639	0.0232597	0.999998	FALSE
Iqch	1.36614	5.01e-08	0.091676	0.999998	FALSE
Aagab	0.467457	3.79135e-06	0.0569989	0.999998	TRUE
Uchl4	0.267935	0.0434415	-0.0675531	0.999998	FALSE
Rab11a	0.193493	0.0555876	0.0219799	0.999998	TRUE
Dennd4a	0.426125	9.85174e-05	-0.0612858	0.999998	TRUE
Hacd3	0.217074	0.0203384	0.0600409	0.999998	FALSE
RP24-131G14.4	0.422967	0.0684473	-0.0166801	0.999998	FALSE
Pdcd7	0.230773	0.0601189	-0.118417	0.999998	TRUE
Rbpms2	0.221815	0.0726289	-0.0396075	0.999998	FALSE
Zfp609	0.210858	0.0312029	-0.0874487	0.999998	TRUE
Dapk2	0.608675	0.000579506	-0.301103	0.999998	TRUE
Herc1	0.480308	1.43437e-06	-0.0721415	0.999998	TRUE
Gm28379	0.573315	0.0107942	-0.0643174	0.999998	FALSE
Usp3	0.176021	0.062412	-0.0109272	0.999998	TRUE
Aph1b	0.300201	0.0243098	-0.00349691	0.999998	TRUE
Ppp1r2-ps4	0.197324	0.0955896	-0.0274286	0.999998	FALSE
Aph1c	0.411171	0.0244381	0.00570363	0.999998	TRUE
Rps27l	0.239832	0.0348349	-0.0517957	0.999998	TRUE
Lactb	0.806828	1.32405e-09	0.176052	0.999998	TRUE
Vps13c	0.55148	6.05114e-09	-0.156445	0.999998	TRUE
Rnf111	0.186904	0.0763994	0.0756974	0.999998	TRUE
Aqp9	1.99854	0.0226674	0.34062	0.999998	FALSE
Aldh1a2	0.9565	1.70891e-22	-0.147749	0.999998	TRUE
Myzap	0.424239	4.79967e-05	-0.0918174	0.999998	TRUE
Prtg	0.324433	0.0450938	-0.20923	0.999998	TRUE
Fam214a	0.201552	0.0286229	0.0150101	0.999998	TRUE
4933433G15Rik	1.69337	0.0619203	0.254665	0.999998	FALSE
Gm7972	2.41032	1.07156e-38	-0.782106	0.513225	FALSE
5730403I07Rik	1.5875	0.0889264	-0.335201	0.999998	FALSE
Gclc	0.233628	0.0159102	-0.115295	0.999998	TRUE
Fbxo9	0.330035	0.000539248	-0.0566046	0.999998	TRUE
Gsta4	0.239476	0.0542471	0.0792233	0.999998	TRUE
Gsta1	0.247386	0.0479364	0.000988324	0.999998	TRUE
Gm3776	0.232583	0.0680897	0.007742	0.999998	TRUE
Gsta2	0.279276	0.00538016	0.0129891	0.999998	TRUE
Ddx43	0.82501	1.59675e-07	-0.333889	0.999998	FALSE
Filip1	0.431927	0.0347383	-0.0129582	0.999998	FALSE
Mei4	0.698881	0.000808794	-0.5039	0.999998	FALSE
Sh3bgrl2	0.216976	0.042083	-0.241866	0.999998	TRUE
Dopey1	0.529687	4.35638e-08	-0.0375539	0.999998	TRUE
Pgm3	0.556983	1.76997e-09	-0.0308554	0.999998	TRUE
Cep162	0.255217	0.0401494	-0.0301638	0.999998	TRUE
Rasgrf1	1.51992	0.0967403	0.443903	0.999998	FALSE
Paqr9	0.696956	0.0027304	-0.490301	0.999998	FALSE
Trpc1	1.39165	5.14684e-13	-0.542345	0.999998	FALSE
Pls1	0.637962	0.000391611	-0.43956	0.999998	TRUE
Atr	0.690439	2.54324e-14	-0.156493	0.999998	TRUE
Gm16794	0.516673	0.00143907	-0.146593	0.999998	FALSE
Rasa2	0.348466	0.00313409	-0.225971	0.999998	TRUE
Pxylp1	0.637126	0.000199011	-0.169536	0.999998	TRUE
Gm16185	0.502688	0.0284444	0.12218	0.999998	FALSE
Clstn2	0.451409	0.0101493	-0.231446	0.999998	TRUE
Rbp1	0.340676	0.0057436	-0.0451267	0.999998	FALSE
Copb2	0.179022	0.0441851	-0.115814	0.999998	TRUE
Pik3cb	0.310413	0.00814319	-0.141798	0.999998	TRUE
Gm37249	1.33893	1.78707e-07	-0.197748	0.999998	FALSE
Esyt3	1.51331	1.46271e-45	-0.0640536	0.999998	TRUE
Armc8	0.321126	0.000297851	-0.0740455	0.999998	TRUE
Rab6b	0.295406	0.0206167	-0.11533	0.999998	TRUE
Tmem108	0.866377	1.75857e-05	-0.0786908	0.999998	TRUE
Acad11	0.282513	0.016532	0.0355424	0.999998	TRUE
Gm38077	1.12877	0.0085357	0.379986	0.999998	FALSE
Nek11	0.95583	0.0190884	-0.128506	0.999998	FALSE
Rad54l2	0.270451	0.00641929	0.0555702	0.999998	TRUE
Vprbp	0.188142	0.0825048	-0.0483275	0.999998	TRUE
Manf	0.267487	0.0105884	-0.0172466	0.999998	TRUE
4930524O07Rik	0.564074	0.00154123	-0.165592	0.999998	FALSE
Dock3	0.736708	2.07341e-10	-0.346721	0.999998	TRUE
Mapkapk3	0.601539	0.000676912	0.154055	0.999998	TRUE
Hemk1	0.371775	0.074065	0.142918	0.999998	FALSE
Tusc2	0.348838	0.00132322	-0.0392143	0.999998	FALSE
Mon1a	0.408918	0.0248773	0.0562193	0.999998	TRUE
Camkv	0.555545	0.00925661	-0.0307544	0.999998	TRUE
Apeh	0.193614	0.0893226	-0.00934279	0.999998	TRUE
Tcta	0.257892	0.0711858	0.0927879	0.999998	TRUE
1700102P08Rik	1.15789	0.0267419	-0.460388	0.999998	FALSE
Ccdc36	1.27655	3.73192e-18	-0.572865	0.447124	TRUE
Klhdc8b	0.307478	0.0163402	0.0269409	0.999998	TRUE
Lamb2	0.560341	2.55176e-11	0.00754839	0.999998	TRUE
Usp19	0.346401	0.000338121	-0.0797235	0.999998	TRUE
Qrich1	0.205311	0.0153736	-0.0505957	0.999998	TRUE
Arih2	0.252769	0.00466243	0.00697474	0.999998	TRUE
Ip6k2	0.269213	0.00639902	0.00682942	0.999998	TRUE
Celsr3	1.48926	0.00608378	-0.485494	0.999998	FALSE
Slc26a6	0.408973	0.0308232	0.00277537	0.999998	TRUE
Spink8	5.42443	2.18494e-05	2.35146	0.999998	FALSE
Cdc25a	0.276881	0.0067274	-0.0277457	0.999998	TRUE
Map4	0.238704	0.00807601	-0.0310864	0.999998	TRUE
Dhx30	0.225891	0.0121601	0.00263567	0.999998	TRUE
Mir6236	0.176783	0.0571337	-0.0592154	0.999998	FALSE
Kif9	0.752394	0.00731443	-0.261228	0.999998	TRUE
Nbeal2	1.07681	5.195e-13	0.122577	0.999998	TRUE
Pth1r	0.54825	2.97271e-05	-0.0290687	0.999998	TRUE
Prss50	2.76443	2.28284e-06	-1.02443	0.999998	FALSE
Tmie	0.835211	4.50135e-06	0.0921348	0.999998	FALSE
Als2cl	0.339299	0.0424359	0.108323	0.999998	TRUE
Lrrc2	1.41688	0.0203727	-0.0354706	0.999998	FALSE
Trank1	0.426655	1.74922e-06	0.176658	0.999998	TRUE
Clasp2	0.390936	7.33057e-05	-0.0100719	0.999998	TRUE
Cnot10	0.186681	0.0460493	-0.0909368	0.999998	TRUE
Cmtm6	0.17669	0.0452784	0.0702302	0.999998	TRUE
Zcwpw2	1.20442	0.0014409	-0.306843	0.999998	FALSE
Golga4	0.373397	0.00151274	-0.0751593	0.999998	TRUE
Ctdspl	0.198648	0.0505422	0.0101798	0.999998	TRUE
Vill	0.387001	0.0184034	-0.118889	0.999998	FALSE
Plcd1	0.609541	9.18884e-10	-0.0389783	0.999998	TRUE
Acvr2b	0.268235	0.0946365	-0.192219	0.999998	TRUE
Scn5a	0.42299	0.0041129	-0.113008	0.999998	TRUE
Scn10a	0.761603	0.0914495	0.174193	0.999998	FALSE
Ttc21a	1.15848	0.0596119	-0.24755	0.999998	FALSE
Csrnp1	0.383162	0.0133599	-0.0505236	0.999998	TRUE
Nktr	0.58708	2.76809e-07	0.0186649	0.999998	TRUE
E530011L22Rik	0.308234	0.0533279	-0.0107314	0.999998	TRUE
Higd1a	0.334662	0.00771725	0.00515765	0.999998	TRUE
RP24-93F20.9	1.83808	0.000102478	-0.322083	0.999998	FALSE
1700048O20Rik	0.570983	0.00135734	-0.150657	0.999998	FALSE
Tcaim	0.569716	2.29328e-05	-0.1768	0.999998	TRUE
Plekhg1	0.383995	5.29864e-05	0.0526479	0.999998	TRUE
Akap12	0.49662	1.04421e-08	-0.113594	0.999998	TRUE
Gm21781	0.759756	0.0079571	-0.0800714	0.999998	FALSE
Rmnd1	0.300553	0.0150568	0.0316248	0.999998	TRUE
Ccdc170	0.953837	9.12067e-06	0.0181442	0.999998	FALSE
Rgs17	0.498565	6.70354e-05	0.223123	0.999998	TRUE
Cnksr3	0.18103	0.0932613	-0.0277976	0.999998	TRUE
Ppil4	0.280339	0.00431287	-0.0787602	0.999998	TRUE
Stxbp5	0.600453	2.8485e-08	-0.141641	0.999998	TRUE
Gm15568	0.827763	0.0345339	0.268789	0.999998	FALSE
Ltv1	0.313172	0.00164309	-0.0455267	0.999998	TRUE
Aig1	0.360543	0.023315	0.152043	0.999998	FALSE
Adgrg6	0.892188	0.0082771	-0.154579	0.999998	FALSE
Txlnb	0.775995	0.000417117	0.0784143	0.999998	FALSE
Reps1	0.487887	1.1684e-06	-0.100117	0.999998	TRUE
Ccdc28a	0.345464	0.0458323	-0.0737451	0.999998	TRUE
Perp	0.705443	0.0726805	-0.197753	0.999998	FALSE
Map7	0.308905	0.000963144	0.058945	0.999998	TRUE
RP23-158C15.6	0.324628	0.0489796	0.00394441	0.999998	FALSE
Sgk1	0.642163	2.10496e-07	-0.0821207	0.999998	TRUE
Slc2a12	1.15299	1.19685e-13	0.0250222	0.999998	TRUE
Hint3	0.293876	0.0630589	-0.0332868	0.999998	TRUE
Tpd52l1	0.527881	4.05256e-06	0.118436	0.999998	TRUE
Slc16a10	0.395697	0.00403086	-0.169148	0.999998	TRUE
Fig4	0.340567	0.00047186	0.0785596	0.999998	TRUE
Ostm1	0.211172	0.0944644	0.0178591	0.999998	TRUE
RP23-240G3.2	0.638125	0.0953207	0.0670595	0.999998	FALSE
Qrsl1	0.334217	0.0251377	-0.136626	0.999998	TRUE
Rtn4ip1	0.335905	0.0454566	-0.120266	0.999998	TRUE
Aim1	0.481444	0.0141261	-0.284281	0.999998	TRUE
Lin28b	0.741746	4.20931e-07	-0.497533	0.783192	TRUE
Hace1	0.213066	0.064518	-0.112542	0.999998	TRUE
Ascc3	0.417202	6.46296e-06	-0.0693628	0.999998	TRUE
Zfa-ps	0.260388	0.0470085	0.0233298	0.999998	FALSE
Sh3rf3	0.68247	0.0417645	-0.247056	0.999998	FALSE
Micu1	0.236006	0.0379722	0.0730017	0.999998	TRUE
Psap	0.199183	0.00781798	-0.00943701	0.999998	TRUE
Vsir	0.487917	0.00758676	-0.254875	0.999998	FALSE
Sgpl1	0.165651	0.0991926	-0.0382776	0.999998	TRUE
2010107G23Rik	0.360998	0.0633257	-0.222025	0.999998	TRUE
Supv3l1	0.226116	0.0626425	-0.0560648	0.999998	TRUE
Pbld2	1.09425	0.00469078	-0.0903192	0.999998	FALSE
Herc4	0.29339	0.000425103	0.0436636	0.999998	TRUE
Sirt1	0.238494	0.0121888	-0.123735	0.999998	TRUE
1700040L02Rik	0.445817	0.0340762	0.196856	0.999998	TRUE
Rhobtb1	0.36388	0.00025881	0.0550775	0.999998	TRUE
Ank3	0.622364	6.51414e-09	-0.0929507	0.999998	TRUE
Phyhipl	1.34721	9.28312e-18	-0.281485	0.999998	FALSE
Cabin1	0.208395	0.0352465	-0.0598811	0.999998	TRUE
Derl3	0.640174	0.000200575	-0.0592494	0.999998	TRUE
Zfp280b	0.359381	0.000296804	0.00506188	0.999998	TRUE
Pcbp3	0.30013	0.0364516	-0.00848463	0.999998	TRUE
Col18a1	0.239056	0.00949217	0.0927168	0.999998	TRUE
Adarb1	0.701197	1.27105e-10	-0.27667	0.999998	TRUE
Ube2g2	0.260261	0.00689204	-0.00894343	0.999998	TRUE
Dnmt3l	0.978107	0.0506262	-0.597235	0.999998	FALSE
Trappc10	0.211149	0.0369646	0.0188108	0.999998	TRUE
C2cd4c	0.998677	2.81738e-09	0.00491012	0.999998	TRUE
Shc2	0.644057	5.09405e-14	0.0987405	0.999998	TRUE
Cdc34	0.25636	0.03627	-0.192351	0.999998	FALSE
Hcn2	0.552482	0.0153308	-0.280535	0.999998	FALSE
Polrmt	0.388744	0.000220891	-0.10611	0.999998	TRUE
Fstl3	0.295757	0.00542651	-0.0335133	0.999998	TRUE
Prss57	0.295416	0.00936936	-0.00114162	0.999998	FALSE
Prtn3	0.773336	0.090659	-0.228864	0.999998	FALSE
Abca7	0.34146	0.0667597	0.17455	0.999998	FALSE
Sbno2	0.434906	2.30971e-05	-0.0254113	0.999998	TRUE
Cirbp	0.180893	0.0607442	-0.114551	0.999998	TRUE
Mum1	0.231952	0.0367442	-0.0779996	0.999998	TRUE
Gamt	0.323334	0.00270988	0.0904977	0.999998	TRUE
Reep6	0.487318	0.00585191	-0.125615	0.999998	TRUE
Plk5	1.01935	0.000600258	-0.57741	0.999998	FALSE
Mex3d	0.285444	0.0136463	-0.140767	0.999998	TRUE
Mknk2	0.435118	1.22273e-05	-0.1676	0.999998	TRUE
Ap3d1	0.279823	0.00219117	-0.0265353	0.999998	TRUE
Dot1l	0.409017	3.07581e-05	-0.0491334	0.999998	TRUE
Gadd45b	0.321192	0.0716969	-0.107448	0.999998	TRUE
Gng7	0.354927	0.0510851	-0.0291163	0.999998	TRUE
Thop1	0.20361	0.0933711	-0.164782	0.999998	TRUE
Pias4	0.32606	0.00366544	-0.0970041	0.999998	TRUE
Tjp3	1.13002	5.32043e-05	-0.378874	0.999998	FALSE
Gipc3	0.923546	4.35826e-05	0.103184	0.999998	FALSE
Hmg20b	0.265819	0.0766452	-0.00674862	0.999998	TRUE
Celf5	1.57442	0.000853736	-0.113161	0.999998	FALSE
Tle2	0.359691	0.0709221	0.198131	0.999998	TRUE
Hcfc2	0.519353	1.01497e-06	-0.234345	0.999998	TRUE
Gm4799	0.259507	0.059223	-0.116788	0.999998	FALSE
Slc41a2	0.706478	2.00143e-06	-0.104979	0.999998	TRUE
Fhl4	0.602278	0.0468486	-0.0432631	0.999998	FALSE
Cry1	0.324167	0.00361194	-0.107878	0.999998	TRUE
Prdm4	0.227191	0.0144027	-0.136492	0.999998	FALSE
Fbxo7	0.466376	4.16395e-05	-0.0988153	0.999998	TRUE
Gm25745	0.484844	0.0199234	-0.0452793	0.999998	FALSE
Nt5dc3	0.243484	0.0677086	0.0595585	0.999998	TRUE
Gm16280	0.39625	0.0517081	-0.344661	0.999998	FALSE
Gm16270	0.448482	5.13141e-06	-0.239811	0.999998	FALSE
Gnptab	0.318811	0.000413764	0.0316415	0.999998	TRUE
Chpt1	0.329832	5.70571e-05	-0.0573152	0.999998	TRUE
Sycp3	1.0923	1.40319e-22	-0.360313	0.9441	TRUE
Mybpc1	2.23407	3.0342e-09	0.213163	0.999998	FALSE
Ano4	0.445235	0.0126892	0.07298	0.999998	FALSE
Cdk17	0.239649	0.0407372	-0.0801829	0.999998	TRUE
Ntn4	0.688277	1.3269e-12	-0.0861582	0.999998	TRUE
Fgd6	0.708312	3.16333e-15	-0.176714	0.999998	TRUE
Cep83	0.615613	4.00011e-10	-0.182023	0.999998	TRUE
Epyc	1.30854	0.000128435	0.535643	0.999998	FALSE
Tmtc2	0.257855	0.0345277	0.0925061	0.999998	TRUE
Ppp1r12a	0.29637	0.000809305	-0.0929309	0.999998	TRUE
Nav3	0.670566	0.025017	-0.0140615	0.999998	TRUE
Osbpl8	0.34856	0.000176533	-0.0796231	0.999998	TRUE
Glipr1l2	1.30316	0.0951311	-0.0430269	0.999998	FALSE
Zfc3h1	0.295744	0.0190113	0.0350481	0.999998	TRUE
4933416C03Rik	1.02492	4.9768e-09	-0.624119	0.425691	TRUE
Cpm	0.718294	0.00501381	-0.0618005	0.999998	FALSE
Grip1	0.338049	0.074746	0.229799	0.999998	FALSE
Tmbim4	0.240984	0.0766431	0.137551	0.999998	TRUE
Lemd3	0.204952	0.065729	0.0158549	0.999998	TRUE
Tbk1	0.419138	4.77952e-05	0.00133194	0.999998	TRUE
Mon2	0.217289	0.0596427	0.0397507	0.999998	TRUE
Usp15	0.332463	0.000343721	-0.024374	0.999998	TRUE
Tsfm	0.261691	0.0548232	0.13099	0.999998	TRUE
B4galnt1	3.23269	1.01336e-15	0.0395098	0.999998	TRUE
Pip4k2c	0.238108	0.0127433	-0.0526348	0.999998	TRUE
Kif5a	0.694869	3.26433e-05	-0.252368	0.999998	TRUE
Mbd6	0.324187	0.0016089	-0.0432266	0.999998	TRUE
Baz2a	0.400731	8.82587e-05	-0.0855457	0.999998	TRUE
Cs	0.188642	0.0473609	-0.0759462	0.999998	TRUE
Coq10a	0.381165	0.0363442	0.091246	0.999998	FALSE
Myl6b	0.437	0.00506074	-0.102371	0.999998	FALSE
Erbb3	0.448994	0.000163518	-0.0767714	0.999998	TRUE
Suox	0.338914	0.0259878	-0.0186784	0.999998	TRUE
Cdk2	0.157737	0.0972626	0.039367	0.999998	TRUE
Dgka	0.395236	0.0196326	0.0269515	0.999998	TRUE
Pisd-ps1	0.509806	7.7354e-05	-0.166141	0.999998	TRUE
Sfi1	0.319737	0.0345023	0.0669581	0.999998	TRUE
Eif4enif1	0.202813	0.0206167	-0.0375378	0.999998	TRUE
Limk2	0.216687	0.0659341	-0.00245039	0.999998	TRUE
Rnf185	0.312613	0.000266794	0.0415612	0.999998	TRUE
Inpp5j	1.21576	0.0114549	0.122799	0.999998	FALSE
Gm11949	0.347199	0.0323324	-0.122573	0.999998	FALSE
Morc2a	0.317075	0.00058227	-0.0762897	0.999998	TRUE
Osbp2	1.14066	1.20296e-06	-0.4935	0.999998	FALSE
4921536K21Rik	0.988396	0.0586188	-0.143092	0.999998	FALSE
Slc35e4	0.592165	0.074065	-0.00576519	0.999998	FALSE
Tcn2	0.288545	0.00977788	0.0625356	0.999998	TRUE
Gal3st1	2.67199	4.33938e-18	-1.44668	0.999998	FALSE
Sec14l2	0.657867	0.000526899	0.0247866	0.999998	FALSE
Tbc1d10a	0.263714	0.01886	0.0104808	0.999998	TRUE
Hormad2	1.36529	2.20195e-13	-0.45843	0.999998	TRUE
Mtmr3	0.342503	6.04844e-05	-0.0920831	0.999998	TRUE
Ascc2	0.241556	0.0115492	0.0241241	0.999998	TRUE
Nf2	0.23381	0.00450033	0.0138201	0.999998	TRUE
Thoc5	0.330183	0.000578535	-0.0115822	0.999998	TRUE
Nefh	0.415014	0.0362829	-0.357202	0.999998	TRUE
Ap1b1	0.288016	0.000453488	-0.0699136	0.999998	TRUE
Gas2l1	1.19846	8.58652e-06	-0.0780002	0.999998	TRUE
Rasl10a	2.14951	5.66714e-36	-0.0912661	0.999998	TRUE
Kremen1	0.410679	0.000103912	0.0435437	0.999998	TRUE
Ykt6	0.292836	0.000470026	0.00534222	0.999998	TRUE
Camk2b	0.538518	0.0278062	-0.147857	0.999998	TRUE
Ogdh	0.233121	0.0103653	0.0538022	0.999998	TRUE
Adcy1	0.394823	0.0619649	-0.272933	0.999998	TRUE
Gm11992	0.721975	0.0855269	0.147065	0.999998	FALSE
Upp1	0.628725	0.00905368	-0.0467034	0.999998	TRUE
Zpbp	0.648738	0.00844274	0.0303649	0.999998	FALSE
Ikzf1	0.454339	0.0516414	-0.290107	0.999998	FALSE
Gm12031	0.960586	0.00320112	-0.0545483	0.999998	FALSE
Slc1a4	0.252757	0.0946941	0.0827996	0.999998	TRUE
Aftph	0.265165	0.00341231	-0.0292469	0.999998	TRUE
Peli1	0.20327	0.0605509	-0.00401894	0.999998	TRUE
Gm12041	1.5874	0.00132557	-0.193939	0.999998	FALSE
Fam161a	0.574614	0.061434	0.12731	0.999998	FALSE
Usp34	0.199696	0.0511876	-0.0551625	0.999998	TRUE
Pus10	0.228933	0.0529314	-0.00868578	0.999998	TRUE
Rel	0.842987	1.77851e-15	-0.116823	0.999998	TRUE
Papolg	0.556129	1.61964e-09	-0.0836371	0.999998	TRUE
Eml6	0.395459	0.0883554	-0.113231	0.999998	TRUE
Psme4	0.217655	0.0374808	0.0192443	0.999998	TRUE
Cpeb4	0.566059	4.46897e-08	-0.0636246	0.999998	TRUE
4930524B15Rik	1.94691	3.43106e-09	-0.354801	0.999998	FALSE
Snrnp25	0.255376	0.0914235	0.00539543	0.999998	TRUE
4930469K13Rik	1.51318	0.0413707	0.45873	0.999998	FALSE
Gm12138	0.324511	0.00479487	-0.0027195	0.999998	FALSE
Ublcp1	0.173462	0.0719923	0.0199815	0.999998	TRUE
Sox30	1.09191	5.98017e-05	-0.121826	0.999998	TRUE
Gm12166	0.41647	0.00369275	0.0174016	0.999998	FALSE
Trim41	0.179931	0.0613932	-0.0843333	0.999998	TRUE
Trim7	0.647702	2.82307e-10	-0.0461649	0.999998	TRUE
Gm16170	1.07249	8.84273e-09	0.0351869	0.999998	FALSE
Mapk9	0.37801	4.30739e-06	0.0574948	0.999998	TRUE
BC049762	1.44648	1.79818e-05	-0.245519	0.999998	FALSE
Clk4	0.260864	0.0765159	0.053815	0.999998	TRUE
Sec24a	0.384468	0.000448396	0.0321613	0.999998	TRUE
Kif3a	0.255445	0.0278704	-0.154191	0.999998	TRUE
Slc22a5	0.445569	0.00133265	0.0166166	0.999998	TRUE
Slc22a21	0.567535	7.5047e-05	-0.0333779	0.999998	TRUE
Slc22a4	0.793235	0.00121357	0.0354677	0.999998	TRUE
Acsl6	2.67389	5.4625e-08	-0.0748461	0.999998	FALSE
Gm12224	2.75794	1.11198e-09	0.121076	0.999998	FALSE
Meikin	1.75469	0.0666342	-0.843448	0.999998	FALSE
Fnip1	0.702758	6.13819e-15	-0.0445461	0.999998	TRUE
Rapgef6	0.227205	0.00987035	-0.172756	0.999998	TRUE
Ccdc69	0.849282	5.94449e-05	0.112782	0.999998	TRUE
Gm2a	0.747907	2.04003e-15	0.0843166	0.999998	TRUE
Gm12231	0.20504	0.0476513	-0.125008	0.999998	FALSE
Atox1	0.280619	0.0302692	0.024603	0.999998	FALSE
Mfap3	0.390118	6.38855e-06	0.110493	0.999998	TRUE
Gemin5	0.342751	0.000153829	-0.176018	0.999998	TRUE
Zfp672	0.74869	1.17105e-09	-0.0600188	0.999998	TRUE
Sh3bp5l	0.174008	0.0915334	-0.0126778	0.999998	FALSE
Zfp39	0.525742	4.73929e-06	-0.0984143	0.999998	TRUE
Gm12256	0.601533	0.00383904	-0.0384526	0.999998	FALSE
Btnl10	2.69795	1.01736e-05	0.0427008	0.999998	FALSE
Rnf187	0.278031	0.00808021	0.0209645	0.999998	TRUE
Trim17	0.291716	0.0887157	-0.1192	0.999998	FALSE
Gm12260	1.31076	0.0745059	-0.639555	0.999998	FALSE
Obscn	1.48733	2.25263e-06	0.344664	0.999998	FALSE
Guk1	0.385547	0.00119046	-0.0147909	0.999998	TRUE
Mrpl55	0.277605	0.029011	-0.0250594	0.999998	FALSE
2310033P09Rik	0.281799	0.0604768	0.0550375	0.999998	TRUE
Prss38	1.38921	0.0375547	0.325493	0.999998	FALSE
Snap47	0.244239	0.0120121	-0.0444221	0.999998	TRUE
Gm12263	0.287547	0.0300049	-0.0854838	0.999998	FALSE
Gm16062	0.211835	0.0876335	-0.00662723	0.999998	FALSE
[truncated: 5,250 more rows]
