# Supplementary material for: ketu mutant mice uncover an essential meiotic function for the ancient RNA helicase YTHDC2
Source: eLife. 2018 Jan 23;7:e30919. doi: 10.7554/eLife.30919 (PMC5832417; doi:10.7554/eLife.30919)
Supplement: Supplementary file 1. [file elife-30919-supp1.xlsx]

## Sheet: Sheet1
Supplementary File 1. Expression fold changes of differentially expressed genes in Figure 6B.
				Mut 8d vs WT/Het 8d		Mut 9d vs WT/Het 9d		Mut 10d vs WT/Het 10d		Mut 8d+9d vs WT/Het 8d+9d		Mut 9d+10d vs WT/Het 9d+10d		Mut 8d+9d+10d vs WT/Het 8d+9d+10d
Position within heat map (top to bottom)	Cluster	ENSEMBL Gene ID	Gene name	Log2 fold change	padj	Log2 fold change	padj	Log2 fold change	padj	Log2 fold change	padj	Log2 fold change	padj	Log2 fold change	padj
1	I	ENSMUSG00000027750	Postn	-0.140351	0.999998	0.211641	0.999985	0.576423	0.0205999	0.00448408	0.999997	0.345355	0.999981	0.114462	0.999988
2	I	ENSMUSG00000042834	Nrep	0.410764	0.0363983	0.0704094	0.999985	0.316614	0.110931	0.262959	0.999997	0.16561	0.999981	0.27532	0.999988
3	I	ENSMUSG00000019647	Sema6a	0.790199	0.0097887	0.511989	0.779697	0.38326	0.999985	0.680457	0.999997	0.466698	0.232102	0.628455	0.999988
4	I	ENSMUSG00000039954	Stk32a	1.5769	3.3147e-07	0.873183	0.999985	0.362606	0.999985	1.26054	0.0410924	0.688106	0.999981	1.07594	0.156404
5	I	ENSMUSG00000045629	Sh3tc2	0.415257	6.35134e-06	0.267512	0.999985	0.251414	0.977486	0.340923	0.138297	0.263827	0.999981	0.322296	0.187055
6	I	ENSMUSG00000086782	E130102H24Rik	0.99134	0.999998	1.34158	0.690831	1.0871	0.999985	1.15913	0.000898724	1.23834	0.00325787	1.14238	5.3477e-07
7	I	ENSMUSG00000030157	Clec2d	0.942007	4.73175e-06	0.966781	0.000109265	0.436415	0.999985	0.951467	1.65805e-13	0.765021	0.000421509	0.829026	2.05388e-11
8	I	ENSMUSG00000000420	Galnt1	0.190617	0.999998	0.151804	0.999985	0.183694	0.692698	0.16881	0.421273	0.166902	0.0269313	0.174038	0.0382298
9	I	ENSMUSG00000024378	Stard4	0.392043	0.9441	0.304765	0.999985	0.422766	0.00758501	0.34575	0.999997	0.355838	0.416844	0.367359	0.187055
10	I	ENSMUSG00000053644	Aldh7a1	0.30276	0.122368	0.334541	0.999985	0.347361	0.156174	0.316005	0.109102	0.34211	0.232934	0.325651	0.00684191
11	I	ENSMUSG00000032656	March3	0.770963	3.66054e-07	0.744229	0.0337676	0.532732	0.0833987	0.75442	1.74572e-06	0.659312	0.0110175	0.698256	2.25781e-07
12	I	ENSMUSG00000043079	Synpo	0.746593	3.11719e-15	0.668985	0.0186005	0.703767	0.999985	0.704831	2.25206e-07	0.6851	0.00345323	0.706128	1.51361e-08
13	I	ENSMUSG00000036452	Arhgap26	0.671782	4.96664e-16	0.306998	0.999985	0.190786	0.999985	0.486619	7.66861e-06	0.259549	0.837964	0.408018	0.00130531
14	I	ENSMUSG00000085289	Gm15337	0.809581	0.0960525	0.229187	0.999985	0.280171	0.999985	0.493944	0.147074	0.255532	0.999981	0.438044	0.0488834
15	I	ENSMUSG00000024575	Pde6a	1.75266	0.20161	1.03593	0.999985	0.554034	0.999985	1.31272	0.0127024	0.805412	0.837964	1.04083	0.230585
16	I	ENSMUSG00000024610	Cd74	0.962331	0.0001254	0.543308	0.528005	0.585941	0.999985	0.710959	0.138297	0.563625	0.552866	0.672489	0.581803
17	I	ENSMUSG00000041062	Mslnl	0.442566	0.999998	0.864479	0.999985	1.05914	0.999985	0.676185	0.999997	0.946264	0.0269313	0.790638	0.0989417
18	I	ENSMUSG00000098488	Pla2g4b	0.359957	0.999998	0.647684	0.0260972	0.186949	0.999985	0.514756	0.109102	0.458979	0.0393568	0.425082	0.202165
19	I	ENSMUSG00000019179	Mdh2	-0.0239015	0.999998	0.158414	0.999985	0.244055	0.0615574	0.0667489	0.999997	0.194546	0.0269313	0.112573	0.999988
20	I	ENSMUSG00000029675	Eln	-0.0263017	0.999998	0.339019	0.00507944	0.178497	0.84071	0.17135	0.999997	0.273505	0.065285	0.175255	0.999988
21	I	ENSMUSG00000061462	Obscn	0.344664	0.999998	1.01183	0.0104173	0.212031	0.999985	0.774598	0.999997	0.624274	0.925307	0.56255	0.999988
22	I	ENSMUSG00000038128	Camk4	-0.0123464	0.999998	0.566398	0.709698	0.623224	0.0209887	0.324558	0.999997	0.594304	0.0725351	0.421323	0.999988
23	I	ENSMUSG00000002799	Jag2	-0.386276	0.999998	0.359662	0.999985	0.356543	0.0301259	0.101369	0.999997	0.360659	0.999981	0.210396	0.999988
24	I	ENSMUSG00000059895	Ptp4a3	-0.109819	0.999998	0.201713	0.999985	0.341191	0.0261879	0.0562076	0.999997	0.265054	0.751313	0.141653	0.999988
25	I	ENSMUSG00000076281	Gm24270	-0.335886	0.999998	-0.551788	0.528005	0.489333	0.037026	-0.439504	0.999997	-0.0799712	0.999981	-0.180425	0.999988
26	I	ENSMUSG00000076258	Gm23935	-0.384631	0.999998	-0.528665	0.497472	0.466257	0.0100615	-0.453233	0.999997	-0.0769781	0.999981	-0.200681	0.999988
27	I	ENSMUSG00000055148	Klf2	-0.0320423	0.999998	0.0683391	0.999985	0.739104	0.000837192	0.0173684	0.999997	0.354448	0.999981	0.220844	0.999988
28	I	ENSMUSG00000042444	Fam63b	0.0670981	0.999998	0.0745651	0.999985	0.474911	0.00105527	0.067879	0.999997	0.257306	0.999981	0.189663	0.999988
29	I	ENSMUSG00000038502	Ptov1	0.166489	0.999998	0.0162096	0.999985	0.332388	0.0379438	0.0870274	0.999997	0.138514	0.999981	0.146765	0.999988
30	I	ENSMUSG00000035885	Cox8a	0.0545868	0.999998	0.0731067	0.999985	0.340329	0.00596652	0.0610686	0.999997	0.183208	0.999981	0.133723	0.999988
31	II	ENSMUSG00000038718	Pbx3	-0.0329816	0.999998	-0.511518	0.374555	-0.676395	9.53359e-05	-0.262068	0.999997	-0.587746	0.126578	-0.38271	0.999988
32	II	ENSMUSG00000022829	Stxbp5l	0.311033	0.999998	-0.437333	0.999985	-1.18993	0.037487	-0.125831	0.999997	-0.804998	0.515581	-0.503708	0.999988
33	II	ENSMUSG00000086022	Rad51ap2	-0.477685	0.999998	-1.42613	0.0980183	-2.68538	1.99493e-22	-1.03447	0.382071	-2.13969	0.0255039	-1.74724	0.0771333
34	II	ENSMUSG00000000440	Pparg	-0.491736	0.999998	-0.757635	0.999985	-1.33127	7.88555e-05	-0.649394	0.999997	-1.05187	0.0973958	-0.906964	0.418657
35	II	ENSMUSG00000022113	Trim52	-0.53939	0.999998	-0.337002	0.999985	-1.01764	2.46093e-05	-0.433303	0.999997	-0.676458	0.775451	-0.637076	0.999988
36	II	ENSMUSG00000024878	Cbwd1	-0.0815719	0.999998	-0.211961	0.999985	-0.447212	0.00399089	-0.150223	0.999997	-0.311406	0.42389	-0.230809	0.999988
37	II	ENSMUSG00000005883	Spo11	-0.887066	0.999998	-0.816792	0.999985	-1.96836	0.00880208	-0.848829	0.999997	-1.39395	0.232934	-1.29725	0.75868
38	II	ENSMUSG00000069825	Spata22	-0.739649	0.999998	-0.785768	0.999985	-1.71766	5.13584e-07	-0.774591	0.999997	-1.25989	0.0269313	-1.1532	0.587473
39	II	ENSMUSG00000070336	Fbxo47	-0.309567	0.999998	-0.389396	0.999985	-1.58854	2.71304e-14	-0.360373	0.999997	-0.996479	0.925307	-0.824209	0.999988
40	II	ENSMUSG00000074704	Rad21l	-0.293045	0.999998	-0.724024	0.999985	-1.37503	6.33432e-16	-0.548535	0.999997	-1.05077	0.507064	-0.854591	0.999988
41	II	ENSMUSG00000052525	Spdya	-0.185766	0.999998	-0.720381	0.999985	-1.00131	0.000837192	-0.487922	0.999997	-0.858125	0.292156	-0.671318	0.999988
42	II	ENSMUSG00000043410	Hfm1	-0.293695	0.999998	-0.427044	0.999985	-1.12747	1.31311e-09	-0.377359	0.999997	-0.806114	0.999981	-0.690113	0.999988
43	II	ENSMUSG00000052616	Terb1	-0.799516	0.999998	-0.629793	0.999985	-1.19569	2.83428e-05	-0.69415	0.999997	-0.944548	0.999981	-0.917508	0.999988
44	II	ENSMUSG00000085601	Gm4969	-1.03978	0.00418423	-1.45982	0.999985	-1.55241	1.19734e-27	-1.33342	0.999997	-1.5169	0.925307	-1.44979	0.999988
45	II	ENSMUSG00000051592	Ccnb3	-0.968037	0.0238164	-1.09686	0.0337676	-1.60049	6.94924e-20	-1.05899	0.999997	-1.35405	0.0565971	-1.28123	0.583912
46	II	ENSMUSG00000078796	Zfp541	-0.817929	0.9441	-0.625766	0.999985	-1.47852	1.03513e-14	-0.690941	0.999997	-1.09354	0.837964	-1.04789	0.999988
47	II	ENSMUSG00000007035	Msh5	-0.186822	0.999998	-0.534221	0.999985	-1.05215	2.51392e-05	-0.407984	0.999997	-0.806134	0.999981	-0.671991	0.999988
48	II	ENSMUSG00000086989	Gm16441	-0.442822	0.999998	-1.38461	0.999985	-1.99198	0.00804121	-1.12644	0.999997	-1.79468	0.999981	-1.6388	0.999988
49	II	ENSMUSG00000087325	Gm6038	-0.884408	0.999998	-1.56521	0.999985	-1.68735	0.00758501	-1.3648	0.999997	-1.65188	0.999981	-1.56355	0.999988
50	II	ENSMUSG00000024155	Meiob	-0.648682	0.999998	-1.50412	0.999985	-2.83105	2.99138e-14	-1.25558	0.999997	-2.35717	0.272524	-2.13034	0.692918
51	II	ENSMUSG00000024905	Mtl5	-0.188903	0.999998	-0.524798	0.999985	-1.16483	1.29544e-07	-0.388329	0.999997	-0.895541	0.999981	-0.733226	0.999988
52	II	ENSMUSG00000039683	Sdk1	-0.0256336	0.999998	-0.164222	0.999985	-0.57803	0.012412	-0.108086	0.999997	-0.386273	0.999981	-0.293096	0.999988
53	II	ENSMUSG00000030924	2610020H08Rik	-0.022262	0.999998	-0.0782412	0.999985	-0.590413	0.0072751	-0.0554466	0.999997	-0.310494	0.999981	-0.219098	0.999988
54	II	ENSMUSG00000027719	Adad1	-0.410331	0.999998	-0.214981	0.999985	-0.667009	0.000436484	-0.304059	0.999997	-0.412889	0.435609	-0.413699	0.999988
55	II	ENSMUSG00000032065	Tex12	-0.579097	0.9441	-0.17783	0.999985	-0.543234	0.0144061	-0.345643	0.999997	-0.348307	0.999981	-0.411706	0.999988
56	II	ENSMUSG00000027379	Bub1	-0.188394	0.999998	-0.158916	0.999985	-0.305279	0.037026	-0.176496	0.999997	-0.220811	0.999981	-0.211237	0.999988
57	II	ENSMUSG00000079350	Magea8	-0.544908	0.00775286	-0.268139	0.999985	-0.212245	0.999985	-0.399113	0.999997	-0.239293	0.999981	-0.337232	0.999988
58	II	ENSMUSG00000035395	Pet2	-0.493154	0.573667	-0.254372	0.999985	-0.667866	0.00596652	-0.363377	0.999997	-0.43478	0.925307	-0.454382	0.999988
59	II	ENSMUSG00000050197	Rhox13	-0.733251	0.0449385	0.0053669	0.999985	0.0624065	0.999985	-0.246862	0.999997	0.0370583	0.999981	-0.121804	0.999988
60	II	ENSMUSG00000054727	1700013H16Rik	-0.827628	0.0147125	-0.0419375	0.999985	-0.0402725	0.999985	-0.289645	0.999997	-0.0386084	0.999981	-0.176496	0.999988
61	II	ENSMUSG00000051977	Prdm9	-0.839955	0.00853502	-0.342431	0.999985	-0.988286	3.85984e-11	-0.506827	0.999997	-0.730116	0.999981	-0.747801	0.999988
62	II	ENSMUSG00000038598	AI481877	-0.512524	0.999998	-0.217628	0.999985	-0.657821	0.0085844	-0.315023	0.999997	-0.470951	0.999981	-0.478266	0.999988
63	II	ENSMUSG00000057054	Inca1	-0.426758	0.999998	-0.187348	0.999985	-0.690916	0.0166592	-0.285251	0.999997	-0.459017	0.999981	-0.452711	0.999988
64	II	ENSMUSG00000022837	Iqcb1	-0.118893	0.999998	-0.177321	0.999985	-0.362917	0.0352576	-0.15383	0.999997	-0.263473	0.999981	-0.221205	0.999988
65	II	ENSMUSG00000021187	Tc2n	-0.493702	0.999998	-0.346728	0.999985	-0.600581	0.0260316	-0.400096	0.999997	-0.478031	0.999981	-0.482511	0.999988
66	II	ENSMUSG00000060445	Sycp2	-0.499016	0.999998	-0.381929	0.999985	-0.904002	5.93935e-11	-0.426829	0.999997	-0.660983	0.999981	-0.628997	0.999988
67	II	ENSMUSG00000011349	Dmrtc2	-0.757452	0.999998	-0.583199	0.999985	-0.876353	0.0100615	-0.635468	0.999997	-0.750383	0.999981	-0.752606	0.999988
68	II	ENSMUSG00000109561	Ankrd31	-0.278921	0.999998	-0.0930175	0.999985	-0.422501	0.0471192	-0.172948	0.999997	-0.246309	0.999981	-0.256802	0.999988
69	II	ENSMUSG00000036928	Stag3	-0.469848	0.999998	-0.26037	0.999985	-0.438745	2.56481e-05	-0.350421	0.999997	-0.344594	0.999981	-0.379636	0.999988
70	II	ENSMUSG00000022432	Smc1b	-0.492685	0.192605	-0.223773	0.999985	-0.460252	9.75756e-07	-0.332919	0.999997	-0.339382	0.999981	-0.378536	0.999988
71	II	ENSMUSG00000047220	Ccdc36	-0.572865	0.447124	-0.20238	0.999985	-0.564764	0.00100068	-0.345959	0.999997	-0.380207	0.999981	-0.426812	0.999988
72	II	ENSMUSG00000034555	Tex16	-0.439278	0.966662	-0.240789	0.999985	-0.503603	0.000214057	-0.319997	0.999997	-0.374587	0.999981	-0.390701	0.999988
73	II	ENSMUSG00000027855	Sycp1	-0.478858	0.999998	-0.156983	0.999985	-0.364174	0.00219679	-0.283739	0.999997	-0.257614	0.999981	-0.311872	0.999988
74	II	ENSMUSG00000020059	Sycp3	-0.360313	0.9441	-0.126669	0.999985	-0.417657	0.00105527	-0.226837	0.999997	-0.269423	0.999981	-0.294626	0.999988
75	II	ENSMUSG00000032854	Ugt8a	-0.790649	0.0194936	-0.353359	0.999985	-0.530637	0.00933121	-0.489461	0.999997	-0.451291	0.999981	-0.50633	0.999988
76	II	ENSMUSG00000028109	Hormad1	-0.585313	0.205536	-0.334892	0.999985	-0.564723	0.00131362	-0.426447	0.999997	-0.456418	0.999981	-0.483376	0.999988
77	II	ENSMUSG00000083620	Gm15529	-0.542246	0.999998	-0.333811	0.999985	-0.644395	0.00107948	-0.409557	0.999997	-0.495802	0.999981	-0.506153	0.999988
78	III	ENSMUSG00000012350	Ehf	1.38606	0.999998	-0.0802132	N/A	-2.77031	0.0301259	0.670982	0.999997	-1.23571	0.999981	-0.279698	0.999988
79	III	ENSMUSG00000031881	Cdh16	1.61161	0.887044	0.568736	0.999985	-3.27428	2.51392e-05	1.1606	0.999997	-1.05261	0.999981	-0.00230465	0.999988
80	III	ENSMUSG00000000682	Cd52	0.357281	0.999998	0.111436	0.999985	-1.85006	3.68181e-09	0.237583	0.999997	-0.878704	0.999981	-0.456448	0.999988
81	III	ENSMUSG00000050074	Spink8	2.35146	0.999998	1.00541	0.999985	-3.97803	0.0348468	1.55766	0.999997	-2.27351	0.999981	-1.47342	0.999988
82	III	ENSMUSG00000039269	2300002M23Rik	2.79541	0.999998	0.759293	0.999985	-3.86532	1.0942e-06	1.6078	0.999997	-2.1955	0.999981	-1.222	0.999988
83	III	ENSMUSG00000025431	Crisp1	3.10343	0.999998	0.800638	0.999985	-3.92628	0.000428703	1.71233	0.999997	-2.2355	0.999981	-1.25072	0.999988
84	III	ENSMUSG00000018211	Wfdc15b	1.56771	0.999998	1.6111	N/A	-3.34194	9.75756e-07	1.58704	N/A	-1.70563	0.999981	-1.03261	0.999988
85	III	ENSMUSG00000006570	Defb2	3.20065	0.999998	1.2193	N/A	-3.85631	0.00804121	2.02796	N/A	-2.06597	0.999981	-1.08935	0.999988
86	III	ENSMUSG00000029086	Prom1	-0.0615607	0.999998	0.350778	0.999985	-1.25734	0.00192811	0.159871	0.999997	-0.369837	0.999981	-0.277451	0.999988
87	III	ENSMUSG00000040205	Cuzd1	1.09967	0.999998	0.530017	0.999985	-3.01318	3.38032e-10	0.747543	0.999997	-1.75614	0.999981	-1.26742	0.999988
88	III	ENSMUSG00000021081	Serpina1f	2.28618	0.757347	0.820921	0.999985	-3.26377	7.7541e-18	1.36738	0.999997	-1.90233	0.999981	-1.23546	0.999988
89	III	ENSMUSG00000032487	Ptgs2	1.08993	0.999998	0.378454	N/A	-3.27318	2.11172e-07	0.751307	0.999997	-1.94053	0.999981	-1.12975	0.999988
90	III	ENSMUSG00000029154	Cwh43	1.65721	0.999998	0.875709	N/A	-3.35393	4.54936e-06	1.23739	N/A	-2.05186	0.999981	-1.33539	0.999988
91	III	ENSMUSG00000050520	Cldn8	2.18402	0.999998	0.717067	N/A	-3.82755	0.0205999	1.35733	N/A	-1.84926	0.999981	-0.917154	0.999988
92	III	ENSMUSG00000074679	Defb28	2.18371	0.999998	0.445576	N/A	-3.36902	0.0375467	1.12185	N/A	-2.37935	0.999981	-0.242734	N/A
93	III	ENSMUSG00000058019	Ces5a	2.2141	0.999998	0.654184	N/A	-3.99111	1.04554e-08	1.02005	N/A	-2.3709	0.999981	-0.545639	0.999988
94	IV	ENSMUSG00000070729	Gm12966	-0.0429207	0.999998	0.0749012	0.999985	-0.344343	0.0401823	0.0140658	0.999997	-0.086987	0.999981	-0.0726854	0.999988
95	IV	ENSMUSG00000021134	Srsf5	-0.0509454	0.999998	0.0945301	0.999985	-0.37077	0.00119966	0.0199536	0.999997	-0.0855545	0.999981	-0.0747081	0.999988
96	IV	ENSMUSG00000043456	Zfp536	0.146173	0.999998	0.402129	0.999985	-1.13099	0.0227331	0.32014	0.999997	-0.370966	0.999981	-0.286798	0.999988
97	IV	ENSMUSG00000038056	Kmt2c	0.0344149	0.999998	0.0624955	0.999985	-0.300126	0.0246955	0.045486	0.999997	-0.0893788	0.999981	-0.0465318	0.999988
98	IV	ENSMUSG00000062296	Trank1	0.176658	0.999998	0.174468	0.999985	-0.314322	0.0260316	0.172511	0.999997	-0.022786	0.999981	0.0447601	0.999988
99	IV	ENSMUSG00000092035	Peg10	0.0646765	0.999998	-0.0385919	0.999985	-0.35165	0.0135759	0.0107659	0.999997	-0.159844	0.999981	-0.0759388	0.999988
100	IV	ENSMUSG00000063450	Syne2	0.0636434	0.999998	0.101048	0.999985	-0.30335	0.0114761	0.0785675	0.999997	-0.0464203	0.999981	-0.00378252	0.999988
101	IV	ENSMUSG00000069516	Lyz2	-0.130254	0.999998	-0.781557	8.53254e-05	-0.418856	0.999985	-0.482447	0.999997	-0.64816	0.0973958	-0.465892	0.999988
102	IV	ENSMUSG00000069515	Lyz1	-0.113483	0.999998	-0.876096	0.000288329	-0.404969	0.999985	-0.516646	0.999997	-0.70817	0.141125	-0.490473	0.999988
103	IV	ENSMUSG00000023868	Pde10a	-0.263681	0.999998	-1.17289	0.999985	-1.34799	0.00768765	-0.778066	0.999997	-1.25431	0.490863	-0.97204	0.999988
104	IV	ENSMUSG00000059482	2610301B20Rik	-0.0989611	0.999998	-0.294658	0.51869	-0.16397	0.999985	-0.200508	0.999997	-0.239837	0.0255039	-0.189631	0.187055
105	IV	ENSMUSG00000085492	Trmt61b	0.0654515	0.999998	-0.534048	0.999985	-0.626208	0.298481	-0.23954	0.999997	-0.569721	0.0425882	-0.335928	0.999988
106	IV	ENSMUSG00000074656	Eif2s2	0.00664418	0.999998	-0.164207	0.999985	-0.15824	0.999985	-0.0792984	0.999997	-0.158928	0.0135431	-0.0972156	0.999988
107	IV	ENSMUSG00000019832	Rab32	0.0593481	0.999998	-0.480606	0.999985	-0.49274	0.999985	-0.17909	0.999997	-0.482419	0.0307749	-0.244341	0.999988
108	IV	ENSMUSG00000023919	Cenpq	-0.0322911	0.999998	-0.254484	0.999985	-0.222059	0.999985	-0.13937	0.999997	-0.238268	0.00345323	-0.157606	0.999988
109	IV	ENSMUSG00000071856	Mcc	-1.19047	1.05508e-06	-0.795355	0.23777	-0.865049	0.284321	-1.00957	1.00339e-06	-0.819018	0.00546231	-0.97989	6.43856e-07
110	IV	ENSMUSG00000024481	Lvrn	-1.98722	1.18704e-27	-1.36724	2.3706e-07	-0.606485	0.766744	-1.72631	1.46607e-13	-1.10651	0.000498706	-1.52223	9.01368e-08
111	IV	ENSMUSG00000073607	Gm10548	-4.13343	0.0091913	-1.47915	0.999985	-3.58911	0.167873	-2.15024	0.0982602	-1.92179	0.232934	-2.37694	0.0023979
112	IV	ENSMUSG00000034653	Ythdc2	-2.50065	4.38969e-81	-2.51664	0.000109265	-2.42049	5.17121e-69	-2.51132	9.47782e-34	-2.47545	2.33385e-18	-2.48585	2.21813e-51
113	IV	ENSMUSG00000033022	Cdo1	-0.887132	4.96664e-16	-0.545916	0.00533233	-0.330024	0.308231	-0.713189	8.68867e-10	-0.453035	0.00546231	-0.607417	6.43856e-07
