# Supplementary material for: ketu mutant mice uncover an essential meiotic function for the ancient RNA helicase YTHDC2
Source: eLife. 2018 Jan 23;7:e30919. doi: 10.7554/eLife.30919 (PMC5832417; doi:10.7554/eLife.30919)
Supplement: Supplementary file 2. [file elife-30919-supp2.xlsx]

## Sheet: Sheet1
Supplementary File 2. Accession numbers for Figure 8A.
Species	Accession number (Swiss-Prot)	Entry name	Gene name
African swine fever virus	Q89443	H962L_ASFB7	Ba71V-072
Arabidopsis thaliana	Q8L840	RQL4A_ARATH	RECQL4A
Arabidopsis thaliana	Q9FT70	RQL4B_ARATH	RECQL4B
Arabidopsis thaliana	Q8W4M7	ERCC2_ARATH	XPD
Arabidopsis thaliana	Q8VY00	ESP3_ARATH	ESP3
Arabidopsis thaliana	Q38953	DEAH5_ARATH	At3g26560
Arabidopsis thaliana	Q0WVW7	RQL5_ARATH	RECQL5
Arabidopsis thaliana	F4IJV4	DEAH6_ARATH	MEE29
Arabidopsis thaliana	Q9FT74	RQL1_ARATH	RECQL1
Arabidopsis thaliana	F4JRJ6	DEAH9_ARATH	At4g18465
Arabidopsis thaliana	F4KGU4	DEAHC_ARATH	At5g10370
Arabidopsis thaliana	P0CE10	DEAHB_ARATH	At4g01020
Arabidopsis thaliana	Q9C813	DEAHD_ARATH	FAS4
Arabidopsis thaliana	F4JMJ3	DEAH8_ARATH	At4g16680
Arabidopsis thaliana	F4ILR7	DEXH1_ARATH	At2g35920
Ashbya gossypii	Q750G3	CHL1_ASHGO	CHL1
Aspergillus clavatus	A1CJ34	CHL1_ASPCL	chl1
Aspergillus nidulans	Q5ARK3	SWR1_EMENI	swr1
Bacillus subtilis	P50729	RECS_BACSU	recS
Bombyx mori	A9X4T1	CHD1_BOMMO	CHD1
Bos taurus	A6QLJ0	ERCC2_BOVIN	ERCC2
Bos taurus	Q28141	DHX9_BOVIN	DHX9
Bos taurus	Q17R09	PRP16_BOVIN	DHX38
Bos taurus	Q3B7N1	CHD1L_BOVIN	CHD1L
Botryotinia fuckeliana	A6RIS1	MPH1_BOTFB	mph1
Caenorhabditis briggsae	A8WS58	RTEL1_CAEBR	rtel-1
Caenorhabditis elegans	O18017	BLM_CAEEL	him-6
Caenorhabditis elegans	O45244	DHX16_CAEEL	mog-4
Caenorhabditis elegans	G5EBZ4	LE418_CAEEL	let-418
Caenorhabditis elegans	Q22516	CHD3_CAEEL	chd-3
Caenorhabditis elegans	Q09530	MOG5_CAEEL	mog-5
Caenorhabditis elegans	Q93575	RTEL1_CAEEL	rtel-1
Caenorhabditis elegans	Q22307	DHX9_CAEEL	rha-1
Caenorhabditis elegans	P34498	MOG1_CAEEL	mog-1
Caenorhabditis elegans	P34305	RHA2_CAEEL	rha-2
Caenorhabditis elegans	Q9BKQ8	DHX35_CAEEL	ddx-35
Candida albicans	Q5A1A0	MPH1_CANAL	MPH1
Candida albicans	Q5AD67	CHL1_CANAL	CHL1
Candida glabrata	Q6FKT4	CHL1_CANGA	CHL1
Coccidioides immitis	Q1E5T3	CHL1_COCIM	CHL1
Danio rerio	B8A4F4	TDRD9_DANRE	tdrd9
Danio rerio	P0C928	RTEL1_DANRE	rtel1
Debaryomyces hansenii	Q6BZD9	CHL1_DEBHA	CHL1
Dictyostelium discoideum	Q55G81	ERCC2_DICDI	repD
Dictyostelium discoideum	Q54F05	DHX8_DICDI	dhx8
Dictyostelium discoideum	Q54MH3	DHX16_DICDI	dhx16
Drosophila melanogaster	O97159	CHDM_DROME	Mi-2
Drosophila melanogaster	Q9VGI8	BLM_DROME	Blm
Drosophila melanogaster	P24785	MLE_DROME	mle
Drosophila melanogaster	Q7KU24	CHD1_DROME	Chd1
Drosophila melanogaster	O16102	CHD3_DROME	Chd3
Drosophila melanogaster	O46072	KZ_DROME	kz
Fowlpox virus	P21966	ETF1_FOWPN	VETFS
Gallus gallus	Q5ZI74	DHX30_CHICK	DHX30
Gibberella zeae	Q4IAK7	SWR1_GIBZE	SWR1
Haemophilus influenzae	P45018	HRPA_HAEIN	hrpA
Homo sapiens	Q9H2U1	DHX36_HUMAN	DHX36
Homo sapiens	O94762	RECQ5_HUMAN	RECQL5
Homo sapiens	Q12873	CHD3_HUMAN	CHD3
Homo sapiens	P18074	ERCC2_HUMAN	ERCC2
Homo sapiens	Q86WJ1	CHD1L_HUMAN	CHD1L
Homo sapiens	Q7L2E3	DHX30_HUMAN	DHX30
Homo sapiens	P54132	BLM_HUMAN	BLM
Homo sapiens	Q92620	PRP16_HUMAN	DHX38
Homo sapiens	Q8TDI0	CHD5_HUMAN	CHD5
Homo sapiens	Q14562	DHX8_HUMAN	DHX8
Homo sapiens	Q5T890	ER6L2_HUMAN	ERCC6L2
Homo sapiens	Q8TD26	CHD6_HUMAN	CHD6
Homo sapiens	O60231	DHX16_HUMAN	DHX16
Homo sapiens	Q9H6R0	DHX33_HUMAN	DHX33
Homo sapiens	Q6P158	DHX57_HUMAN	DHX57
Homo sapiens	Q7Z478	DHX29_HUMAN	DHX29
Homo sapiens	Q08211	DHX9_HUMAN	DHX9
Homo sapiens	Q9H5Z1	DHX35_HUMAN	DHX35
Homo sapiens	Q14839	CHD4_HUMAN	CHD4
Homo sapiens	Q8IX18	DHX40_HUMAN	DHX40
Homo sapiens	O43143	DHX15_HUMAN	DHX15
Homo sapiens	Q9UNY4	TTF2_HUMAN	TTF2
Invertebrate iridescent virus 3	Q196X3	VF022_IIV3	IIV3-087L
Kluyveromyces lactis	Q6CIF0	CHL1_KLULA	CHL1
Lodderomyces elongisporus	A5DUW8	CHL1_LODEL	CHL1
Magnaporthe oryzae	A4RHU9	DCL2_MAGO7	DCL2
Meyerozyma guilliermondii	A5DNW6	CHL1_PICGU	CHL1
Molluscum contagiosum virus subtype 1	Q98218	NPH2_MCV1	NPH2
Molluscum contagiosum virus subtype 1	Q98262	ETF1_MCV1	VETFS
Mus musculus	O88700	BLM_MOUSE	Blm
Mus musculus	A2A8L1	CHD5_MOUSE	Chd5
Mus musculus	O08811	ERCC2_MOUSE	Ercc2
Mus musculus	Q8VHK9	DHX36_MOUSE	Dhx36
Mus musculus	Q6PDQ2	CHD4_MOUSE	Chd4
Mus musculus	Q8VID5	RECQ5_MOUSE	Recql5
Mus musculus	O70133	DHX9_MOUSE	Dhx9
Mus musculus	Q99PU8	DHX30_MOUSE	Dhx30
Mus musculus	Q80VY9	DHX33_MOUSE	Dhx33
Mus musculus	A3KFM7	CHD6_MOUSE	Chd6
Mus musculus	Q9JIM3	ER6L2_MOUSE	Ercc6l2
Mus musculus	Q5NC05	TTF2_MOUSE	Ttf2
Mus musculus	A2A4P0	DHX8_MOUSE	Dhx8
Mus musculus	O35286	DHX15_MOUSE	Dhx15
Mus musculus	Q6PE54	DHX40_MOUSE	Dhx40
Mus musculus	Q6PGC1	DHX29_MOUSE	Dhx29
Myxoma virus	Q9Q8Q2	NPH2_MYXVL	NPH2
Myxoma virus	Q9Q8L9	ETF1_MYXVL	VETFS
Neosartorya fischeri	A1D8E4	CHL1_NEOFI	chl1
Neosartorya fumigata	Q4WAS9	SWR1_ASPFU	swr1
Neosartorya fumigata	Q4WWE9	CHL1_ASPFU	chl1
Neurospora crassa	Q7SCC1	DCL2_NEUCR	dcl-2
Neurospora crassa	Q7S133	SWR1_NEUCR	crf1-1
Pan troglodytes	Q7YR39	DHX16_PANTR	DHX16
Pongo abelii	Q5R874	DHX9_PONAB	DHX9
Pongo abelii	Q5R607	DHX30_PONAB	DHX30
Pongo abelii	Q5RAZ4	DHX15_PONAB	DHX15
Pongo abelii	Q5RBD4	DHX35_PONAB	DHX35
Pongo abelii	Q5R864	DHX40_PONAB	DHX40
Rabbit fibroma virus	Q9Q927	NPH2_RFVKA	NPH2
Rabbit fibroma virus	P32096	ETF1_RFVKA	VETFS
Rattus norvegicus	D4ACP5	RECQ5_RAT	Recql5
Rattus norvegicus	Q5BJS0	DHX30_RAT	Dhx30
Rattus norvegicus	D3ZA12	CHD6_RAT	Chd6
Rattus norvegicus	Q5XI69	DHX40_RAT	Dhx40
Saccharomyces cerevisiae	P35187	SGS1_YEAST	SGS1
Saccharomyces cerevisiae	P53131	PRP43_YEAST	PRP43
Saccharomyces cerevisiae	P06839	RAD3_YEAST	RAD3
Saccharomyces cerevisiae	P20095	PRP2_YEAST	PRP2
Saccharomyces cerevisiae	Q04217	DHR1_YEAST	ECM16
Saccharomyces cerevisiae	P22516	CHL1_YEAST	CHL1
Saccharomyces cerevisiae	P24384	PRP22_YEAST	PRP22
Saccharomyces cerevisiae	P36009	DHR2_YEAST	DHR2
Saccharomyces cerevisiae	P15938	PRP16_YEAST	PRP16
Saccharomyces cerevisiae	P38721	YHF0_YEAST	YHL050C
Scheffersomyces stipitis	A3GH78	MPH1_PICST	MPH1
Scheffersomyces stipitis	A3LN13	CHL1_PICST	CHL1
Schizosaccharomyces pombe	Q09811	HUS2_SCHPO	rqh1
Schizosaccharomyces pombe	Q9UT23	MPH1_SCHPO	fml1
Schizosaccharomyces pombe	O42643	PRP22_SCHPO	prp22
Schizosaccharomyces pombe	O42945	DHX15_SCHPO	prp43
Schizosaccharomyces pombe	Q10752	CDC28_SCHPO	cdc28
Schizosaccharomyces pombe	Q9P774	PRP16_SCHPO	prp16
Schizosaccharomyces pombe	Q03319	PRH1_SCHPO	prh1
Schizosaccharomyces pombe	Q9HDY4	YK16_SCHPO	SPAPB1A10.06c
Schizosaccharomyces pombe	Q9HE06	YK99_SCHPO	SPAC20H4.09
Schizosaccharomyces pombe	O94536	UCP12_SCHPO	ucp12
Sclerotinia sclerotiorum	A7ERG1	CHL1_SCLS1	CHL1
Sclerotinia sclerotiorum	A7EFH4	MPH1_SCLS1	mph1
Sus scrofa	Q767K6	DHX16_PIG	DHX16
Ustilago maydis	P0C7L7	YUM14_USTMA	UMAG_11114
Vaccinia virus	P12927	NPH2_VACCW	NPH2
Vaccinia virus	P04308	ETF1_VACCW	VETFS
Vanderwaltozyma polyspora	A7TTL0	CHL1_VANPO	CHL1
Variola virus	P33051	NPH2_VAR67	NPH2
Variola virus	P33056	ETF1_VAR67	VETFS
Xenopus laevis	Q9DEY9	BLM_XENLA	blm
Xenopus laevis	Q68FK8	DHX9_XENLA	dhx9
Xenopus laevis	A3KMI0	DHX29_XENLA	dhx29
Yaba monkey tumor virus	Q9QB97	ETF1_YMTV5	VETFS
Yarrowia lipolytica	Q6CAX3	CHL1_YARLI	CHL1
Yarrowia lipolytica	Q6CA87	SWR1_YARLI	SWR1
