# Supplementary material for: ketu mutant mice uncover an essential meiotic function for the ancient RNA helicase YTHDC2
Source: eLife. 2018 Jan 23;7:e30919. doi: 10.7554/eLife.30919 (PMC5832417; doi:10.7554/eLife.30919)
Supplement: Supplementary file 3. [file elife-30919-supp3.xlsx]

## Sheet: Sheet1
Supplementary File 3. Accession numbers for Figures 8B-D, 10 and 11.
Species	Genbank	GI	Protein_type	Common_name	Division
Acinonyx jubatus	XP_014922092.1	GI:961708765	Full YTHDC2	cheetah	carnivores
Acromyrmex echinatior	XP_011057121.1	GI:746853077	lacking YTH domain	Panamanian leafcutter ant	ants
Aedes albopictus	XP_019536306.1	GI:1121091415	lacking YTH domain	Asian tiger mosquito	mosquitos
Agrilus planipennis	XP_018318572.1	GI:1069786656	Full YTHDC2	emerald ash borer	beetles
Ailuropoda melanoleuca	XP_019660242.1	GI:1126277961	Full YTHDC2	giant panda	carnivores
Alligator mississippiensis	XP_006258990.1	GI:564229091	Full YTHDC2	American alligator	vertebrates
Alligator sinensis	XP_014376584.1	GI:944344569	Full YTHDC2	Chinese alligator	vertebrates
Alligator sinensis	XP_014372392.1	GI:944331533	MEIOC	Chinese alligator	vertebrates
Amazona aestiva	KQK84312.1	GI:944219129	Full YTHDC2	blue-fronted amazon	birds
Amyelois transitella	XP_013183775.1	GI:913306660	Full YTHDC2	navel orangeworm	moths
Ancylostoma ceylanicum	EYC07374.1	GI:597857944	Nematode type	hookworm of human and hamster	nematodes
Anolis carolinensis	XP_003223042.1	GI:327276569	Full YTHDC2	green anole	lizards
Anopheles sinensis	KFB39560.1	GI:668450249	lacking YTH domain		mosquitos
Anoplophora glabripennis	XP_018577132.1	GI:1080032856	Full YTHDC2	Asian longhorned beetle	beetles
Anser cygnoides domesticus	XP_013053077.1	GI:902929893	Full YTHDC2	domestic swan goose	birds
Aotus nancymaae	XP_012325511.1	GI:817309854	Full YTHDC2	Ma's night monkey	primates
Aptenodytes forsteri	XP_019328913.1	GI:1111009441	Full YTHDC2	emperor penguin	birds
Ascaris suum	ERG78837.1	GI:541038718	Nematode type	pig roundworm	nematodes
Austrofundulus limnaeus	XP_013858223.1	GI:928020307	Full YTHDC2		bony fishes
Bactrocera cucurbitae	XP_011183451.1	GI:751457640	Full YTHDC2	melon fly	flies
Bactrocera cucurbitae	XP_011179568.1	GI: 751450564	Bgcn-like	melon fly	flies
Bactrocera cucurbitae	XP_011183992.1	GI:751458631	Bam	melon fly	flies
Bactrocera dorsalis	XP_011204346.2	GI:1132385157	Bgcn-like	oriental fruit fly	flies
Bactrocera dorsalis	JAC51530.1	GI:618045928	Full YTHDC2	oriental fruit fly	flies
Bactrocera dorsalis	XP_011203771.1	GI:751788606	Bam	oriental fruit fly	flies
Bactrocera latifrons	XP_018788673.1	GI:1098646039	Bgcn-like	Solanum fruit fly	flies
Bactrocera latifrons	XP_018804889.1	GI:1098625618	Full YTHDC2	Solanum fruit fly	flies
Bactrocera latifrons	XP_018789774.1	GI:1098649444	Bam	Solanum fruit fly	flies
Bactrocera oleae	XP_014086043.1	GI:929353909	Full YTHDC2	olive fruit fly	flies
Bactrocera oleae	XP_014089511.1	GI:929360243	Bam	olive fruit fly	flies
Balaenoptera acutorostrata scammoni	XP_007192174.1	GI:594689578	Full YTHDC2	minke whale	whales & dolphins
Balearica regulorum gibbericeps	XP_010308785.1	GI:723577322	Full YTHDC2	East African grey crowned-crane	birds
Bemisia tabaci	XP_018900737.1	GI:1101349644	Full YTHDC2	sweet potato whitefly	whiteflies
Biomphalaria glabrata	XP_013089748.1	GI:908405735	Full YTHDC2	bloodfluke planorb	gastropods
Bombus terrestris	XP_003393250.1	GI:340709304	MEIOC	buff-tailed bumblebee	bees
Bombyx mori	XP_012544932.1	GI:827544601	Full YTHDC2	domestic silkworm	moths
Bos taurus	NP_001179740.1	GI:300796442	Full YTHDC2	cattle	even-toed ungulates
Brugia malayi	CTP80797.1	GI:1009344338	Nematode type	agent of lymphatic filariasis	nematodes
Bubalus bubalis	XP_006078326.1	GI:594110980	Full YTHDC2	water buffalo	even-toed ungulates
Buceros rhinoceros silvestris	XP_010136293.1	GI:704183466	Full YTHDC2	rhinoceros hornbill	birds
Caenorhabditis briggsae	XP_002642337.1	GI:268574716	MEIOC		nematodes
Caenorhabditis elegans	NP_492260.1	GI:17507503	Nematode type	roundworm	nematodes
Caenorhabditis remanei	XP_003110732.1	GI:308497090	MEIOC		nematodes
Callithrix jacchus	XP_002744748.1	GI:296193949	Full YTHDC2	white-tufted-ear marmoset	primates
Callorhinchus milii	XP_007895610.1	GI:632959422	Full YTHDC2	elephant shark	chimaeras
Calypte anna	XP_008502047.1	GI:663292137	Full YTHDC2	Anna's hummingbird	birds
Camelus bactrianus	XP_010970072.1	GI:743750537	Full YTHDC2	Bactrian camel	even-toed ungulates
Camelus dromedarius	XP_010985846.1	GI:744586961	Full YTHDC2	Arabian camel	even-toed ungulates
Camelus ferus	XP_014417815.1	GI:946661744	Full YTHDC2	Wild Bactrian camel	even-toed ungulates
Canis lupus familiaris	XP_005626411.1	GI:545516334	Full YTHDC2	dog	carnivores
Capitella teleta	ELT93867.1	GI:443692219	lacking YTH domain		segmented worms
Cariama cristata	XP_009703424.1	GI:698460761	Full YTHDC2	red-legged seriema	birds
Carlito syrichta	XP_008054850.1	GI:640797429	Full YTHDC2	Philippine tarsier	primates
Cavia porcellus	XP_003473320.1	GI:348575085	Full YTHDC2	domestic guinea pig	rodents
Cebus capucinus imitator	XP_017382660.1	GI:1044354170	Full YTHDC2	white-headed capuchin	primates
Ceratina calcarata	XP_017889909.1	GI:1061130596	lacking YTH domain	small carpenter bee	bees
Ceratitis capitata	XP_004517857.1	GI:498926247	Bgcn-like	Mediterranean fruit fly	flies
Ceratitis capitata	XP_004518807.1	GI:498930170	Full YTHDC2	Mediterranean fruit fly	flies
Ceratitis capitata	XP_012162125.1	GI:807043800	Bam	Mediterranean fruit fly	flies
Ceratosolen solmsi marchali	XP_011498496.1	GI:766932543	lacking YTH domain	fig wasp	wasps &c.
Ceratotherium simum simum	XP_004420361.1	GI:478491991	Full YTHDC2	southern white rhinoceros	odd-toed ungulates
Cercocebus atys	XP_011925869.1	GI:795314857	Full YTHDC2	sooty mangabey	primates
Charadrius vociferus	XP_009892112.1	GI:699705067	Full YTHDC2	killdeer	birds
Chelonia mydas	EMP39906.1	GI:465995909	Full YTHDC2	green sea turtle	turtles
Chinchilla lanigera	XP_005376572.1	GI:533122471	Full YTHDC2	long-tailed chinchilla	rodents
Chlorocebus sabaeus	XP_008012356.1	GI:635123091	Full YTHDC2	green monkey	primates
Chrysemys picta bellii	XP_008168208.1	GI:641766856	Full YTHDC2	western painted turtle	turtles
Chrysochloris asiatica	XP_006870601.1	GI:586480151	Full YTHDC2	Cape golden mole	placentals
Cimex lectularius	XP_014254889.1	GI:939269421	Full YTHDC2	bed bug	bugs
Clupea harengus	XP_012673936.1	GI:831285346	Full YTHDC2	Atlantic herring	bony fishes
Colius striatus	XP_010206339.1	GI:706149650	Full YTHDC2	speckled mousebird	birds
Colobus angolensis palliatus	XP_011819038.1	GI:795328465	Full YTHDC2	Angola colobus	primates
Columba livia	XP_005506269.1	GI:543730431	Full YTHDC2	rock pigeon	birds
Condylura cristata	XP_012583192.1	GI:830051677	Full YTHDC2	star-nosed mole	insectivores
Copidosoma floridanum	XP_014205434.1	GI:936582631	lacking YTH domain		wasps &c.
Corvus brachyrhynchos	XP_017583764.1	GI:1049385033	Full YTHDC2	American crow	birds
Corvus cornix cornix	XP_010399607.1	GI:727022667	Full YTHDC2	hooded crow	birds
Coturnix japonica	XP_015704894.1	GI:1004001427	Full YTHDC2	Japanese quail	birds
Crassostrea gigas	XP_011425711.1	GI:762086858	Full YTHDC2	Pacific oyster	bivalves
Crassostrea gigas	EKC33011.1	GI:405967892	MEIOC	Pacific oyster	bivalves
Cricetulus griseus	ERE81495.1	GI:537214768	Full YTHDC2	Chinese hamster	rodents
Crocodylus porosus	XP_019388033.1	GI:1121824325	Full YTHDC2	Australian saltwater crocodile	crocodiles
Cuculus canorus	XP_009560303.1	GI:696984000	Full YTHDC2	common cuckoo	birds
Culex quinquefasciatus	XP_001844850.1	GI:170033973	lacking YTH domain	southern house mosquito	mosquitos
Cynoglossus semilaevis	XP_008322665.1	GI:657791620	lacking YTH domain	tongue sole	bony fishes
Cyphomyrmex costatus	XP_018394854.1	GI:1070595410	lacking YTH domain		ants
Cyprinodon variegatus	XP_015257648.1	GI:974116382	Full YTHDC2	sheepshead minnow	bony fishes
Cyprinus carpio	KTF88379.1	GI:966653477	Full YTHDC2	common carp	bony fishes
Danio rerio	XP_017211699.1	GI:1040690518	Full YTHDC2	zebrafish	bony fishes
Danio rerio	XP_017210271.2	GI:1207170027	MEIOC	zebrafish	bony fishes
Daphnia magna	JAN78338.1	GI:942392817	lacking YTH domain		crustaceans
Dasypus novemcinctus	XP_004467326.1	GI:488551785	Full YTHDC2	nine-banded armadillo	placentals
Diachasma alloeum	XP_015112250.1	GI:970893702	lacking YTH domain		wasps &c.
Diaphorina citri	XP_008467887.1	GI:662190263	Full YTHDC2	Asian citrus psyllid	psyllids
Dipodomys ordii	XP_012871461.1	GI:852748105	Full YTHDC2	Ord's kangaroo rat	rodents
Drosophila ananassae	AIN40063.1	GI:683427100	Bam		flies
Drosophila arizonae	XP_017865054.1	GI:1060240825	Bgcn-like		flies
Drosophila arizonae	XP_017856620.1	GI:1060190598	Bam		flies
Drosophila atripex	AIN40097.1	GI:683427168	Bgcn-like		flies
Drosophila atripex	AIN40073.1	GI:683427120	Bam		flies
Drosophila biarmipes	XP_016953594.1	GI:1036804219	Bgcn-like		flies
Drosophila biarmipes	ABL86441.1	GI:119656358	Bam		flies
Drosophila bipectinata	XP_017106259.1	GI:1037092864	Bgcn-like		flies
Drosophila bipectinata	XP_017104203.1	GI:1037064118	Bam		flies
Drosophila busckii	XP_017839320.1	GI:1060219479	Bgcn-like		flies
Drosophila busckii	ALC46907.1	GI:924562249	Bam		flies
Drosophila elegans	XP_017120386.1	GI:1036954127	Bgcn-like		flies
Drosophila elegans	XP_017123754.1	GI:1037009452	Bam		flies
Drosophila erecta	ABK32544.1	GI:117188233	Bgcn-like		flies
Drosophila erecta	ABL86440.1	GI:119656356	Bam		flies
Drosophila eugracilis	XP_017070408.1	GI:1036875648	Bgcn-like		flies
Drosophila eugracilis	XP_017080002.1	GI:1037036595	Bam		flies
Drosophila ficusphila	XP_017052724.1	GI:1036977156	Bam		flies
Drosophila grimshawi	XP_001994705.1	GI:195055608	Bam		flies
Drosophila kikkawai	XP_017018562.1	GI:1036765888	Bgcn-like		flies
Drosophila kikkawai	XP_017020773.1	GI:1036804447	Bam		flies
Drosophila melanogaster	NP_523832.2	GI:22024028	Bgcn-like	fruit fly	flies
Drosophila melanogaster	CAA39662.1	GI:3928129	Bam	fruit fly	flies
Drosophila miranda	XP_017144843.1	GI:1037101037	Bam		flies
Drosophila mojavensis	XP_002005893.2	GI:968047360	Bgcn-like		flies
Drosophila mojavensis	XP_001998369.1	GI:195107545	Bam		flies
Drosophila persimilis	XP_002019844.1	GI:195157924	Bam		flies
Drosophila prostipennis	ABL86442.1	GI:119656360	Bam		flies
Drosophila pseudoobscura pseudoobscura	XP_001359990.2	GI:198455436	Bam		flies
Drosophila rhopaloa	XP_016974002.1	GI:1036784420	Bgcn-like		flies
Drosophila rhopaloa	XP_016980569.1	GI:1036896307	Bam		flies
Drosophila santomea	ABL86438.1	GI:119656352	Bam		flies
Drosophila sechellia	XP_002040155.1	GI:195347227	Bgcn-like		flies
Drosophila sechellia	XP_002043900.1	GI:195354832	Bam		flies
Drosophila serrata	XP_020811586.1	GI:1189089353	Bam		flies
Drosophila simulans	ABK32540.1	GI:117188225	Bgcn-like		flies
Drosophila simulans	XP_002104876.1	GI:195573793	Bam		flies
Drosophila takahashii	XP_017008057.1	GI:1036691315	Bam		flies
Drosophila teissieri	ABL86439.1	GI:119656354	Bam		flies
Drosophila virilis	XP_002049949.1	GI:195382463	Bgcn-like		flies
Drosophila virilis	XP_002053664.1	GI:195390015	Bam		flies
Drosophila willistoni	XP_002072880.1	GI:195451356	Bam		flies
Drosophila yakuba	XP_002092694.2	GI:969503735	Bgcn-like		flies
Drosophila yakuba	XP_002099081.1	GI:195504443	Bam		flies
Echinops telfairi	XP_004706688.1	GI:507662850	Full YTHDC2	small Madagascar hedgehog	placentals
Egretta garzetta	XP_009635129.1	GI:697829505	Full YTHDC2	little egret	birds
Elephantulus edwardii	XP_006886742.1	GI:585662055	Full YTHDC2	Cape elephant shrew	placentals
Eptesicus fuscus	XP_008142689.1	GI:641707428	Full YTHDC2	big brown bat	bats
Equus asinus	XP_014698306.1	GI:958666058	Full YTHDC2	ass	odd-toed ungulates
Equus caballus	XP_001918336.2	GI:338713357	Full YTHDC2	horse	odd-toed ungulates
Esox lucius	XP_010876258.1	GI:742131003	Full YTHDC2	northern pike	bony fishes
Falco cherrug	XP_005441681.2	GI:929467275	Full YTHDC2	Saker falcon	birds
Falco peregrinus	XP_005242574.2	GI:909807829	Full YTHDC2	peregrine falcon	birds
Ficedula albicollis	XP_005061976.1	GI:525029138	Full YTHDC2	collared flycatcher	birds
Fopius arisanus	XP_011312776.1	GI:755991157	lacking YTH domain		wasps &c.
Fukomys damarensis	XP_019061617.1	GI:1104959954	Full YTHDC2	Damara mole-rat	rodents
Fundulus heteroclitus	XP_012707270.1	GI:831491478	Full YTHDC2	mummichog	bony fishes
Gallus gallus	XP_004949327.1	GI:513231279	Full YTHDC2	chicken	birds
Gavia stellata	XP_009820394.1	GI:698388843	Full YTHDC2	red-throated loon	birds
Gavialis gangeticus	XP_019372819.1	GI:1117346371	Full YTHDC2	Gharial	vertebrates
Gekko japonicus	XP_015274134.1	GI:975117566	lacking YTH domain	Schlegel's Japanese gekko	lizards
Geospiza fortis	XP_005430171.2	GI:930243965	Full YTHDC2	medium ground-finch	birds
Gorilla gorilla gorilla	XP_018883929.1	GI:1099272614	Full YTHDC2	western lowland gorilla	primates
Graphocephala atropunctata	JAT09832.1	GI:1058212632	Full YTHDC2	blue-green sharpshooter	bugs
Halyomorpha halys	XP_014276460.1	GI:939629955	Full YTHDC2	brown marmorated stink bug	bugs
Haplochromis burtoni	XP_005943124.1	GI:554866193	Full YTHDC2	Burton's mouthbrooder	bony fishes
Helobdella robusta	XP_009013159.1	GI:675855198	lacking YTH domain	Californian leech	segmented worms
Heterocephalus glaber	XP_004836242.1	GI:512947529	Full YTHDC2	naked mole-rat	rodents
Hipposideros armiger	XP_019514682.1	GI:1121835712	Full YTHDC2	great roundleaf bat	bats
Homalodisca liturata	JAT04921.1	GI:1058202544	Full YTHDC2	smoketree sharpshooter	bugs
Homo sapiens	XP_011541883.1	GI:767936354	Full YTHDC2	human	primates
Homo sapiens	NP_001138552.2	GI:274315853	MEIOC	human	primates
Homo sapiens	NP_061903.2	GI:67782362	DHX29	human	primates
Homo sapiens	NP_945314.1	GI:39777586	DHX57	human	primates
Homo sapiens	NP_065916.2	GI:167830433	DHX36	human	primates
Homo sapiens	NP_001348.2	GI:100913206	DHX9	human	primates
Homo sapiens	NP_694591.2	GI:166851804	TDRD9	human	primates
Homo sapiens	NP_619520.1	GI:20336294	DHX30	human	primates
Homo sapiens	NP_001026902.1	GI:72534750	YTHDC1	human	primates
Homo sapiens	NP_060268.2	GI:31377750	YTHDF1	human	primates
Homo sapiens	NP_001166599.1	GI:290542345	YTHDF2	human	primates
Homo sapiens	NP_001264742.1	GI:481026555	YTHDF3	human	primates
Hydra vulgaris	XP_004211818.2	GI:828228635	Full YTHDC2		hydrozoans
Hydra vulgaris	XP_012554238.1	GI:828198412	MEIOC		hydrozoans
Ictalurus punctatus	XP_017315799.1	GI:1042346429	Full YTHDC2	channel catfish	bony fishes
Ixodes scapularis	XP_002409971.1	GI:241628392	Full YTHDC2	black-legged tick	mites & ticks
Jaculus jaculus	XP_004665037.1	GI:507562699	Full YTHDC2	lesser Egyptian jerboa	rodents
Kryptolebias marmoratus	XP_017282872.1	GI:1041118230	Full YTHDC2	mangrove rivulus	bony fishes
Larimichthys crocea	XP_019119606.1	GI:1108886363	lacking YTH domain	large yellow croaker	bony fishes
Lates calcarifer	XP_018523323.1	GI:1079796154	Full YTHDC2	barramundi perch	bony fishes
Latimeria chalumnae	XP_006000757.1	GI:556992931	Full YTHDC2	coelacanth	coelacanths
Lepidothrix coronata	XP_017668232.1	GI:1051171058	Full YTHDC2	blue-crowned manakin	birds
Lepisosteus oculatus	XP_015222321.1	GI:972954338	Full YTHDC2	spotted gar	bony fishes
Leptonychotes weddellii	XP_006735140.1	GI:585166068	Full YTHDC2	Weddell seal	carnivores
Limulus polyphemus	XP_013779316.1	GI:926627481	Full YTHDC2	Atlantic horseshoe crab	horseshoe crabs
Limulus polyphemus	XP_013782409.1	GI:926633226	MEIOC	Atlantic horseshoe crab	horseshoe crabs
Lipotes vexillifer	XP_007451267.1	GI:602731731	Full YTHDC2	Yangtze River dolphin	whales & dolphins
Loa loa	XP_020304921.1	GI:1158603334	Nematode type	eye worm	nematodes
Lottia gigantea	XP_009059681.1	GI:676473026	Full YTHDC2	owl limpet	gastropods
Loxodonta africana	XP_003405061.1	GI:344265985	Full YTHDC2	African savanna elephant	placentals
Lucilia cuprina	KNC22193.1	GI:906459127	Bgcn-like	Australian sheep blowfly	flies
Lucilia cuprina	KNC22385.1	GI:906459377	Full YTHDC2	Australian sheep blowfly	flies
Lucilia cuprina	KNC23519.1	GI:906460896	Bam	Australian sheep blowfly	flies
Macaca mulatta	XP_014996083.1	GI:966948178	Full YTHDC2	Rhesus monkey	primates
Macaca nemestrina	XP_011771181.1	GI:795489996	Full YTHDC2	pig-tailed macaque	primates
Manacus vitellinus	XP_017928439.1	GI:1062812402	Full YTHDC2	golden-collared manakin	birds
Mandrillus leucophaeus	XP_011821481.1	GI:795291457	Full YTHDC2	drill	primates
Marmota marmota marmota	XP_015343944.1	GI:984105249	Full YTHDC2	Alpine marmot	rodents
Maylandia zebra	XP_004564723.1	GI:499027985	Full YTHDC2	zebra mbuna	bony fishes
Melopsittacus undulatus	XP_005142130.1	GI:527247614	Full YTHDC2	budgerigar	birds
Merops nubicus	XP_008936551.1	GI:675615465	Full YTHDC2	carmine bee-eater	birds
Mesocricetus auratus	XP_005069209.1	GI:524930014	Full YTHDC2	golden hamster	rodents
Microcebus murinus	XP_012619192.1	GI:829761588	Full YTHDC2	gray mouse lemur	primates
Microplitis demolitor	XP_008552869.1	GI:665809038	lacking YTH domain		wasps &c.
Microtus ochrogaster	XP_005356120.1	GI:532026273	Full YTHDC2	prairie vole	rodents
Miniopterus natalensis	XP_016080414.1	GI:1016720896	Full YTHDC2	Natal long-fingered bat	bats
Monodelphis domestica	XP_001370066.1	GI:126320676	Full YTHDC2	gray short-tailed opossum	marsupials
Mus musculus	NP_001156485.1	GI:244793002	Full YTHDC2	house mouse	rodents
Mus musculus	NP_001121048.1	GI:189011710	MEIOC	house mouse	rodents
Mus musculus	NP_766182.2	GI:46852276	DHX29	house mouse	rodents
Mus musculus	NP_001157231.1	GI:254939654	DHX57	house mouse	rodents
Mus musculus	NP_082412.2	GI:240848573	DHX36	house mouse	rodents
Mus musculus	NP_031868.2	GI:150456419	DHX9	house mouse	rodents
Mus musculus	NP_083332.1	GI:198278551	TDRD9	house mouse	rodents
Mus musculus	NP_001239611.1	GI:358248315	DHX30	house mouse	rodents
Musca domestica	XP_005190912.1	GI:557782600	Bgcn-like	house fly	flies
Musca domestica	XP_005191426.1	GI:557783637	Full YTHDC2	house fly	flies
Musca domestica	XP_019893994.1	GI:1135087606	Bam	house fly	flies
Mustela putorius furo	XP_004759111.1	GI:511878312	Full YTHDC2	domestic ferret	carnivores
Myotis brandtii	XP_005866530.1	GI:554543857	Full YTHDC2	Brandt's bat	bats
Myotis davidii	XP_006755342.1	GI:584070016	Full YTHDC2	David's myotis	bats
Myotis lucifugus	XP_006081206.1	GI:558096969	Full YTHDC2	little brown bat	bats
Nannospalax galili	XP_008823476.1	GI:674104580	Full YTHDC2	Upper Galilee mountains blind mole rat	rodents
Nanorana parkeri	XP_018417993.1	GI:1072265004	Full YTHDC2	Tibetan Plateau frog	frogs & toads
Nematostella vectensis	XP_001632393.1	GI:156382101	Full YTHDC2	starlet sea anemone	sea anemones
Neodiprion lecontei	XP_015520709.1	GI:998519539	lacking YTH domain	redheaded pine sawfly	hymenopterans
Neolamprologus brichardi	XP_006797371.1	GI:584004741	Full YTHDC2	lyretail cichlid	bony fishes
Nipponia nippon	XP_009467462.1	GI:694852223	Full YTHDC2	crested ibis	birds
Nomascus leucogenys	XP_003259888.1	GI:332221479	Full YTHDC2	northern white-cheeked gibbon	primates
Nothobranchius furzeri	XP_015829646.1	GI:1007711339	Full YTHDC2	turquoise killifish	bony fishes
Ochotona princeps	XP_012782783.1	GI:837807639	Full YTHDC2	American pika	rabbits & hares
Octodon degus	XP_004632284.1	GI:507649089	Full YTHDC2	degu	rodents
Octopus bimaculoides	XP_014778535.1	GI:961109949	Full YTHDC2	California two-spot octopus	cephalopods
Odobenus rosmarus divergens	XP_004414391.1	GI:472390152	Full YTHDC2	Pacific walrus	carnivores
Oncorhynchus mykiss	CDQ69008.1	GI:642114147	Full YTHDC2	rainbow trout	bony fishes
Ophiophagus hannah	ETE67645.1	GI:565315854	Full YTHDC2	king cobra	snakes
Opisthocomus hoazin	XP_009931843.1	GI:700383768	Full YTHDC2	hoatzin	birds
Orcinus orca	XP_004267508.1	GI:465995747	Full YTHDC2	killer whale	whales & dolphins
Oreochromis niloticus	XP_005449571.1	GI:542219235	Full YTHDC2	Nile tilapia	bony fishes
Ornithorhynchus anatinus	XP_016083041.1	GI:1018978878	lacking YTH domain	platypus	monotremes
Orussus abietinus	XP_012273815.1	GI:817196457	lacking YTH domain		hymenopterans
Orycteropus afer afer	XP_007945762.1	GI:634866953	Full YTHDC2	aardvark	placentals
Oryctes borbonicus	KRT80786.1	GI:952520384	Full YTHDC2	rhinoceros beetle	beetles
Oryctolagus cuniculus	XP_008246608.1	GI:655885348	Full YTHDC2	rabbit	rabbits & hares
Otolemur garnettii	XP_003788959.1	GI:395831759	Full YTHDC2	small-eared galago	primates
Ovis aries	XP_014952261.1	GI:965944363	Full YTHDC2	sheep	even-toed ungulates
Ovis aries musimon	XP_012020293.1	GI:803324213	Full YTHDC2	mouflon	even-toed ungulates
Pan paniscus	XP_003826777.1	GI:397512911	Full YTHDC2	pygmy chimpanzee	primates
Pan troglodytes	XP_016809128.1	GI:1034169933	Full YTHDC2	chimpanzee	primates
Panthera pardus	XP_019325169.1	GI:1111182379	Full YTHDC2	leopard	carnivores
Panthera tigris altaica	XP_007083173.1	GI:591313452	Full YTHDC2	Amur tiger	carnivores
Papilio machaon	XP_014363277.1	GI:943961635	Full YTHDC2	common yellow swallowtail	butterflies
Papilio xuthus	KPJ04491.1	GI:930662767	Full YTHDC2	Asian swallowtail	butterflies
Papio anubis	XP_009207166.1	GI:685546962	Full YTHDC2	olive baboon	primates
Parasteatoda tepidariorum	XP_015929707.1	GI:1009603234	Full YTHDC2	common house spider	spiders
Parus major	XP_015470987.1	GI:998742980	Full YTHDC2	Great Tit	birds
Pediculus humanus corporis	XP_002428983.1	GI:242017002	Full YTHDC2	human body louse	lice
Pelodiscus sinensis	XP_006134531.1	GI:558214980	Full YTHDC2	Chinese soft-shelled turtle	turtles
Peromyscus maniculatus bairdii	XP_006977729.1	GI:589929834	Full YTHDC2	prairie deer mouse	rodents
Phalacrocorax carbo	XP_009506052.1	GI:695156196	Full YTHDC2	great cormorant	birds
Physeter catodon	XP_007122652.1	GI:593768376	Full YTHDC2	sperm whale	whales & dolphins
Picoides pubescens	XP_009907284.1	GI:699631452	Full YTHDC2	downy woodpecker	birds
Plutella xylostella	XP_011549004.1	GI:768416799	Full YTHDC2	diamondback moth	moths
Poecilia formosa	XP_007574124.1	GI:617467208	Full YTHDC2	Amazon molly	bony fishes
Poecilia latipinna	XP_014870965.1	GI:961976948	Full YTHDC2	sailfin molly	bony fishes
Poecilia mexicana	XP_014862714.1	GI:961926380	Full YTHDC2	shortfin molly	bony fishes
Poecilia reticulata	XP_008421311.1	GI:658876596	Full YTHDC2	guppy	bony fishes
Pristionchus pacificus	KKA79129.1	GI:802795818	MEIOC		nematodes
Propithecus coquereli	XP_012514963.1	GI:826336715	Full YTHDC2	Coquerel's sifaka	primates
Protobothrops mucrosquamatus	XP_015682605.1	GI:1002606666	Full YTHDC2	Taiwan habu	snakes
Pseudopodoces humilis	XP_005530058.1	GI:543373684	Full YTHDC2	Tibetan ground-tit	birds
Pteropus alecto	XP_006913349.1	GI:586560151	Full YTHDC2	black flying fox	bats
Pteropus vampyrus	XP_011363488.1	GI:759134660	Full YTHDC2	large flying fox	bats
Pundamilia nyererei	XP_013770910.1	GI:923869564	Full YTHDC2		bony fishes
Pygocentrus nattereri	XP_017572167.1	GI:1049264394	Full YTHDC2	red-bellied piranha	bony fishes
Pygoscelis adeliae	XP_009319367.1	GI:690436042	Full YTHDC2	Adelie penguin	birds
Python bivittatus	XP_007430448.1	GI:602648057	Full YTHDC2	Burmese python	snakes
Rattus norvegicus	XP_003754609.1	GI:392342510	Full YTHDC2	Norway rat	rodents
Rhagoletis zephyria	XP_017468276.1	GI:1048014612	Bgcn-like	snowberry fruit fly	flies
Rhagoletis zephyria	XP_017477219.1	GI:1048040665	Full YTHDC2	snowberry fruit fly	flies
Rhagoletis zephyria	XP_017479425.1	GI:1048048758	Bam	snowberry fruit fly	flies
Rhinolophus sinicus	XP_019583358.1	GI:1123938912	Full YTHDC2	Chinese rufous horseshoe bat	bats
Rhinopithecus bieti	XP_017703933.1	GI:1059094123	Full YTHDC2	black snub-nosed monkey	primates
Rhinopithecus roxellana	XP_010374131.1	GI:724887029	Full YTHDC2	golden snub-nosed monkey	primates
Rousettus aegyptiacus	XP_016002801.1	GI:1012014674	Full YTHDC2	Egyptian rousette	bats
Saimiri boliviensis boliviensis	XP_003920739.1	GI:403256107	Full YTHDC2	Bolivian squirrel monkey	primates
Salmo salar	XP_013984132.1	GI:929184884	Full YTHDC2	Atlantic salmon	bony fishes
Sarcophilus harrisii	XP_003759555.1	GI:395510586	Full YTHDC2	Tasmanian devil	marsupials
Schizosaccharomyces pombe	O74958.3	GI:259016338	Mmi1	fission yeast	fungi
Scleropages formosus	XP_018589912.1	GI:1083282843	Full YTHDC2	Asian bonytongue	bony fishes
Serinus canaria	XP_018776731.1	GI:1096014774	Full YTHDC2	common canary	birds
Sinocyclocheilus anshuiensis	XP_016339972.1	GI:1025080824	Full YTHDC2		bony fishes
Sinocyclocheilus rhinocerous	XP_016379540.1	GI:1025294664	Full YTHDC2	horned Golden-line barbel	bony fishes
Sorex araneus	XP_004612786.1	GI:505838505	Full YTHDC2	European shrew	insectivores
Stegastes partitus	XP_008287031.1	GI:657567304	Full YTHDC2	bicolor damselfish	bony fishes
Stomoxys calcitrans	XP_013100345.1	GI:907639775	Bgcn-like	stable fly	flies
Stomoxys calcitrans	XP_013109593.1	GI:907699948	Full YTHDC2	stable fly	flies
Stomoxys calcitrans	XP_013110749.1	GI:907595789	Bam	stable fly	flies
Strongylocentrotus purpuratus	XP_011672995.1	GI:780082650	lacking YTH domain	purple sea urchin	sea urchins
Strongylocentrotus purpuratus	XP_003723425.2	GI:780149492	MEIOC	purple sea urchin	sea urchins
Struthio camelus australis	XP_009683824.1	GI:697513649	Full YTHDC2	southern ostrich	birds
Sturnus vulgaris	XP_014729877.1	GI:959054086	Full YTHDC2	common starling	birds
Taeniopygia guttata	XP_012433153.1	GI:823474467	Full YTHDC2	zebra finch	birds
Taeniopygia guttata	XP_002192301.2	GI:449490919	MEIOC	zebra finch	birds
Takifugu rubripes	XP_011602705.1	GI:768918949	Full YTHDC2	torafugu	bony fishes
Tetraodon nigroviridis	CAF91170.1	GI:47210322	Full YTHDC2	spotted green pufferfish	bony fishes
Thamnophis sirtalis	XP_013911441.1	GI:927135689	Full YTHDC2	common garter snake	snakes
Tinamus guttatus	XP_010216923.1	GI:719732792	Full YTHDC2	white-throated tinamou	birds
Toxocara canis	KHN87531.1	GI:734561430	Nematode type	dog roundworm	nematodes
Tribolium castaneum	XP_008198757.1	GI:642937251	Full YTHDC2	red flour beetle	beetles
Trichechus manatus latirostris	XP_004377042.1	GI:471378480	Full YTHDC2	Florida manatee	placentals
Trichogramma pretiosum	XP_014231948.1	GI:936676571	lacking YTH domain		wasps &c.
Tupaia chinensis	XP_006146958.2	GI:947222749	Full YTHDC2	Chinese tree shrew	placentals
Ursus maritimus	XP_008707709.1	GI:671033775	Full YTHDC2	polar bear	carnivores
Vaccinia virus	AAO89356.1	GI:29692183	NPH-II		virus
Xenopus laevis	XP_018119820.1	GI:1069314262	Full YTHDC2	African clawed frog	frogs & toads
Xenopus tropicalis	XP_004910524.1	GI:512810711	Full YTHDC2	tropical clawed frog	frogs & toads
Xenopus tropicalis	XP_002941590.2	GI:512874767	MEIOC	tropical clawed frog	frogs & toads
Xiphophorus maculatus	XP_014328376.1	GI:941805020	Full YTHDC2	southern platyfish	bony fishes
Zonotrichia albicollis	XP_014127872.1	GI:929514478	Full YTHDC2	white-throated sparrow	birds
Zootermopsis nevadensis	KDR10374.1	GI:646700027	Full YTHDC2	Nevada dampwood termite	termites
