# Supplementary material for: ketu mutant mice uncover an essential meiotic function for the ancient RNA helicase YTHDC2
Source: eLife. 2018 Jan 23;7:e30919. doi: 10.7554/eLife.30919 (PMC5832417; doi:10.7554/eLife.30919)
Supplement: Supplementary file 4. [file elife-30919-supp4.xlsx]

## Sheet: Sheet1
Supplementary File 4. Genotyping primers and oligos used to make helicase assay substrates.
Primer name	Sequence	Notes
ketu F	TCGCCAAAGACACTTCTGACATT	genotyping primer
ketu R	TTCAGCAATAGTCTTACCCCAAT	genotyping primer
Ythdc2 F1	TACCTATAATTGTCTGTCTATAAGTGGAAC	genotyping primer
Ythdc2 F2	CACACACACATACACACAGTGC	genotyping primer
Ythdc2 F3	CTGATCTGTGGACACATATGGTGC	genotyping primer
Ythdc2 R1	GACTTAAATGTAGGCAGACACCTG	genotyping primer
Ythdc2 R2	GAGCCTGAGAGATGATGGCTC	genotyping primer
Ythdc2 R3	GACTTAAATGTAGGCAGACACCTGTATACG	genotyping primer
Ythdc2 Seq1	GCATCTGGTGTCTAAGCCAAAC	genotyping primer
RP170a	6-FAM-AGCACCGUAAAGACGC	6-FAM labeled RNA to make an RNA duplex
RP179	GCGUCUUUACGGUGCUAAAAAAAAAAAAAAAAAAAAAAAAA	RNA for duplex with 3’ poly(A) overhang
RP174	AAAAAAAAAAAAAAAAAAAAAAAAGCGUCUUUACGGUGCU	RNA for duplex with 5’ poly(A) overhang
RP111	GCGUCUUUACGGUGCUUUUUUUUUUUUUUUUUUUUUUUUUU	RNA for duplex with 3’ poly(U) overhang
RP173	UUUUUUUUUUUUUUUUUUUUUUUUGCGUCUUUACGGUGCU	RNA for duplex with 5’ poly(U) overhang
RP172	GCGUCUUUACGGUGCU	RNA for duplex with blunt ends
RP171	GCGTCTTTACGGTGCT	DNA capture strand
