# Supplementary figures and images for: ketu mutant mice uncover an essential meiotic function for the ancient RNA helicase YTHDC2
Source: eLife journal article supplement (doi:10.7554/elife.30919), 2018-01-23

Figure 8–Figure Supplement 1

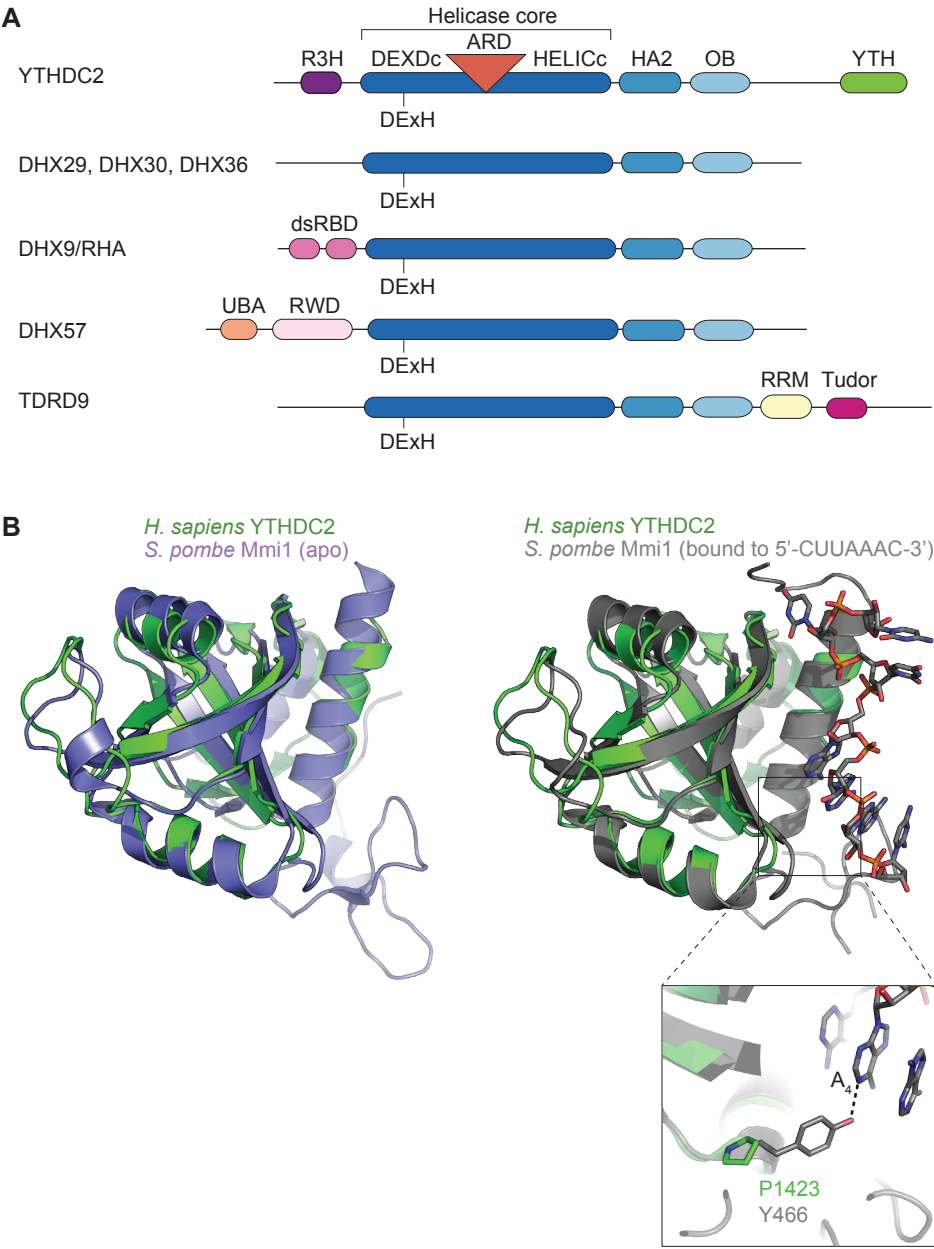

Supplement: supp [file elife-30919-supp-v1.zip]

Figure 3–Figure Supplement 1

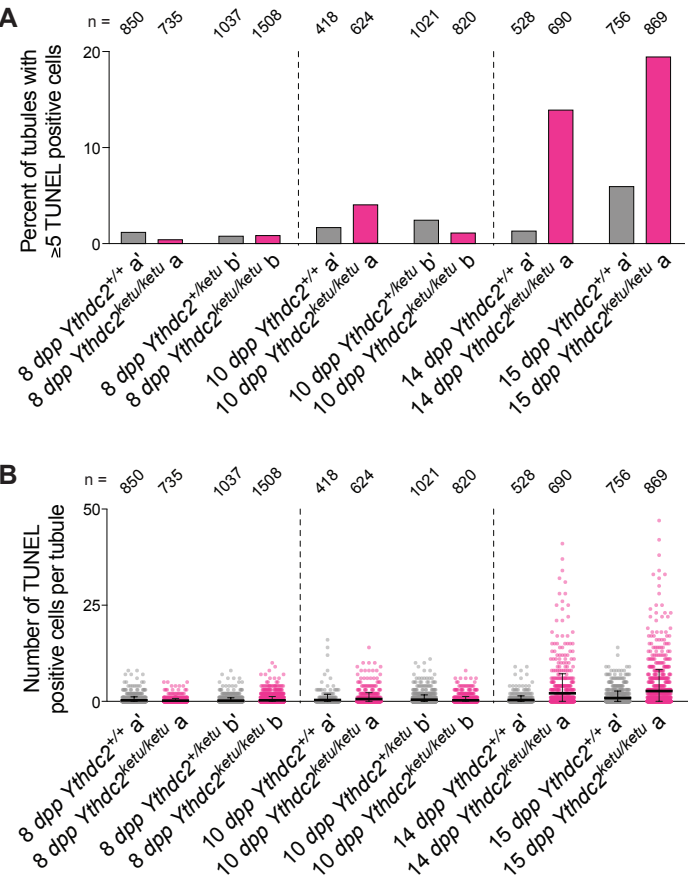

Supplement: supp [file elife-30919-supp-v1.zip]

**A**

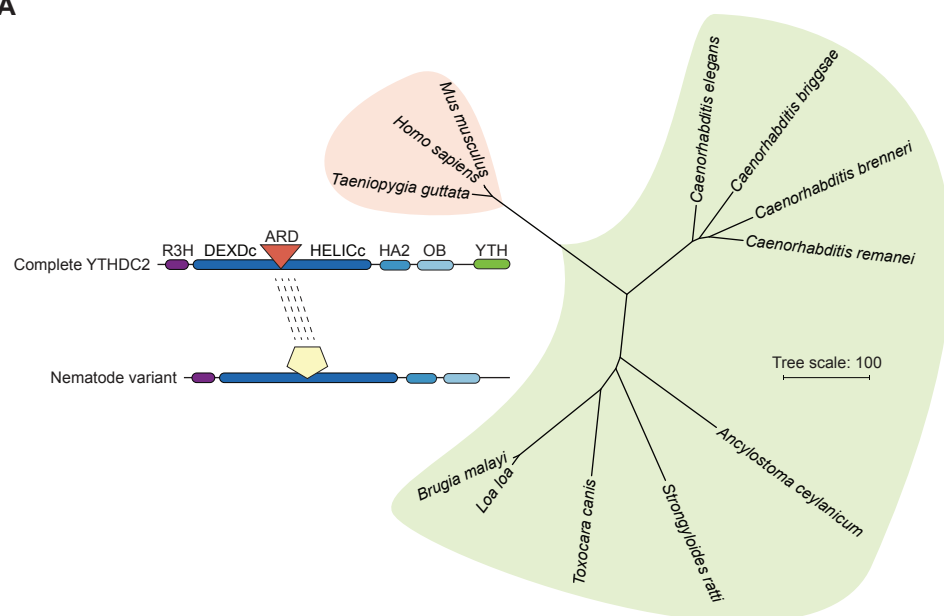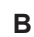[illegible]

Supplement: supp [file elife-30919-supp-v1.zip]

**Figure 4–Figure Supplement 1**

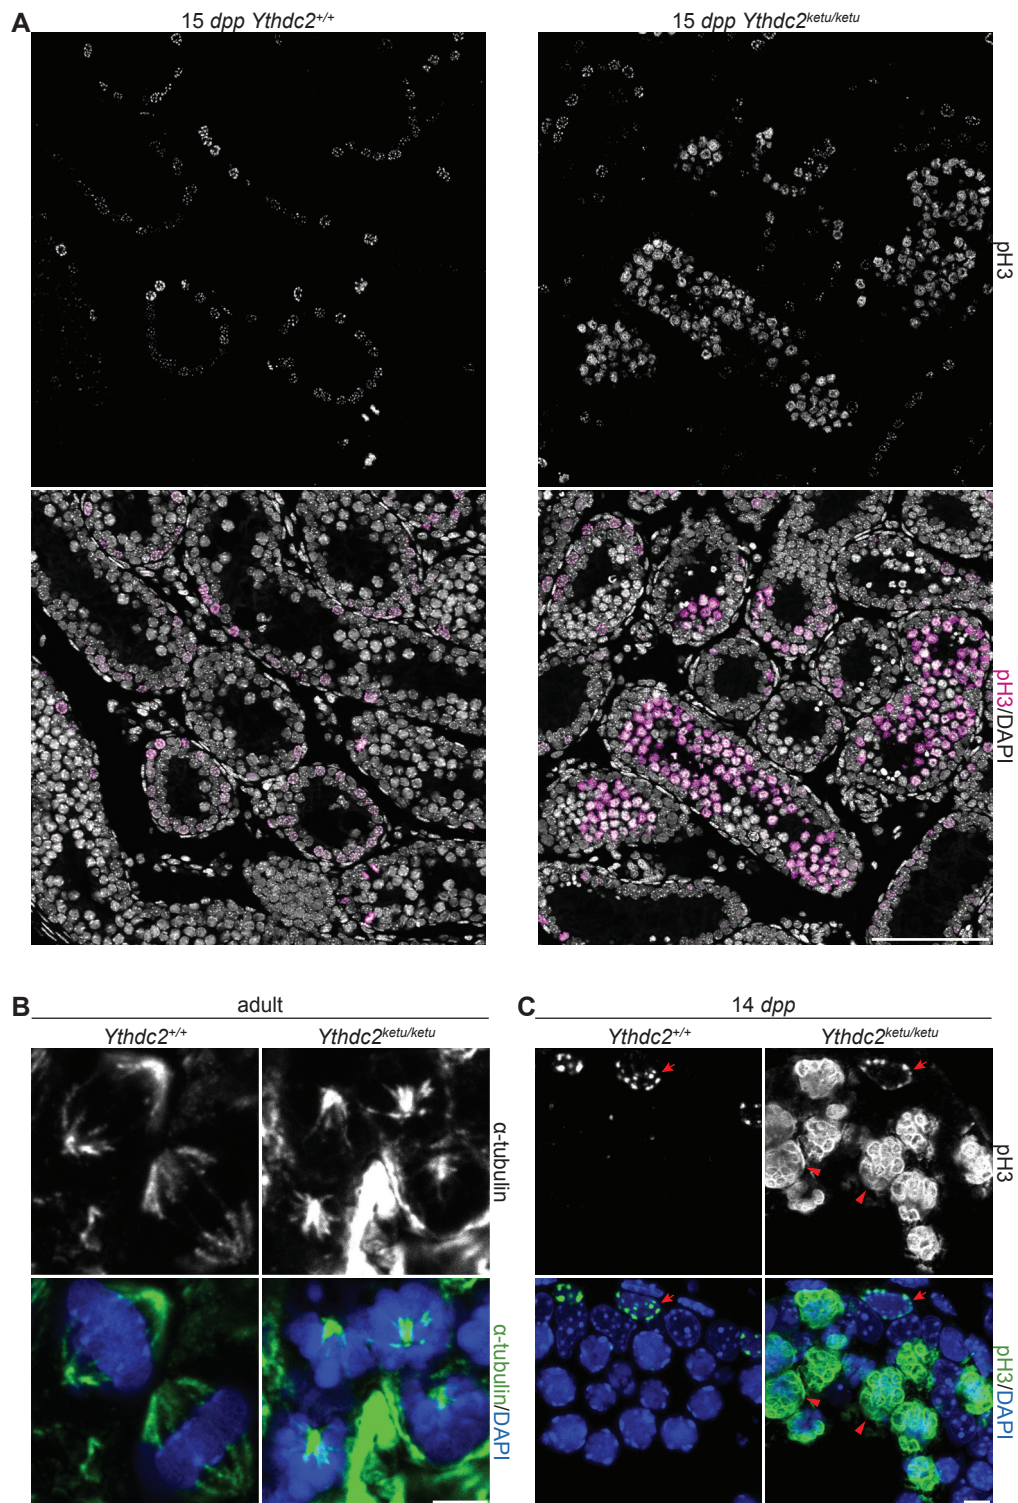

Supplement: supp [file elife-30919-supp-v1.zip]

Figure 5–Figure Supplement 1

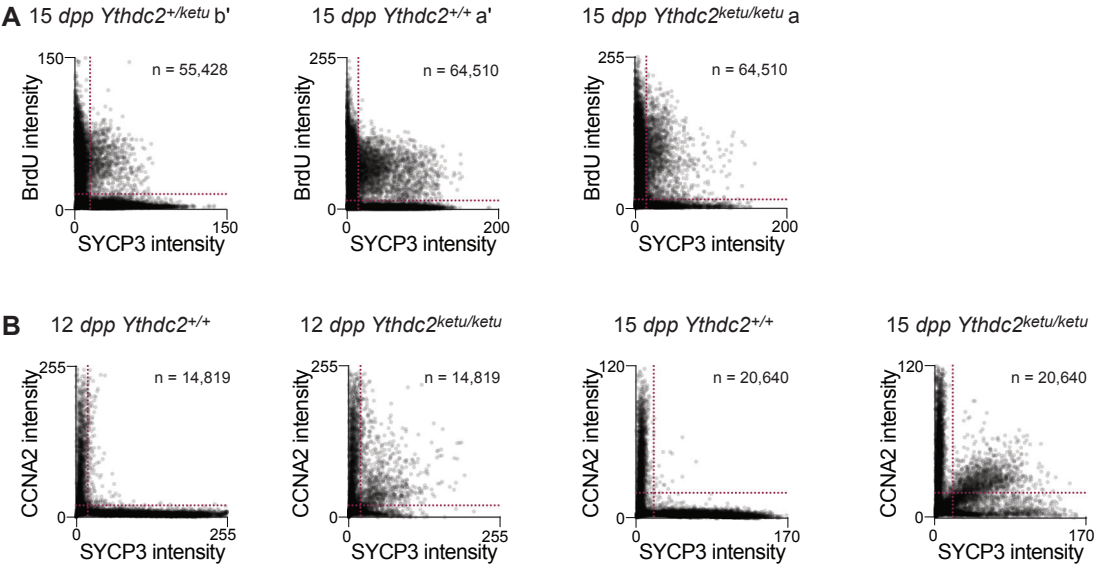

Supplement: supp [file elife-30919-supp-v1.zip]

Figure 6–Figure Supplement 1

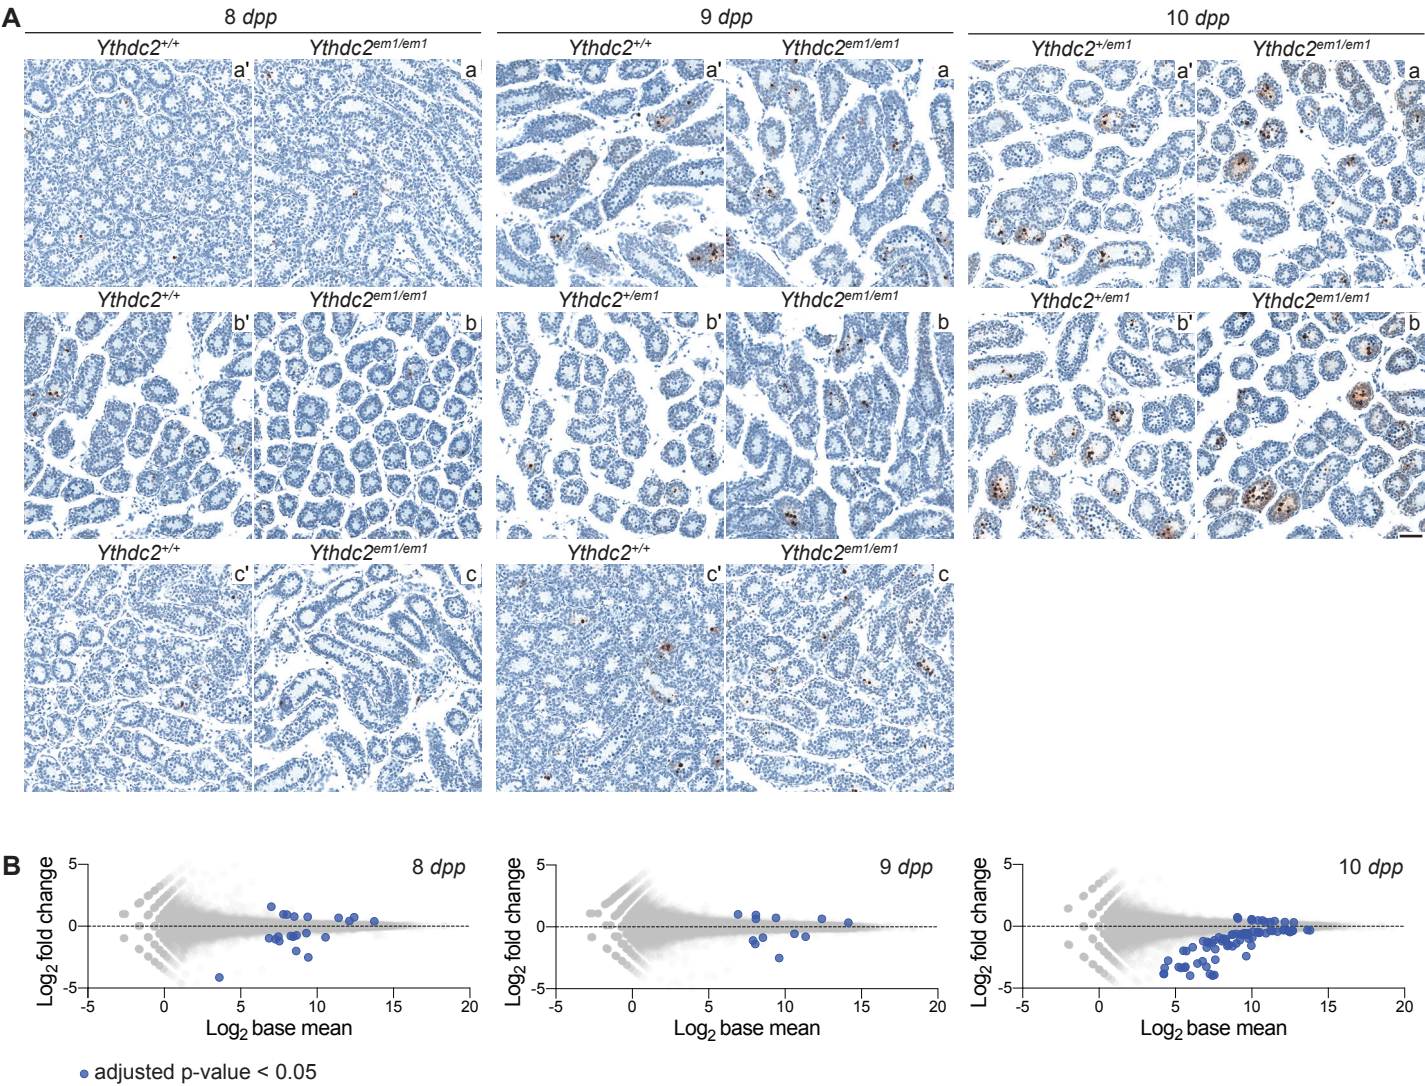

Supplement: supp [file elife-30919-supp-v1.zip]

**Figure 9–Figure Supplement 1**

**A**

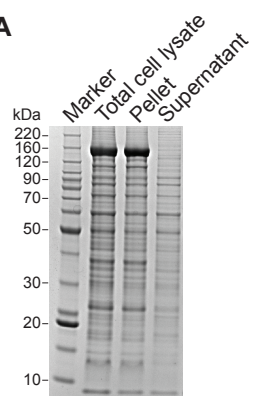

**B**

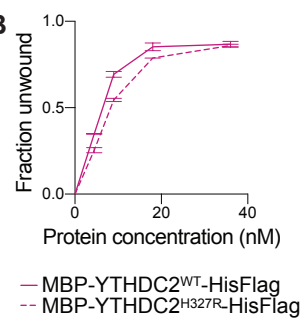

Supplement: supp [file elife-30919-supp-v1.zip]

Figure 7–Figure Supplement 1

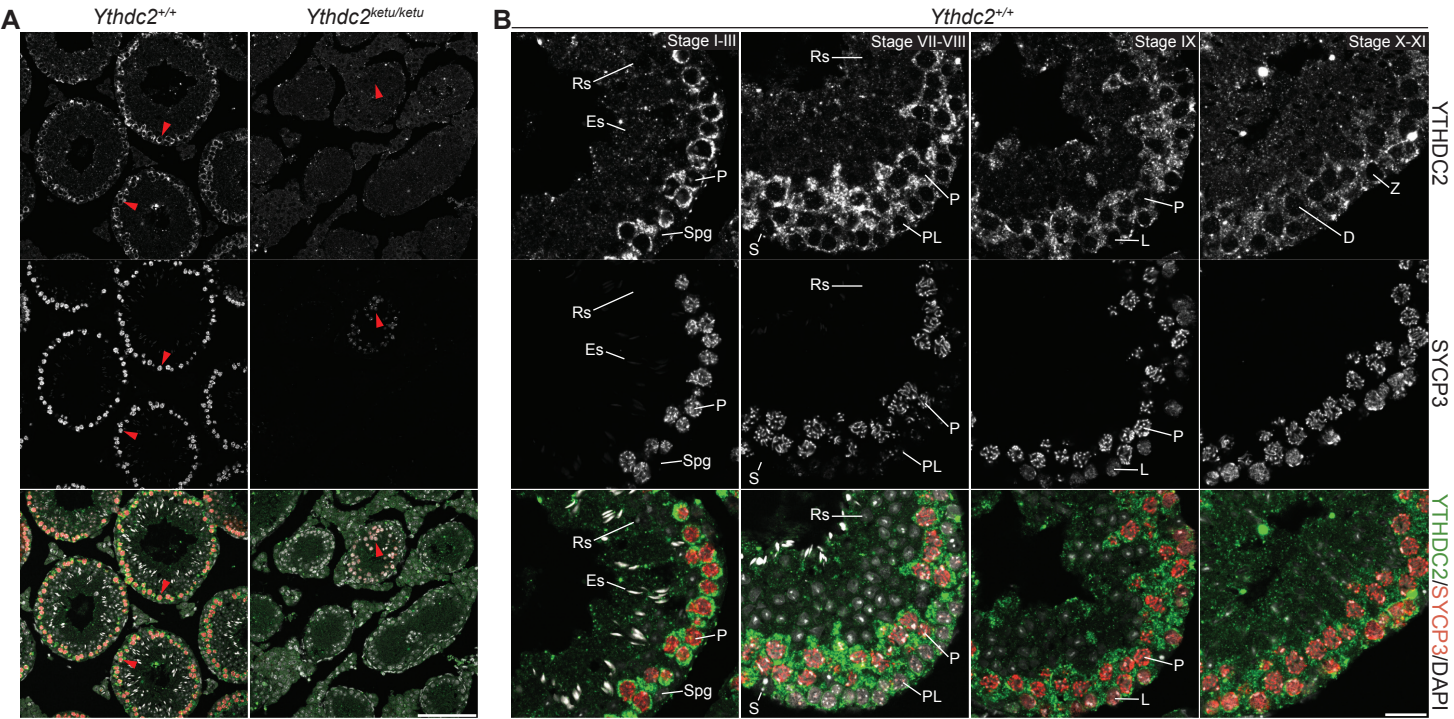

Supplement: supp [file elife-30919-supp-v1.zip]
